# Supplementary material for: Infection and mortality of healthcare workers worldwide from COVID-19: a systematic review
Source: PubMed Central journal article supplement — BMJ Glob Health. 2020 Dec 4;5(12):e003097. doi: 10.1136/bmjgh-2020-003097 (PMC7722361; doi:10.1136/bmjgh-2020-003097), 2020-12-04
Supplement: bmjgh-2020-003097supp003.pdf [file bmjgh-2020-003097supp003.pdf]

**Appendix S3: Search Strategy executed in MEDLINE and EMBASE**

1. health care practitioner.ti,ab
2. health care professional.ti,ab
3. health care provider.ti,ab
4. health care worker.ti,ab
5. health personnel.ti,ab
6. health profession personnel.ti,ab
7. health worker.ti,ab
8. healthcare personnel.ti,ab
9. healthcare practitioner.ti,ab
10. healthcare professional.ti,ab
11. healthcare provider.ti,ab
12. healthcare worker.ti,ab
13. health care manpower.ti,ab
14. health care work force.ti,ab
15. health care workforce.ti,ab
16. health labor force.ti,ab
17. health labour force.ti,ab
18. health manpower.ti,ab
19. health work force.ti,ab
20. healthcare labor force.ti,ab
21. healthcare labour force.ti,ab
22. healthcare manpower.ti,ab
23. healthcare work force.ti,ab
24. healthcare workforce.ti,ab
25. medical manpower.ti,ab
26. doctor.ti,ab
27. medical practitioner.ti,ab
28. physician associate.ti,ab
29. physicians.ti,ab
30. practitioner.ti,ab
31. private physician.ti,ab
32. nurse.ti,ab
33. nurses aides.ti,ab
34. nursing aid.ti,ab
35. nursing aide.ti,ab

36. nursing assistants.ti,ab
37. orderlies.ti,ab
38. porters.ti,ab
39. healthcare assistants.ti,ab
40. physician assistant.ti,ab
41. advanced clinical practitioner.ti,ab
42. advanced practice clinician.ti,ab
43. advanced practice professional.ti,ab
44. allied health provider.ti,ab
45. clinical associate.ti,ab
46. limited-license practitioner.ti,ab
47. mid-level practitioner.ti,ab
48. mid-level provider.ti,ab
49. non-physician practitioner.ti,ab
50. non-physician provider.ti,ab
51. physician extender.ti,ab
52. care coordinator.ti,ab
53. health care coordinator.ti,ab
54. healthcare coordinator.ti,ab
55. medical dispatcher.ti,ab
56. accredited social health activist.ti,ab
57. ASHA (accredited social health activist).ti,ab
58. ASHA workers.ti,ab
59. auxiliary health worker.ti,ab
60. barefoot doctor.ti,ab
61. health practitioner.ti,ab
62. health aides.ti,ab
63. health officers.ti,ab
64. medical auxiliary.ti,ab
65. hospital personnel.ti,ab
66. hospital employee.ti,ab
67. hospital staff.ti,ab
68. hospital staffing.ti,ab
69. hospital worker.ti,ab
70. personnel, hospital.ti,ab
71. hospital administrator.ti,ab

72. hospital volunteer.ti,ab
73. medical staff.ti,ab
74. hospital auxiliary worker.ti,ab
75. hospitalists.ti,ab
76. coroner.ti,ab
77. medical assistant.ti,ab
78. medical chaperone.ti,ab
79. medical expert.ti,ab
80. medical staff.ti,ab
81. physician assistant.ti,ab
82. psychotherapist.ti,ab
83. physiotherapist.ti,ab
84. occupational therapist.ti,ab
85. pharmacist.ti,ab
86. allied health personnel.ti,ab
87. paramedical personnel.ti,ab
88. para medical personnel.ti,ab
89. paramedical assistant.ti,ab
90. paramedical manpower.ti,ab
91. paramedical professional.ti,ab
92. paramedical staff.ti,ab
93. psychiatric aides.ti,ab
94. medical student.ti,ab
95. student nurse.ti,ab
96. corona.ti,ab
97. coronavirus.ti,ab
98. COVID.ti,ab
99. COVID-19.ti,ab
- 100.SARS-CoV-2.ti,ab
- 101.Pandemic.ti,ab
102. 1 or 2 or 3 or 4 or 5 or 6 or 7 or 8 or 9 or 10 or 11 or 12 or 13 or 14 or 15 or 16 or 17 or 18 or 19 or 20 or 21 or 22 or 23 or 24 or 25 or 26 or 27 or 28 or 29 or 30 or 31 or 32 or 33 or 34 or 35 or 36 or 37 or 38 or 39 or 40 or 41 or 42 or 43 or 44 or 45 or 46 or 47 or 48 or 49 or 50 or 51 or 52 or 53 or 54 or 55 or 56 or 57 or 58 or 59 or 60 or 61 or 62 or 63 or 64 or 65 or 66 or 67 or 68 or 69 or 70 or 71 or 72 or 73 or 74 or 75 or 76 or 77 or 78 or 79 or 80 or 81 or 82 or 83 or 84 or 85 or 86 or 87 or 88 or 89 or 90 or 91 or 92 or 93 or 94 or 95
- 103.96 or 97 or 98 or 99 or 100 or 101
104. 102 and 103
105. Limit 104 to yr = "2019 – Current"

106.Limit 105 to humans
