# Supplementary material for: Infection and mortality of healthcare workers worldwide from COVID-19: a systematic review
Source: PubMed Central journal article supplement — BMJ Glob Health. 2020 Dec 4;5(12):e003097. doi: 10.1136/bmjgh-2020-003097 (PMC7722361; doi:10.1136/bmjgh-2020-003097), 2020-12-04
Supplement: bmjgh-2020-003097supp004.pdf [file bmjgh-2020-003097supp004.pdf]

What search terms did you use  
to find this document?

Title of document

Location of document

Name of first author

Country of first author

Date of publication

Country being studied (if multiple countries, create separate rows if individual analysis available)

Type of publication (study, synopses of studies, synthesis, synopses of synthesis, summaries)

Number of studies (if synthesis, synopses of synthesis, summaries)

Type of study(ies)

Date for which these figures  
are true

Total number of healthcare  
workers in the country

|                             |                                                         |                                                                                  |
|-----------------------------|---------------------------------------------------------|----------------------------------------------------------------------------------|
| Total population of country | Total number of confirmed COVID-19 cases in the country | Total number of confirmed COVID-19 cases among healthcare workers in the country |
|-----------------------------|---------------------------------------------------------|----------------------------------------------------------------------------------|

Total number of intensive care unit (ICU) admissions due to COVID-19 in the country

Total number of healthcare workers admitted to intensive care unit (ICU) due to COVID-19 in the country

Total number of deaths due

Total number of deaths in intensive care units (ICU)

to COVID-19 in the country      Total number of healthcare workers deaths due to COVID-19 in the country

Total number of deaths overall      Total number of deaths in intensive care units (ICU)      Total number of deaths overall

## Age

List the ages of all healthcare workers with confirmed cases of COVID-19 in the country

List the ages of healthcare workers who died due to COVID -19 in the country

Number of male healthcare workers with confirmed cases of COVID-19 in the country



## Sex

Number of female healthcare workers with confirmed cases of COVID-19 in the country

Number of male healthcare workers deaths due to COVID-19 in the country

Number of female healthcare workers deaths due to COVID-19 in the country

Ethnicity/race of healthcare workers with confirmed cases of COVID-19 in the country (free text)

Ethnicity/race of healthcare workers who died due to COVID-19 in the country (free text)

Number of student healthcare workers with confirmed cases of COVID-19 in the country

Sta

Number of trainee healthcare workers with confirmed cases of COVID-19 in the country

Number of fully-qualified healthcare workers with confirmed cases of COVID-19 in the country

Number of retired healthcare workers with confirmed cases of COVID-19 in the country

## Demographics

age

Number of student healthcare workers who died due to COVID-19 in the country

Number of trainee healthcare workers who died due to COVID-19

Number of fully-qualified healthcare workers who died due to COVID-19 in the country

Number of retired healthcare workers who died due to COVID-19 in the country

Number of doctors with confirmed cases of COVID-19 in the country

Number of nurses with confirmed cases of COVID-19 in the country

Number of midwives with confirmed cases of COVID-19 in the country

Number of allied-healthcare professionals with confirmed cases of COVID-19 in the country

Number of support staff with confirmed cases of COVID-19 in the country

Role of health workers ([https://www.who.int/whr/2006/06\\_chap1\\_en.pdf](https://www.who.int/whr/2006/06_chap1_en.pdf))

Number of administrators with confirmed cases of COVID-19 in the country

Number of doctors who died due to COVID-19 in the country

Number of nurses who died due to COVID-19 in the country

| Number of midwives who died due to COVID-19 in the country | Number of allied-healthcare professionals who died due to COVID-19 in the country | Number of support staff who died due to COVID-19 in the country |
|------------------------------------------------------------|-----------------------------------------------------------------------------------|-----------------------------------------------------------------|
|------------------------------------------------------------|-----------------------------------------------------------------------------------|-----------------------------------------------------------------|



Mean length of time from presenting with COVID-19 symptoms to being tested for the general population

Number of administrators who died due to COVID-19 in the country

Other information (i.e. speciality of those who died, the exact role of the support staff etc.)

Mean length of time from presenting with COVID-19 symptoms to being tested for healthcare workers

Mean length of time from presenting with COVID-19 symptoms to being diagnosed with COVID-19 for the general population

Mean length of time from presenting with COVID-19 symptoms to being diagnosed with COVID-19 for healthcare workers

Mean length of time from presenting with COVID-19 symptoms to death due to COVID-19 for the general population

Mean length of time from presenting with COVID-19 symptoms to death due to COVID-19 for healthcare workers

Number of hospital beds available in the country

## Infrastructure

Number of hospital beds  
needed for COVID-19 patients

Number of ITU beds available  
in the country

Number of ITU beds needed  
for COVID-19 patients

Number of ventilators  
available in the country

Number of ventilators needed  
for COVID-19 patients in the  
country

Number of tests for COVID-19  
performed for the general  
population

Popula:

Date at which testing for  
COVID-19 began in the general  
population

Country-level self-isolation  
advice provided [yes/no]

Contact tracing of population  
implemented [yes/no]

tion level methods of control [if **NO**, write 0; if **YES** write the date at which this policy was implem

Mandated social distancing  
[yes/no]

Travel restrictions  
implemented [yes/no]

Stay at home order issued  
[yes/no]

ented]

Non-essential events cancelled  
[yes/no]

Non-essential services closed  
[yes/no]

Education facilities closed  
[yes/no]



Healthcare workforce methods of control [if NO, write 0; if

| Borders closed [yes/no] | Date at which testing for COVID-19 began for healthcare workers | Contact tracing of healthcare workers implemented [yes/no] |
|-------------------------|-----------------------------------------------------------------|------------------------------------------------------------|
|-------------------------|-----------------------------------------------------------------|------------------------------------------------------------|

[ YES write the date at which this policy was implemented]

AACODS Checklist: Authority  
[yes/no/maybe]

Healthcare workers prioritised for COVID-19 testing [yes/no]      Elective cases re-scheduled/cancelled [yes/no]

AACODS Checklist: Accuracy  
[yes/no/maybe]

AACODS Checklist: Coverage  
[yes/no/maybe]

AACODS Checklist: Objectivity  
[yes/no/maybe]

AACODS Checklist: Date  
[yes/no/maybe]

AACODS Checklist: Significance  
[yes/no/maybe]
