# Supplementary material for: Infection and mortality of healthcare workers worldwide from COVID-19: a systematic review
Source: PubMed Central journal article supplement — BMJ Glob Health. 2020 Dec 4;5(12):e003097. doi: 10.1136/bmjgh-2020-003097 (PMC7722361; doi:10.1136/bmjgh-2020-003097), 2020-12-04
Supplement: bmjgh-2020-003097supp005.pdf [file bmjgh-2020-003097supp005.pdf]

**Appendix S5: The type and specific data points extracted in the systematic review process**

| <b>Data extracted</b>                              |                                                                                                                                                                                   |
|----------------------------------------------------|-----------------------------------------------------------------------------------------------------------------------------------------------------------------------------------|
| <b>Publication characteristics</b>                 | Title of publication<br>Year published<br>Authors<br>Country of origin<br>Type of publication                                                                                     |
| <b>Country-specific data</b>                       | Total number of healthcare workers<br>Total population<br>Number of total hospital beds available<br>Number of intensive care unit beds and ventilators available                 |
| <b>COVID-19 specific data</b>                      | Number of nationwide cases<br>Number of COVID-19 tests performed<br>Number of intensive care unit admissions<br>Mortality rates<br>Average length time for symptoms and admission |
| <b>Demographics of affected healthcare workers</b> | Age, sex, ethnicity, stage of training and role of each affected healthcare worker                                                                                                |
| <b>Public health measures</b>                      | Social distancing strategies<br>Testing, self-isolation and contact tracing<br>Travel restrictions<br>Stay at home orders                                                         |
| <b>Publication characteristics</b>                 | Title of publication<br>Year published<br>Authors<br>Country of origin<br>Type of publication                                                                                     |
