# Supplementary material for: Infection and mortality of healthcare workers worldwide from COVID-19: a systematic review
Source: PubMed Central journal article supplement — BMJ Glob Health. 2020 Dec 4;5(12):e003097. doi: 10.1136/bmjgh-2020-003097 (PMC7722361; doi:10.1136/bmjgh-2020-003097), 2020-12-04
Supplement: bmjgh-2020-003097supp007.pdf [file bmjgh-2020-003097supp007.pdf]

| Reference                    | A State of Emergency in A | About Coronavirus Diseas  | About Hungary - Prime M    |
|------------------------------|---------------------------|---------------------------|----------------------------|
| Link to data source          | m/a-state-of-emergency-b  | /stf/seisakunitsuite/buny | r-viktor-orbans-address-to |
| Checklist: Authority [yes/n  | y                         | y                         | y                          |
| Checklist: Accuracy [yes/n   | y                         | y                         | m                          |
| Checklist: Coverage [yes/n   | y                         | y                         | y                          |
| hecklist: Objectivity [yes/r | y                         | y                         | y                          |
| S Checklist: Date [yes/no/   | y                         | y                         | y                          |
| hecklist: Significance [yes/ | y                         | y                         | y                          |
| Publication Type             | Government document       | Government Document       | Government document        |

|                                                                                                                                        |                                                   |                                                                                                                            |                                                                                                                                         |
|----------------------------------------------------------------------------------------------------------------------------------------|---------------------------------------------------|----------------------------------------------------------------------------------------------------------------------------|-----------------------------------------------------------------------------------------------------------------------------------------|
| Actualité [Internet]. [cited 2020 Aug 10]. Available from: <a href="https://www.e.gov.ma/pages/actualite">e.gov.ma/pages/actualite</a> | Another 445 coronavirus cases reported in Morocco | <a href="https://www.attualita.it/Contagio-Coronavirus-aggiornamenti">attualita.it. Contagio Coronavirus aggiornamenti</a> | <a href="https://www.australian.gov.au/resources/publications/coronavirus">Australian Government Department of Health and Aged Care</a> |
| y                                                                                                                                      | m                                                 | y                                                                                                                          | Y                                                                                                                                       |
| y                                                                                                                                      | y                                                 | m                                                                                                                          | Y                                                                                                                                       |
| y                                                                                                                                      | m                                                 | y                                                                                                                          | Y                                                                                                                                       |
| y                                                                                                                                      | y                                                 | y                                                                                                                          | Y                                                                                                                                       |
| y                                                                                                                                      | y                                                 | y                                                                                                                          | Y                                                                                                                                       |
| y                                                                                                                                      | y                                                 | y                                                                                                                          | Y                                                                                                                                       |
| Government Document                                                                                                                    | Government Document                               | Government Document                                                                                                        | Government Document                                                                                                                     |

|                                 |                                                                                                                 |                            |                       |
|---------------------------------|-----------------------------------------------------------------------------------------------------------------|----------------------------|-----------------------|
| Australian Government Document  | Bộ Y tế. Trang tin về dịch                                                                                      | Boletín Estadístico del RC | Communiqué du Conseil |
| https://health-alerts/novel-cor | <a href="https://ncov.moh.gov.vn/tal/fucionpublica/fucion">https://ncov.moh.gov.vn/tal/fucionpublica/fucion</a> |                            | 1586513095Communiqué  |
| y                               | y                                                                                                               | y                          | y                     |
| y                               | m                                                                                                               | y                          | y                     |
| y                               | y                                                                                                               | y                          | y                     |
| y                               | y                                                                                                               | y                          | y                     |
| y                               | y                                                                                                               | y                          | y                     |
| y                               | y                                                                                                               | y                          | y                     |
| Government Document             | Government document                                                                                             | Government Document        | Government Document   |

|                          |                           |                           |                         |
|--------------------------|---------------------------|---------------------------|-------------------------|
| Corona Virus Disease (CO | Coronavirus – gob.mx [Int | Coronavirus - Novel Coron | CORONAVIRUS (COVID-19   |
| go.th/viralpneumonia/en  | mx/salud/documentos/nh    | Awareness/ EducationalC   | d2jsqrio60m94k.cloudfro |
| y                        | y                         | y                         | y                       |
| y                        | y                         | y                         | y                       |
| y                        | y                         | y                         | y                       |
| y                        | y                         | y                         | y                       |
| y                        | y                         | y                         | y                       |
| y                        | y                         | y                         | y                       |
| Government Document      | Government document       | Government Document       | Government Document     |

|                           |                                             |                          |                          |
|---------------------------|---------------------------------------------|--------------------------|--------------------------|
| Coronavirus (COVID-19) in | Coronavirus (COVID-19): g                   | Coronavirus COVID-19. Ho | Coronavirus in Germany [ |
| 2.257548813.784196726.    | <a href="#">topical-events/ coronavirus</a> | //www.info-coronavirus.b | .de/en/news/coronavirus  |
| y                         | y                                           | y                        | y                        |
| y                         | y                                           | y                        | y                        |
| y                         | y                                           | y                        | y                        |
| y                         | y                                           | y                        | y                        |
| y                         | y                                           | y                        | y                        |
| y                         | y                                           | y                        | y                        |
| Government Document       | Government Document                         | Government Document      | Government Document      |

| CORONAVIRUS INFECTION                                             | COVID 19 Updates ... Cas                                    | COVID-19 - Informacion s                                    | COVID-19 - Yeni Koronavi                                            |
|-------------------------------------------------------------------|-------------------------------------------------------------|-------------------------------------------------------------|---------------------------------------------------------------------|
| <a href="https://coronavirus.uz/en">https://coronavirus.uz/en</a> | <a href="ona.e.gov.kw/En/Home/C">ona.e.gov.kw/En/Home/C</a> | <a href="www.mspbs.gov.py/covid">www.mspbs.gov.py/covid</a> | <a href="://covid19bilgi.saglik.gov">://covid19bilgi.saglik.gov</a> |
| y                                                                 | y                                                           | y                                                           | y                                                                   |
| y                                                                 | m                                                           | y                                                           | m                                                                   |
| y                                                                 | y                                                           | y                                                           | y                                                                   |
| y                                                                 | y                                                           | y                                                           | m                                                                   |
| y                                                                 | y                                                           | y                                                           | y                                                                   |
| y                                                                 | y                                                           | y                                                           | y                                                                   |
| Government document                                               | Government Document                                         | Government document                                         | Government document                                                 |

|                                                                                                                           |                                                                                                           |                                                                         |                               |
|---------------------------------------------------------------------------------------------------------------------------|-----------------------------------------------------------------------------------------------------------|-------------------------------------------------------------------------|-------------------------------|
| COVID19 en Guatemala [Internet].                                                                                          | COVID19 Home [Internet].                                                                                  | COVID-19 Honduras - Official                                            | COVID-19: Singapore confirmed |
| <a href="http://www.gub.gob.gt/index.php/noticias/comunicacion">http://www.gub.gob.gt/index.php/noticias/comunicacion</a> | <a href="http://www.gov.qa/english/Pages/COVID-19.aspx">http://www.gov.qa/english/Pages/COVID-19.aspx</a> | <a href="https://covid19honduras.org/">https://covid19honduras.org/</a> | DSEFSR0VEJTNCKzU5NitC         |
| y                                                                                                                         | y                                                                                                         | y                                                                       | y                             |
| y                                                                                                                         | y                                                                                                         | y                                                                       | y                             |
| y                                                                                                                         | y                                                                                                         | y                                                                       | y                             |
| y                                                                                                                         | y                                                                                                         | y                                                                       | y                             |
| y                                                                                                                         | y                                                                                                         | y                                                                       | y                             |
| y                                                                                                                         | y                                                                                                         | y                                                                       | y                             |
| Government Document                                                                                                       | Government Document                                                                                       | Government Document                                                     | Government Document           |

|                          |                           |                         |                         |
|--------------------------|---------------------------|-------------------------|-------------------------|
| Danish Health Authority. | De M, Pública S, De D, Mé | Departamento de Salud d | Department of Health we |
| ps://www.sst.dk/corona-  | ario-Electr%C3%B3nico-E   | salud.gov.pr/Pages/coro | //www.doh.gov.ph/2019-  |
| y                        | y                         | y                       | y                       |
| y                        | y                         | y                       | y                       |
| y                        | y                         | y                       | y                       |
| y                        | y                         | y                       | y                       |
| y                        | y                         | y                       | y                       |
| y                        | y                         | y                       | y                       |
| Government document      | Government Document       | Government Document     | Government document     |



|                         |                                                                 |                                                               |                           |
|-------------------------|-----------------------------------------------------------------|---------------------------------------------------------------|---------------------------|
| Department of Health we | Epidemia COVID-19.                                              | Epidemiological Surveillan                                    | Eritrea: Announcement Fr  |
| www.doh.gov.ph/covid19  | <a href="https://www.epicentro.is">https://www.epicentro.is</a> | <a href="https://www.pio.gov.cy/">https://www.pio.gov.cy/</a> | frica.com/stories/2020082 |
| y                       | y                                                               | m                                                             | y                         |
| y                       | y                                                               | y                                                             | m                         |
| y                       | y                                                               | y                                                             | y                         |
| y                       | y                                                               | y                                                             | y                         |
| y                       | y                                                               | y                                                             | y                         |
| y                       | y                                                               | y                                                             | y                         |
| Government document     | Government Document                                             | Government document                                           | Government Document       |

|                              |                                |                            |                             |
|------------------------------|--------------------------------|----------------------------|-----------------------------|
| FMOH. COVID-19 Press Release | Gobierno de Chile. Coronavirus | Gobierno del Perú. Conocer | gov.ie - Statement from the |
| www.moh.gov.et/ejcc/en/news  | ://www.gob.cl/coronavirus/     | campa%C3%B1as/699-c        | statement-from-the-natio    |
| y                            | y                              | y                          | y                           |
| y                            | y                              | y                          | y                           |
| y                            | y                              | y                          | y                           |
| y                            | y                              | y                          | y                           |
| y                            | y                              | y                          | y                           |
| y                            | y                              | y                          | y                           |
| Government document          | Government document            | Government Document        | Government document         |

| Government of Antigua and Barbuda                   | Government of Canada. COVID-19                                                                | Government of Canada. COVID-19                                                                | Government of India. #Ind                                                   |
|-----------------------------------------------------|-----------------------------------------------------------------------------------------------|-----------------------------------------------------------------------------------------------|-----------------------------------------------------------------------------|
| <a href="https://ab.gov.ag/">https://ab.gov.ag/</a> | <a href="https://health.services/diseases/2019-nCoV/">health/services/diseases/2019-nCoV/</a> | <a href="https://health.services/diseases/2019-nCoV/">health/services/diseases/2019-nCoV/</a> | <a href="https://www.mygov.in/covid-19/">https://www.mygov.in/covid-19/</a> |
| y                                                   | y                                                                                             | y                                                                                             | y                                                                           |
| y                                                   | y                                                                                             | y                                                                                             | y                                                                           |
| y                                                   | y                                                                                             | y                                                                                             | y                                                                           |
| y                                                   | y                                                                                             | y                                                                                             | y                                                                           |
| y                                                   | y                                                                                             | y                                                                                             | y                                                                           |
| y                                                   | y                                                                                             | y                                                                                             | y                                                                           |
| Government Document                                 | Government Document                                                                           | Government Document                                                                           | Government Document                                                         |

|                             |                                 |                             |                                    |
|-----------------------------|---------------------------------|-----------------------------|------------------------------------|
| Government.nl. 122 patients | Government.nl. Coronavirus      | HealthManagement.org.       | Israel Ministry of Health.         |
| 4/122-patients-deceased     | overnment.nl/topics/coronavirus | c/hospital/issuearticle/the | .il/ministry-of-health/coronavirus |
| y                           | y                               | y                           | y                                  |
| y                           | y                               | n                           | y                                  |
| y                           | y                               | y                           | y                                  |
| y                           | y                               | y                           | y                                  |
| y                           | y                               | y                           | y                                  |
| y                           | y                               | y                           | y                                  |
| Government Document         | Government Document             | Government document         | Government document                |

| Ministère de la Santé Pub                                       | Ministère de la Santé Pub                                     | Ministère de la santé pub                                                                                               | Ministério da Saúde [Inter                                      |
|-----------------------------------------------------------------|---------------------------------------------------------------|-------------------------------------------------------------------------------------------------------------------------|-----------------------------------------------------------------|
| <a href="https://www.mspp.gouv.ht">https://www.mspp.gouv.ht</a> | <a href="http://sante-tchad.org/">http://sante-tchad.org/</a> | <a href="https://www.msp.chad/actualites-les-actualites/1059-">https://www.msp.chad/actualites-les-actualites/1059-</a> | <a href="http://www.saude.gov.br/">http://www.saude.gov.br/</a> |
| y                                                               | y                                                             | y                                                                                                                       | y                                                               |
| y                                                               | y                                                             | y                                                                                                                       | y                                                               |
| y                                                               | y                                                             | y                                                                                                                       | y                                                               |
| y                                                               | y                                                             | y                                                                                                                       | y                                                               |
| y                                                               | m                                                             | y                                                                                                                       | y                                                               |
| y                                                               | y                                                             | y                                                                                                                       | y                                                               |
| Government document                                             | Government Document                                           | Government document                                                                                                     | Government Document                                             |

|                           |                             |                             |                           |
|---------------------------|-----------------------------|-----------------------------|---------------------------|
| Ministerio de Salud de la | Ministerio de Salud Pública | Ministerio de Salud Pública | Ministry of Health & Well |
| sa.gob.pa/destacado/coron | w.salud.gob.ec/coronavir    | b.uy/ministerio-salud-pub   | p?PAR_MENU_ID=1007&f      |
| y                         | y                           | y                           | y                         |
| y                         | y                           | y                           | y                         |
| y                         | y                           | y                           | n                         |
| y                         | y                           | y                           | m                         |
| y                         | y                           | y                           | y                         |
| y                         | y                           | y                           | y                         |
| Government Document       | Government Document         | Government document         | Government Document       |

| Ministry of Health & Well  | Ministry of Health NZ. 20 | Ministry of Health NZ. 50 | Ministry of Health NZ. 9 n |
|----------------------------|---------------------------|---------------------------|----------------------------|
| d-cases-of-covid-19-in-jan | /news-media/media-relea   | /news-media/media-releaz  | /news-media/media-rele     |
| y                          | y                         | y                         | y                          |
| y                          | y                         | y                         | y                          |
| y                          | m                         | m                         | m                          |
| y                          | y                         | y                         | y                          |
| y                          | y                         | y                         | y                          |
| y                          | y                         | y                         | y                          |
| Government Document        | Government Document       | Government Document       | Government Document        |

|                              |                           |                           |                            |
|------------------------------|---------------------------|---------------------------|----------------------------|
| Ministry of Health Singapore | MINISTRY OF HEALTH. UP    | MOH Alert: Corona virus I | ONMNE Tunisie. Préventi    |
| s://www.moh.gov.sg/covi      | virus-disease-2019-covid- | m/en/-/moh-alert-corona   | ne.tn/fr/publications.php? |
| y                            | y                         | y                         | y                          |
| y                            | m                         | y                         | y                          |
| y                            | y                         | y                         | y                          |
| y                            | y                         | y                         | y                          |
| y                            | y                         | y                         | y                          |
| y                            | y                         | y                         | y                          |
| Government document          | Government document       | Government Document       | Government document        |



|                                                                                                                    |                                                                                                                                                                                          |                          |                           |
|--------------------------------------------------------------------------------------------------------------------|------------------------------------------------------------------------------------------------------------------------------------------------------------------------------------------|--------------------------|---------------------------|
| Paraguay [Internet]. [cited 2020.03.20]. Available from: <a href="https://stopcov.ge/en">https://stopcov.ge/en</a> | PCBS [Internet]. [cited 2020.03.20]. Available from: <a href="https://pcbs.gov.ps/default.asp?press-releases-sri-lanka/1">https://pcbs.gov.ps/default.asp?press-releases-sri-lanka/1</a> | Press Release 2020.03.20 | Prevention of Coronavirus |
| y                                                                                                                  | y                                                                                                                                                                                        | y                        | y                         |
| y                                                                                                                  | y                                                                                                                                                                                        | y                        | m                         |
| y                                                                                                                  | y                                                                                                                                                                                        | y                        | y                         |
| y                                                                                                                  | y                                                                                                                                                                                        | y                        | y                         |
| y                                                                                                                  | y                                                                                                                                                                                        | y                        | y                         |
| y                                                                                                                  | y                                                                                                                                                                                        | y                        | y                         |
| Government document                                                                                                | Government document                                                                                                                                                                      | Government Document      | Government document       |

|                         |                             |                             |                            |
|-------------------------|-----------------------------|-----------------------------|----------------------------|
| Salomón Nguema Owono    | Serbia reports a total of 4 | Serbia reports a total of 5 | Services M of H and C. The |
| aequatorialpress.com/no | 154229/serbia-reports-a-t   | 154514/serbia-reports-a-t   | n.no/en/topics/koronavir   |
| y                       | y                           | y                           | y                          |
| m                       | y                           | y                           | y                          |
| y                       | m                           | y                           | y                          |
| y                       | y                           | y                           | y                          |
| y                       | y                           | y                           | y                          |
| y                       | y                           | y                           | y                          |
| Government document     | Government document         | Government document         | Government document        |

|                                                                                                               |                                                                   |                                                                                           |                                                                 |
|---------------------------------------------------------------------------------------------------------------|-------------------------------------------------------------------|-------------------------------------------------------------------------------------------|-----------------------------------------------------------------|
| Sistema Nacional de Emergencias                                                                               | Surveillance de la COVID-19                                       | Tableau Public. COVID19                                                                   | Taiwan Centers for Disease Control and Prevention               |
| <a href="https://www.gub.uy/sistema-nacional-emergencias">https://www.gub.uy/sistema-nacional-emergencias</a> | <a href="https://covid19haiti.com/">https://covid19haiti.com/</a> | <a href="https://dneais.msp.gov.do/vizhome/COVID19">dneais.msp.gov.do/vizhome/COVID19</a> | <a href="https://www.cdc.gov.tw/E">https://www.cdc.gov.tw/E</a> |
| y                                                                                                             | y                                                                 | y                                                                                         | y                                                               |
| y                                                                                                             | m                                                                 | m                                                                                         | y                                                               |
| y                                                                                                             | y                                                                 | m                                                                                         | y                                                               |
| y                                                                                                             | y                                                                 | y                                                                                         | y                                                               |
| y                                                                                                             | y                                                                 | y                                                                                         | y                                                               |
| y                                                                                                             | y                                                                 | y                                                                                         | y                                                               |
| Government document                                                                                           | Government document                                               | Government Document                                                                       | Government document                                             |

|                          |                           |                          |                                                                           |
|--------------------------|---------------------------|--------------------------|---------------------------------------------------------------------------|
| THE HEALTH SECTOR IN G   | The National Taskforce fo | THL. Coronavirus COVID-1 | Tunisie S, Chiffres E. Répu                                               |
| hservice.org/downloads/F | tsmeasurestakentomitiga   | diseases/what-s-new/cor  | <a href="https://tunisie.rns.tn/images/dep">tunisie.rns.tn/images/dep</a> |
| y                        | y                         | y                        | y                                                                         |
| m                        | y                         | y                        | y                                                                         |
| y                        | y                         | y                        | y                                                                         |
| y                        | y                         | y                        | y                                                                         |
| y                        | y                         | y                        | y                                                                         |
| y                        | y                         | y                        | y                                                                         |
| Government document      | Government document       | Government Document      | Government document                                                       |

|                              |                         |                          |                          |
|------------------------------|-------------------------|--------------------------|--------------------------|
| U.S. Embassy in Latvia. CC   | UAE Coronavirus (COVID- | Wikipedia. COVID-19 pand | Wikipedia. COVID-19 pand |
| sembassy.gov/covid-19-ins:// | covid19.ncema.gov.ae    | g/wiki/2020_coronavirus  | g/wiki/2020_coronavirus  |
| m                            | m                       | n                        | n                        |
| m                            | m                       | m                        | m                        |
| y                            | m                       | y                        | y                        |
| y                            | m                       | m                        | m                        |
| y                            | m                       | y                        | y                        |
| y                            | m                       | y                        | y                        |
| Government document          | Government document     | Government Document      | Government Document      |

|                              |                              |                              |                              |
|------------------------------|------------------------------|------------------------------|------------------------------|
| Wikipedia. COVID-19 pandemic | Wikipedia. COVID-19 pandemic | Wikipedia. COVID-19 pandemic | Wikipedia. COVID-19 pandemic |
| g/wiki/2020_coronavirus      | g/wiki/2020_coronavirus      | g/wiki/2020_coronavirus      | g/wiki/2020_coronavirus      |
| n                            | n                            | n                            | n                            |
| m                            | m                            | m                            | m                            |
| y                            | y                            | y                            | y                            |
| m                            | m                            | m                            | m                            |
| y                            | y                            | y                            | y                            |
| y                            | y                            | y                            | y                            |
| Government Document          | Government Document          | Government Document          | Government Document          |

|                              |                              |                           |                         |
|------------------------------|------------------------------|---------------------------|-------------------------|
| Wikipedia. COVID-19 pandemic | Wikipedia. COVID-19 pandemic | YouTube. 22 April 2020: S | Νέος κορωνοϊός Covid-19 |
| /2020_coronavirus_pand       | 2020_coronavirus_pandem      | .youtube.com/watch?v=K    | dy.gov.gr/neos-koronaio |
| n                            | n                            | y                         | y                       |
| m                            | m                            | y                         | y                       |
| y                            | y                            | y                         | y                       |
| m                            | y                            | y                         | y                       |
| y                            | y                            | y                         | y                       |
| y                            | y                            | y                         | y                       |
| Government Document          | Government Document          | Government Document       | Government document     |

|                          |                           |                            |                           |
|--------------------------|---------------------------|----------------------------|---------------------------|
| Информация за граждан    | Коронавірус 2019-пCoV     | Минздрав России. Корона    | Публикации [Internet]. [c |
| government.bg/bg/informa | noz.gov.ua/koronavirus-20 | www.rosminzdrav.ru/ministe | elstat.gov.by/homep/ru/p  |
| у                        | у                         | у                          | у                         |
| у                        | у                         | у                          | у                         |
| у                        | у                         | у                          | у                         |
| у                        | у                         | у                          | у                         |
| у                        | у                         | у                          | у                         |
| у                        | у                         | у                          | у                         |
| Government document      | Government document       | Government document        | Government document       |



|                               |                                                                                  |                                                                                                                                                                                                     |                                                                       |
|-------------------------------|----------------------------------------------------------------------------------|-----------------------------------------------------------------------------------------------------------------------------------------------------------------------------------------------------|-----------------------------------------------------------------------|
| Эпидситуация по COVID-19      | ຄະນະສະເພາະກົວ COVID-19                                                           | Government updates Finland                                                                                                                                                                          | GovHK: Residents [Internet]                                           |
| 84-epidsituatsiya-po-covid-19 | <a href="http://www.covid19.gov.la/index.html">www.covid19.gov.la/index.html</a> | <a href="https://www.government.fi/en/strategy-for-preventing-and-controlling-the-spread-of-coronavirus">www.government.fi/en/strategy-for-preventing-and-controlling-the-spread-of-coronavirus</a> | <a href="https://www.gov.hk/en/residents">www.gov.hk/en/residents</a> |
| y                             | y                                                                                | y                                                                                                                                                                                                   | y                                                                     |
| y                             | m                                                                                | m                                                                                                                                                                                                   | y                                                                     |
| y                             | y                                                                                | y                                                                                                                                                                                                   | y                                                                     |
| y                             | y                                                                                | y                                                                                                                                                                                                   | y                                                                     |
| y                             | y                                                                                | y                                                                                                                                                                                                   | y                                                                     |
| y                             | y                                                                                | y                                                                                                                                                                                                   | y                                                                     |
| Government document           | Government document                                                              | Government report                                                                                                                                                                                   | Government report                                                     |

|                            |                         |                           |                           |
|----------------------------|-------------------------|---------------------------|---------------------------|
| Ministru kabinetes. Govern | USAGov. Government Res  | Africanews. Coronavirus - | Argentina.gob.ar. Corona  |
| ernment-extends-precauti   | s://www.usa.gov/coronav | n/2020/03/26/coronaviru   | entina.gob.ar/salud/coron |
| y                          | y                       | y                         | y                         |
| y                          | y                       | m                         | y                         |
| y                          | y                       | y                         | y                         |
| y                          | y                       | y                         | y                         |
| y                          | y                       | y                         | y                         |
| y                          | y                       | y                         | y                         |
| Government report          | Government report       | Government website        | Government website        |

|                             |                          |                            |                           |
|-----------------------------|--------------------------|----------------------------|---------------------------|
| Argentina.gob.ar. Informe   | Bundesministerium für So | Cổng thông tin Bộ Y tế. Tr | Coronavirus (COVID-19) -  |
| gentina.gob.ar/coronavirus: | ://www.sozialministerium | https://www.moh.gov.vn/    | .australia.gov.au/coronav |
| y                           | y                        | y                          | y                         |
| y                           | y                        | y                          | y                         |
| y                           | y                        | y                          | y                         |
| y                           | y                        | y                          | y                         |
| y                           | y                        | y                          | y                         |
| y                           | y                        | y                          | y                         |
| Government website          | Government website       | Government website         | Government website        |

| Coronavirus COVID-19 - Ministry of Health                                     | Coronavirus Disease 2019                                                  | Coronavirus: COVID-19 [Irish Government]                              | COVID-19 - Ministry of Foreign Affairs                          |
|-------------------------------------------------------------------------------|---------------------------------------------------------------------------|-----------------------------------------------------------------------|-----------------------------------------------------------------|
| <a href="https://www.moh.gov.bh/?lang=en">https://www.moh.gov.bh/?lang=en</a> | <a href="https://gov.cy/coronavirus/en/pdf">gov.cy/coronavirus/en/pdf</a> | <a href="https://www.gouv.msan%2Ben%2Bdd">www.gouv.msan%2Ben%2Bdd</a> | <a href="https://www.mzv.sk/web/en/co">www.mzv.sk/web/en/co</a> |
| y                                                                             | y                                                                         | y                                                                     | y                                                               |
| y                                                                             | y                                                                         | y                                                                     | y                                                               |
| y                                                                             | y                                                                         | y                                                                     | y                                                               |
| y                                                                             | y                                                                         | y                                                                     | y                                                               |
| y                                                                             | y                                                                         | y                                                                     | y                                                               |
| y                                                                             | y                                                                         | y                                                                     | y                                                               |
| Government website                                                            | Government website                                                        | Government website                                                    | Government website                                              |

| COVID-19 – MINISTRY OF HEALTH                                                     | COVID-19 - National Institute of Health                                                         | COVID-19 - Página Inicial                                                         | COVID-19 : point épidémiologique                                                                                    |
|-----------------------------------------------------------------------------------|-------------------------------------------------------------------------------------------------|-----------------------------------------------------------------------------------|---------------------------------------------------------------------------------------------------------------------|
| <a href="https://www.health.go.ke/covid-19">https://www.health.go.ke/covid-19</a> | <a href="https://www.nih.org.pk/novel-coronavirus">https://www.nih.org.pk/novel-coronavirus</a> | <a href="https://covid19.min-saude.gouv.pt">https://covid19.min-saude.gouv.pt</a> | <a href="https://www.infectiologie.be/point-epidemiologique">https://www.infectiologie.be/point-epidemiologique</a> |
| y                                                                                 | y                                                                                               | y                                                                                 | y                                                                                                                   |
| y                                                                                 | y                                                                                               | y                                                                                 | y                                                                                                                   |
| y                                                                                 | y                                                                                               | y                                                                                 | y                                                                                                                   |
| y                                                                                 | y                                                                                               | y                                                                                 | y                                                                                                                   |
| y                                                                                 | y                                                                                               | y                                                                                 | y                                                                                                                   |
| y                                                                                 | y                                                                                               | y                                                                                 | y                                                                                                                   |
| Government website                                                                | Government website                                                                              | Government website                                                                | Government website                                                                                                  |

| COVID-19 [Internet]. [cite | COVID-19 [Internet]. [cite | COVID-19 [Internet]. [cite | COVID-19 [Internet]. [cite |
|----------------------------|----------------------------|----------------------------|----------------------------|
| alth.gov.tt/sitepages/defa | moh.gov.bn/SitePages/CO    | https://covid19.rs/        | //hsgm.saglik.gov.tr/tr/co |
| y                          | y                          | y                          | y                          |
| y                          | y                          | y                          | y                          |
| y                          | y                          | y                          | y                          |
| y                          | y                          | y                          | y                          |
| y                          | y                          | y                          | y                          |
| y                          | y                          | y                          | y                          |
| Government website         | Government website         | Government website         | Government website         |

| COVID-19 en Tunisie.                                                              | COVID-19 Health Advisory                                                              | COVID-19 MALAYSIA [Internet]                                                            | COVID-19 Malta [Internet]                                           |
|-----------------------------------------------------------------------------------|---------------------------------------------------------------------------------------|-----------------------------------------------------------------------------------------|---------------------------------------------------------------------|
| <a href="http://www.tn/fr/images/COVID-19-">http://www.tn/fr/images/COVID-19-</a> | <a href="https://covid.gov.pk/stats/pakistan">https://covid.gov.pk/stats/pakistan</a> | <a href="http://www.mv/index.php/pages/view/1">http://www.mv/index.php/pages/view/1</a> | <a href="https://covid19malta.info/">https://covid19malta.info/</a> |
| y                                                                                 | y                                                                                     | y                                                                                       | m                                                                   |
| y                                                                                 | y                                                                                     | y                                                                                       | n                                                                   |
| y                                                                                 | y                                                                                     | y                                                                                       | y                                                                   |
| y                                                                                 | y                                                                                     | y                                                                                       | y                                                                   |
| y                                                                                 | y                                                                                     | y                                                                                       | y                                                                   |
| y                                                                                 | y                                                                                     | y                                                                                       | y                                                                   |
| Government website                                                                | Government website                                                                    | Government website                                                                      | Government website                                                  |

| Covid-19 Reports - Minist | COVID-19 Updates [Intern | COVID-19 WEBINARS AND     | COVID-19, Australia: Epid |
|---------------------------|--------------------------|---------------------------|---------------------------|
| .lr/documents/reports/co  | ghanahealthservice.org/c | cnh.or.ke/index.php/sensi | 03000302EB/\$File/covid_  |
| y                         | y                        | y                         | y                         |
| y                         | y                        | m                         | y                         |
| y                         | y                        | y                         | y                         |
| y                         | y                        | y                         | y                         |
| y                         | y                        | y                         | y                         |
| y                         | y                        | y                         | y                         |
| Government website        | Government website       | Government website        | Government website        |



|                          |                        |                            |                                           |
|--------------------------|------------------------|----------------------------|-------------------------------------------|
| COVID-19: Confirmada a g | Cuadro 2. CAMAS, MÉDIC | Efendi F, Kurniati A. Huma | Epidemiology of COVID-19                  |
| 2-covid-19-confirmada-a- | pa/archivos/P057951862 | //Human_Resources_for_h    | <a href="#">novelcoronavirus/casesini</a> |
| y                        | y                      | y                          | y                                         |
| y                        | y                      | m                          | y                                         |
| y                        | y                      | y                          | y                                         |
| y                        | y                      | y                          | y                                         |
| y                        | y                      | y                          | y                                         |
| y                        | y                      | y                          | y                                         |
| Government website       | Government website     | Government website         | Government website                        |

|                                               |                           |                           |                          |
|-----------------------------------------------|---------------------------|---------------------------|--------------------------|
| Fiji Bureau of Statistics. Fl                 | Five more die from coron  | FNOMCeO. Elenco dei Me    | Folkhälsomyndigheten. Co |
| iLCJzdGF0aXN0aWNzliwiden/154301/five-more-die | co-dei-medici-caduti-nel- | dw.folkhalsomyndigheten.s |                          |
| y                                             | y                         | y                         | y                        |
| m                                             | y                         | y                         | y                        |
| y                                             | m                         | m                         | y                        |
| y                                             | y                         | y                         | y                        |
| y                                             | y                         | y                         | y                        |
| y                                             | y                         | y                         | y                        |
| Government website                            | Government website        | Government website        | Government website       |

|                           |                           |                           |                           |
|---------------------------|---------------------------|---------------------------|---------------------------|
| GIS. Emergency Management | Gouvernement.fr. corona   | Gouvernement.fr. corona   | gov.ie - COVID-19 (Corona |
| emergency-management-co   | gouvernement.fr/en/corona | gouvernement.fr/en/corona | en/campaigns/c36c85-co    |
| y                         | y                         | y                         | y                         |
| y                         | y                         | m                         | y                         |
| y                         | y                         | y                         | y                         |
| y                         | y                         | y                         | y                         |
| y                         | y                         | y                         | y                         |
| y                         | y                         | y                         | y                         |
| Government website        | Government website        | Government website        | Government website        |

|                              |                          |                           |                           |
|------------------------------|--------------------------|---------------------------|---------------------------|
| gov.ie - Health in Ireland - | gov.sg   COVID-19 (Coron | Government installation p | Government of Iceland     |
| blication/f1bb64-health-ir   | //www.gov.sg/features/co | www.terviseamet.ee/en/    | vernment.is/ministries/mi |
| y                            | y                        | y                         | y                         |
| m                            | y                        | y                         | y                         |
| y                            | y                        | y                         | y                         |
| y                            | y                        | y                         | y                         |
| y                            | y                        | y                         | y                         |
| y                            | y                        | y                         | y                         |
| Government website           | Government website       | Government website        | Government website        |

| Government of the Republic of South Africa | Health and safety statistics | Health Department Secretariat | Health Statistical Abstract |
|--------------------------------------------|------------------------------|-------------------------------|-----------------------------|
| 27-new-covid-19-cases-on                   | statistics/health-and-safety | Health-Department-Annual      | spx?fileticket=DqG7ly5-sG   |
| y                                          | y                            | y                             | y                           |
| y                                          | y                            | y                             | m                           |
| y                                          | y                            | y                             | y                           |
| y                                          | y                            | y                             | m                           |
| y                                          | y                            | y                             | y                           |
| y                                          | y                            | y                             | y                           |
| Government website                         | Government website           | Government website            | Government website          |

| Healthcare - Official Statistics | Healthcare Resource Guide | Healthcare Resource Guide | Healthcare Resource Guide |
|----------------------------------|---------------------------|---------------------------|---------------------------|
| stat.kg/en/statistics/zdravy     | /health/healthcareresour  | /health/healthcareresour  | /health/healthcareresou   |
| y                                | n                         | y                         | n                         |
| y                                | n                         | m                         | n                         |
| y                                | y                         | y                         | y                         |
| y                                | y                         | y                         | y                         |
| y                                | n                         | y                         | y                         |
| y                                | y                         | y                         | y                         |
| Government website               | Government website        | Government website        | Government website        |

|                           |                                                                                                                                   |                                                                                                                                            |                                                                                                                                                                                        |
|---------------------------|-----------------------------------------------------------------------------------------------------------------------------------|--------------------------------------------------------------------------------------------------------------------------------------------|----------------------------------------------------------------------------------------------------------------------------------------------------------------------------------------|
| Info Infeksi Emerging Kem | INICIO [Internet]. [cited 2020 Jun 15]; available from: <a href="https://covid19.kemkes.go.id/">https://covid19.kemkes.go.id/</a> | Jamaica Information Service [Internet]. [cited 2020 Jun 15]; available from: <a href="http://www.mpps.gov.jm/">http://www.mpps.gov.jm/</a> | Jamaica Information Service [Internet]. [cited 2020 Jun 15]; available from: <a href="https://www.gov.jm/jamaica-and-the-caribbean/">https://www.gov.jm/jamaica-and-the-caribbean/</a> |
| y                         | y                                                                                                                                 | y                                                                                                                                          | y                                                                                                                                                                                      |
| y                         | y                                                                                                                                 | y                                                                                                                                          | y                                                                                                                                                                                      |
| y                         | y                                                                                                                                 | y                                                                                                                                          | y                                                                                                                                                                                      |
| y                         | y                                                                                                                                 | y                                                                                                                                          | y                                                                                                                                                                                      |
| y                         | y                                                                                                                                 | y                                                                                                                                          | y                                                                                                                                                                                      |
| y                         | y                                                                                                                                 | y                                                                                                                                          | y                                                                                                                                                                                      |
| Government website        | Government website                                                                                                                | Government website                                                                                                                         | Government website                                                                                                                                                                     |

|                                                                                                                                    |                                                                                                                                                     |                                                                                                                                              |                                                                                                                                                                                                              |
|------------------------------------------------------------------------------------------------------------------------------------|-----------------------------------------------------------------------------------------------------------------------------------------------------|----------------------------------------------------------------------------------------------------------------------------------------------|--------------------------------------------------------------------------------------------------------------------------------------------------------------------------------------------------------------|
| Koronavírus [Internet]. [cited 2020 Oct 15]. Available from: <a href="https://koronavirus.gov.hu/">https://koronavirus.gov.hu/</a> | Koronawirus: informacje [Internet]. [cited 2020 Oct 15]. Available from: <a href="http://www.gov.pl/web/koronawirus">www.gov.pl/web/koronawirus</a> | Koroonakaart. Statistika keskuste [Internet]. [cited 2020 Oct 15]. Available from: <a href="https://koroona.ee/en">https://koroona.ee/en</a> | Kyrgyzstan imposes entry restrictions [Internet]. [cited 2020 Oct 15]. Available from: <a href="https://www.kyrgyzstan.gov.kg/en/entry-restrictions">https://www.kyrgyzstan.gov.kg/en/entry-restrictions</a> |
| y                                                                                                                                  | y                                                                                                                                                   | y                                                                                                                                            | y                                                                                                                                                                                                            |
| y                                                                                                                                  | y                                                                                                                                                   | m                                                                                                                                            | y                                                                                                                                                                                                            |
| y                                                                                                                                  | y                                                                                                                                                   | y                                                                                                                                            | y                                                                                                                                                                                                            |
| y                                                                                                                                  | y                                                                                                                                                   | y                                                                                                                                            | y                                                                                                                                                                                                            |
| y                                                                                                                                  | y                                                                                                                                                   | y                                                                                                                                            | y                                                                                                                                                                                                            |
| y                                                                                                                                  | y                                                                                                                                                   | y                                                                                                                                            | y                                                                                                                                                                                                            |
| Government website                                                                                                                 | Government website                                                                                                                                  | Government website                                                                                                                           | Government website                                                                                                                                                                                           |



|                                                                                                                             |                                                                                                                                                                                         |                                                                                                                                                                                                                                                    |                                                                                                                                                                                                                         |
|-----------------------------------------------------------------------------------------------------------------------------|-----------------------------------------------------------------------------------------------------------------------------------------------------------------------------------------|----------------------------------------------------------------------------------------------------------------------------------------------------------------------------------------------------------------------------------------------------|-------------------------------------------------------------------------------------------------------------------------------------------------------------------------------------------------------------------------|
| LAOSIS [Internet]. [cited 2020 Jun 15]. Available from: <a href="https://laosis.lsb.gov.la/">https://laosis.lsb.gov.la/</a> | Lesotho travel advice - GOV.UK [Internet]. [cited 2020 Jun 15]. Available from: <a href="https://www.gov.uk/foreign-travel-advice/lesotho">www.gov.uk/foreign-travel-advice/lesotho</a> | Lineamientos Nacionales de Salud Pública 2020 [Internet]. [cited 2020 Jun 15]. Available from: <a href="https://www.minsa.gob.pe/lineamientos-nacionales-de-salud-publica-2020">www.minsa.gob.pe/lineamientos-nacionales-de-salud-publica-2020</a> | May 2019 National Occupational Employment and Unemployment Statistics [Internet]. [cited 2020 Jun 15]. Available from: <a href="http://www.bls.gov/oes/current/oes190500.htm">www.bls.gov/oes/current/oes190500.htm</a> |
| y                                                                                                                           | y                                                                                                                                                                                       | y                                                                                                                                                                                                                                                  | y                                                                                                                                                                                                                       |
| m                                                                                                                           | y                                                                                                                                                                                       | y                                                                                                                                                                                                                                                  | m                                                                                                                                                                                                                       |
| y                                                                                                                           | y                                                                                                                                                                                       | y                                                                                                                                                                                                                                                  | y                                                                                                                                                                                                                       |
| y                                                                                                                           | y                                                                                                                                                                                       | y                                                                                                                                                                                                                                                  | y                                                                                                                                                                                                                       |
| y                                                                                                                           | y                                                                                                                                                                                       | y                                                                                                                                                                                                                                                  | y                                                                                                                                                                                                                       |
| y                                                                                                                           | y                                                                                                                                                                                       | y                                                                                                                                                                                                                                                  | y                                                                                                                                                                                                                       |
| Government website                                                                                                          | Government website                                                                                                                                                                      | Government website                                                                                                                                                                                                                                 | Government website                                                                                                                                                                                                      |

|                          |                                                             |                                                                       |                                                           |
|--------------------------|-------------------------------------------------------------|-----------------------------------------------------------------------|-----------------------------------------------------------|
| Media Center [Internet]. | Ministerial Statement by                                    | Ministerio de Salud - Bolivi                                          | Ministerio de Salud Pública                               |
| lb/en/Media/view/27459   | <a href="https://www.moh.gov.sg">https://www.moh.gov.sg</a> | <a href="https://www.minsalud.gob.bo">https://www.minsalud.gob.bo</a> | <a href="https://mspas.gob.gt/">https://mspas.gob.gt/</a> |
| y                        | y                                                           | y                                                                     | y                                                         |
| y                        | y                                                           | y                                                                     | m                                                         |
| y                        | y                                                           | y                                                                     | y                                                         |
| y                        | y                                                           | y                                                                     | y                                                         |
| y                        | y                                                           | y                                                                     | y                                                         |
| y                        | y                                                           | y                                                                     | y                                                         |
| Government website       | Government website                                          | Government website                                                    | Government website                                        |

|                            |                                                   |                                                             |                                                                 |
|----------------------------|---------------------------------------------------|-------------------------------------------------------------|-----------------------------------------------------------------|
| Ministerio de Sanidad, Co  | Ministerul Sănătății [Inter                       | Ministry of Health - Home                                   | MINISTRY OF HEALTH ANI                                          |
| onales/saludPublica/ ccaye | <a href="http://www.ms.ro/">http://www.ms.ro/</a> | <a href="https://health.gov.gy/">https://health.gov.gy/</a> | <a href="https://mohs.gov.mm/page/8">s://mohs.gov.mm/page/8</a> |
| y                          | y                                                 | y                                                           | y                                                               |
| y                          | y                                                 | m                                                           | y                                                               |
| y                          | y                                                 | y                                                           | m                                                               |
| y                          | y                                                 | y                                                           | y                                                               |
| y                          | y                                                 | y                                                           | y                                                               |
| y                          | y                                                 | y                                                           | y                                                               |
| Government website         | Government website                                | Government website                                          | Government website                                              |

|                                                                                  |                                                                                                              |                                                                                                                                        |                                                                                                           |
|----------------------------------------------------------------------------------|--------------------------------------------------------------------------------------------------------------|----------------------------------------------------------------------------------------------------------------------------------------|-----------------------------------------------------------------------------------------------------------|
| Ministry of health and welfare                                                   | Ministry of Health NZ. COVID-19                                                                              | Ministry of Health NZ. Health                                                                                                          | National COVID-19 surveillance                                                                            |
| <a href="http://www.mohw.go.kr/eng/index.html">www.mohw.go.kr/eng/index.html</a> | <a href="http://www.health.govt.nz/our-work/health-conditions-and-diseases">work/diseases-and-conditions</a> | <a href="http://www.health.govt.nz/our-work/health-conditions-and-diseases">health.govt.nz/our-work/health-conditions-and-diseases</a> | <a href="http://www.health.govt.nz/our-work/health-conditions-and-diseases">ent/publications/national</a> |
| y                                                                                | y                                                                                                            | y                                                                                                                                      | y                                                                                                         |
| y                                                                                | y                                                                                                            | y                                                                                                                                      | y                                                                                                         |
| y                                                                                | y                                                                                                            | y                                                                                                                                      | y                                                                                                         |
| y                                                                                | y                                                                                                            | y                                                                                                                                      | y                                                                                                         |
| y                                                                                | y                                                                                                            | y                                                                                                                                      | y                                                                                                         |
| y                                                                                | y                                                                                                            | y                                                                                                                                      | y                                                                                                         |
| Government website                                                               | Government website                                                                                           | Government website                                                                                                                     | Government website                                                                                        |

| National Health Commission                                | NCDC Coronavirus COVID                                              | Neues Coronavirus [Intern                                                 | Novel Coronavirus - Health                                      |
|-----------------------------------------------------------|---------------------------------------------------------------------|---------------------------------------------------------------------------|-----------------------------------------------------------------|
| <a href="http://en.nhc.gov.cn/">http://en.nhc.gov.cn/</a> | <a href="http://covid19.ncdc.gov.ng">http://covid19.ncdc.gov.ng</a> | <a href="https://www.usbrueche-epidemiem-par">usbrueche-epidemiem-par</a> | <a href="https://www.hpsc.ie/a-z/">https://www.hpsc.ie/a-z/</a> |
| y                                                         | y                                                                   | y                                                                         | y                                                               |
| y                                                         | y                                                                   | y                                                                         | y                                                               |
| y                                                         | y                                                                   | y                                                                         | y                                                               |
| y                                                         | y                                                                   | y                                                                         | y                                                               |
| y                                                         | y                                                                   | y                                                                         | y                                                               |
| y                                                         | y                                                                   | y                                                                         | y                                                               |
| Government website                                        | Government website                                                  | Government website                                                        | Government website                                              |

| Novel Coronavirus COVID   | Nuovo coronavirus [Intern | Portada - Ministerio de Sa                                   | Portal Oficial do Governo                                     |
|---------------------------|---------------------------|--------------------------------------------------------------|---------------------------------------------------------------|
| stry/novel_coronavirus_co | www.salute.gov.it/nuovoco | <a href="https://www.msp.gob.do/w">ps://www.msp.gob.do/w</a> | <a href="http://www.minsa.gov.ao">http://www.minsa.gov.ao</a> |
| y                         | y                         | y                                                            | y                                                             |
| y                         | y                         | y                                                            | y                                                             |
| y                         | y                         | y                                                            | y                                                             |
| y                         | y                         | y                                                            | y                                                             |
| y                         | y                         | y                                                            | y                                                             |
| y                         | y                         | y                                                            | y                                                             |
| Government website        | Government website        | Government website                                           | Government website                                            |

| ReliefWeb. National Preparedness                                                                                                                                        | RIVM. Current information                                               | Saudi Center for Disease Prevention and Control                     | Sistema Nacional de Emergencias y Desastres                                                         |
|-------------------------------------------------------------------------------------------------------------------------------------------------------------------------|-------------------------------------------------------------------------|---------------------------------------------------------------------|-----------------------------------------------------------------------------------------------------|
| <a href="https://reliefweb.int/national-preparedness-aus-covid-19/current-information">https://reliefweb.int/national-preparedness-aus-covid-19/current-information</a> | <a href="https://www.rivm.nl/covid-19">https://www.rivm.nl/covid-19</a> | <a href="https://www.cdc.gov/saudi/">https://www.cdc.gov/saudi/</a> | <a href="https://www.gub.uy/comunicados/informacion">https://www.gub.uy/comunicados/informacion</a> |
| y                                                                                                                                                                       | y                                                                       | y                                                                   | y                                                                                                   |
| y                                                                                                                                                                       | y                                                                       | y                                                                   | y                                                                                                   |
| y                                                                                                                                                                       | y                                                                       | y                                                                   | y                                                                                                   |
| y                                                                                                                                                                       | y                                                                       | y                                                                   | y                                                                                                   |
| y                                                                                                                                                                       | y                                                                       | m                                                                   | y                                                                                                   |
| y                                                                                                                                                                       | y                                                                       | y                                                                   | y                                                                                                   |
| Government website                                                                                                                                                      | Government website                                                      | Government website                                                  | Government website                                                                                  |

| South African Government                                                            | Tanzania Ministry of Health                           | The Government of the Bahamas                                | The Institute of Health Management Sciences                                                      |
|-------------------------------------------------------------------------------------|-------------------------------------------------------|--------------------------------------------------------------|--------------------------------------------------------------------------------------------------|
| <a href="http://www.gov.za/NovelCoronavirus">http://www.gov.za/NovelCoronavirus</a> | <a href="http://moh.go.tz/en">http://moh.go.tz/en</a> | <a href="http://www.bahamas.gov.bs/">www.bahamas.gov.bs/</a> | <a href="http://www.ihm.gov.bh/intranet/annonce/files">www.ihm.gov.bh/intranet/annonce/files</a> |
| y                                                                                   | y                                                     | y                                                            | y                                                                                                |
| y                                                                                   | y                                                     | y                                                            | m                                                                                                |
| y                                                                                   | y                                                     | y                                                            | y                                                                                                |
| y                                                                                   | y                                                     | y                                                            | y                                                                                                |
| y                                                                                   | y                                                     | y                                                            | y                                                                                                |
| y                                                                                   | y                                                     | y                                                            | y                                                                                                |
| Government website                                                                  | Government website                                    | Government website                                           | Government website                                                                               |



| The Libya Observer. National Centre for Safety and the Law | The Official Portal of the Italian Government | Tiscali Notizie. Coronavirus in Italia   | U.S. Embassy in Algeria. COVID-19 |
|------------------------------------------------------------|-----------------------------------------------|------------------------------------------|-----------------------------------|
| observer.ly/national-centre-for-safety-and-the-law         | governo.it                                    | notizie.tiscali.it/coronavirus-in-italia | embassy.gov/tag/covid-19          |
| y                                                          | y                                             | y                                        | m                                 |
| m                                                          | y                                             | y                                        | m                                 |
| y                                                          | y                                             | y                                        | y                                 |
| y                                                          | y                                             | y                                        | y                                 |
| y                                                          | y                                             | y                                        | y                                 |
| y                                                          | y                                             | y                                        | m                                 |
| Government website                                         | Government website                            | Government website                       | Government website                |

|                           |                            |                            |                           |
|---------------------------|----------------------------|----------------------------|---------------------------|
| U.S. Embassy in Angola. C | U.S. Embassy in Armenia. C | U.S. Embassy in Austria. C | UPDATE April 30 [Internet |
| usembassy.gov/covid-19-in | gov/u-s-citizen-services/  | usembassy.gov/covid-19-in  | https://lietuva.lt/wp-co  |
| m                         | m                          | m                          | y                         |
| m                         | m                          | m                          | y                         |
| y                         | y                          | y                          | y                         |
| y                         | y                          | y                          | y                         |
| y                         | y                          | y                          | y                         |
| m                         | m                          | m                          | y                         |
| Government website        | Government website         | Government website         | Government website        |

|                             |                           |                            |                          |
|-----------------------------|---------------------------|----------------------------|--------------------------|
| UPDATES ON CORONAVIRUS      | Vláda ČR. Informace ke kd | Vlada Republike Hrvatske   | YouTube. Health DG: 30 h |
| virus-disease-2019-covid-19 | /aktualne/ aktualni-infor | kako-umanjitirizik-od-zara | v.youtube.com/watch?v=>  |
| m                           | y                         | y                          | y                        |
| y                           | y                         | y                          | y                        |
| y                           | y                         | y                          | y                        |
| y                           | y                         | y                          | y                        |
| y                           | y                         | y                          | y                        |
| y                           | y                         | y                          | y                        |
| Government website          | Government website        | Government website         | Government website       |

|                                                                        |                                                                           |                                                                     |                                                                 |
|------------------------------------------------------------------------|---------------------------------------------------------------------------|---------------------------------------------------------------------|-----------------------------------------------------------------|
| Қазақстан Республикасы                                                 | /Covid-19 - Covid-19 algerie                                              | [Internet]. [cited 2020 Ma                                          | নীড় পাতা [Internet]. [cit                                      |
| <a href="http://gov.kz/memleket/entities">gov.kz/memleket/entities</a> | <a href="http://covid19.cipalgerie.com">http://covid19.cipalgerie.com</a> | <a href="https://corona.moh.gov.jp/">https://corona.moh.gov.jp/</a> | <a href="https://www.dghs.gov.bd/">https://www.dghs.gov.bd/</a> |
| y                                                                      | y                                                                         | y                                                                   | y                                                               |
| y                                                                      | y                                                                         | y                                                                   | m                                                               |
| y                                                                      | y                                                                         | y                                                                   | y                                                               |
| y                                                                      | y                                                                         | y                                                                   | y                                                               |
| y                                                                      | y                                                                         | y                                                                   | y                                                               |
| y                                                                      | y                                                                         | y                                                                   | m                                                               |
| Government website                                                     | Government website                                                        | Government website                                                  | Government website                                              |

|                            |                                 |                            |                                                                       |
|----------------------------|---------------------------------|----------------------------|-----------------------------------------------------------------------|
| Ghana. COVID-19 Update     | Ministry of Health, Labour      | Summary Statistics. Health | «كورونا».. بين الطواقم الطبية»                                        |
| www.ghanahealthservice.org | www.moh.gov.jp/english/database | www.health.gov.au/summary  | <a href="https://alqabas.com/article">https://alqabas.com/article</a> |
| y                          | y                               | y                          | m                                                                     |
| m                          | m                               | y                          | y                                                                     |
| y                          | y                               | y                          | y                                                                     |
| y                          | y                               | y                          | y                                                                     |
| y                          | y                               | y                          | y                                                                     |
| y                          | y                               | y                          | y                                                                     |
| Government website         | Government website              | Government website         | Media article                                                         |

|                           |                          |                           |                            |
|---------------------------|--------------------------|---------------------------|----------------------------|
| 112 more infected with co | 13% dos casos de covid-1 | 15 healthcare workers inf | 165 profissionais de saúde |
| 16/112-more-infected-wit  | 13-casos-covid19-profiss | 2020/03/576502/15-healt   | ofissionais-de-saude-infet |
| n                         | m                        | n                         | m                          |
| n                         | y                        | n                         | y                          |
| n                         | m                        | y                         | m                          |
| y                         | y                        | n                         | y                          |
| y                         | y                        | y                         | y                          |
| y                         | y                        | y                         | y                          |
| Media Article             | Media Article            | Media Article             | Media Article              |

|                            |                        |                          |                          |
|----------------------------|------------------------|--------------------------|--------------------------|
| 2 hospital workers die aft | 224 MoH medical worker | 24 of Malta's COVID-19 p | 28 healthcare workers co |
| 20/0415/1130776-eight-pn   | /2020/04/583446/224-mw | /24-of-maltas-covid-19-p | care-workers-contracted- |
| y                          | m                      | n                        | m                        |
| m                          | m                      | m                        | m                        |
| y                          | m                      | y                        | y                        |
| y                          | y                      | y                        | y                        |
| y                          | y                      | y                        | y                        |
| y                          | y                      | y                        | y                        |
| Media article              | Media Article          | Media Article            | Media Article            |

|                            |                          |                           |                          |
|----------------------------|--------------------------|---------------------------|--------------------------|
| 30.663 sanitarios se han c | 325 medical workers test | 47 South African healthca | 5 healthcare workers amc |
| has-de-30600-profesionalen | /2020/04/586972/325-n    | south-african-healthcare- | thcare-workers-among-48  |
| n                          | y                        | m                         | m                        |
| n                          | y                        | y                         | m                        |
| n                          | m                        | y                         | y                        |
| n                          | y                        | y                         | m                        |
| y                          | y                        | y                         | y                        |
| n                          | y                        | y                         | y                        |
| Media article              | Media Article            | Media Article             | Media Article            |



|                                          |                                           |                                                               |                                                               |
|------------------------------------------|-------------------------------------------|---------------------------------------------------------------|---------------------------------------------------------------|
| 548 doctors, nurses, para                | A medical worker infected                 | ABC News. Australian hea                                      | ABC News. Burkina Faso s                                      |
| <a href="#">amedics-infected-with-co</a> | <a href="#">l-worker-infected-with-co</a> | <a href="https://www.abc.net.au/">https://www.abc.net.au/</a> | <a href="https://abcnews.go.com/">https://abcnews.go.com/</a> |
| m                                        | n                                         | m                                                             | m                                                             |
| y                                        | m                                         | y                                                             | y                                                             |
| y                                        | m                                         | y                                                             | y                                                             |
| y                                        | y                                         | y                                                             | y                                                             |
| y                                        | y                                         | y                                                             | y                                                             |
| y                                        | y                                         | y                                                             | y                                                             |
| Media article                            | Media article                             | Media Article                                                 | Media article                                                 |

|                           |                           |                           |                           |
|---------------------------|---------------------------|---------------------------|---------------------------|
| ABC News. Fear meets for  | Afghanistan Anticipates M | Africanews. 41 African co | AICI SUNT ȘTIRILE. Two ou |
| eStory/fear-meets-fortitu | t.com/2020/04/02/coron    | com/2020/04/23/africa-s   | ronavirus-infected-patier |
| y                         | n                         | n                         | n                         |
| y                         | n                         | y                         | n                         |
| y                         | n                         | y                         | y                         |
| y                         | y                         | y                         | y                         |
| y                         | y                         | y                         | y                         |
| y                         | y                         | y                         | y                         |
| Media article             | Media article             | Media article             | Media article             |

|                          |                          |                                                                 |                              |
|--------------------------|--------------------------|-----------------------------------------------------------------|------------------------------|
| AKIpress News Agency. 12 | AKIpress News Agency. N  | Al Jazeera. Coronavirus co                                      | Al Jazeera. India hospital s |
| 22:120_medical_workers   | workers_contracting_coro | <a href="https://www.aljazeera.co">https://www.aljazeera.co</a> | dia-hospital-shuts-surge-co  |
| m                        | m                        | m                                                               | y                            |
| m                        | m                        | y                                                               | m                            |
| y                        | y                        | y                                                               | y                            |
| y                        | y                        | y                                                               | y                            |
| y                        | y                        | y                                                               | y                            |
| y                        | y                        | y                                                               | y                            |
| Media Article            | Media article            | Media Article                                                   | Media article                |

|                            |                            |                            |                            |
|----------------------------|----------------------------|----------------------------|----------------------------|
| Al Jazeera. Where the Ro   | Alerta Tolima. Noticias To | Algeria confirms 8th deat  | allAfrica.com. Liberia: He |
| omanian-state-struggled-ra | /en-colombia-hay-169-pr    | virus-outbreak/algeria-con | frica.com/stories/2020042  |
| n                          | n                          | m                          | m                          |
| y                          | y                          | y                          | m                          |
| m                          | y                          | y                          | m                          |
| y                          | y                          | y                          | y                          |
| y                          | y                          | y                          | y                          |
| y                          | y                          | y                          | y                          |
| Media article              | Media article              | Media Article              | Media article              |

|                             |                                                                                                                                                                                                                     |                           |                          |
|-----------------------------|---------------------------------------------------------------------------------------------------------------------------------------------------------------------------------------------------------------------|---------------------------|--------------------------|
| allAfrica.com. Liberia: Hea | Ambon hospital suspends                                                                                                                                                                                             | ANT1 News. ΠΟΕΔΗΝ: 12     | Apanews.net. Guinea's Cd |
| frica.com/stories/2020042   | <a href="https://www.thejakartapost.com/news/2020/04/22/ambon-hospital-suspends-operations-due-to-covid-19/">https://www.thejakartapost.com/news/2020/04/22/ambon-hospital-suspends-operations-due-to-covid-19/</a> | article/564636/poedin-125 | /news/guineas-covid-19-c |
| m                           | m                                                                                                                                                                                                                   | n                         | m                        |
| m                           | y                                                                                                                                                                                                                   | m                         | m                        |
| m                           | y                                                                                                                                                                                                                   | n                         | y                        |
| y                           | y                                                                                                                                                                                                                   | n                         | y                        |
| y                           | y                                                                                                                                                                                                                   | y                         | y                        |
| y                           | y                                                                                                                                                                                                                   | y                         | y                        |
| Media article               | Media Article                                                                                                                                                                                                       | Media Article             | Media article            |

|                          |                            |                                                                       |                             |
|--------------------------|----------------------------|-----------------------------------------------------------------------|-----------------------------|
| APO Group - Africa Newsr | Asia-Pacific health worker | At least 8 health workers                                             | Australia's coronavirus vid |
| ronavirus-cameroon-mas   | c/asia-pacific-health-work | <a href="https://colombiareports.com">https://colombiareports.com</a> | ustralia-coronavirus-victir |
| n                        | m                          | m                                                                     | Y                           |
| n                        | y                          | y                                                                     | m                           |
| m                        | y                          | y                                                                     | Y                           |
| y                        | y                          | y                                                                     | Y                           |
| y                        | y                          | y                                                                     | Y                           |
| y                        | y                          | y                                                                     | Y                           |
| Media article            | Media Article              | Media article                                                         | Media Article               |

|                         |                            |                         |                                                               |
|-------------------------|----------------------------|-------------------------|---------------------------------------------------------------|
| Bahamas Local News. Bah | Baltic News Network. At I  | Bangladesh mourns death | Bangladesh: 11% COVID-1                                       |
| s%20said%2060%20ventil  | hcare-workers-in-latvia-cc | angladesh-mourns-death- | <a href="https://www.aa.com.tr/e">https://www.aa.com.tr/e</a> |
| y                       | m                          | m                       | m                                                             |
| y                       | m                          | y                       | y                                                             |
| y                       | y                          | y                       | y                                                             |
| y                       | y                          | y                       | y                                                             |
| y                       | y                          | y                       | y                                                             |
| y                       | y                          | y                       | y                                                             |
| Media Article           | Media Article              | Media Article           | Media Article                                                 |

|                                  |                          |                          |                           |
|----------------------------------|--------------------------|--------------------------|---------------------------|
| BBC News <b>بمات أو المطهرات</b> | BBC News. Coronavirus ki | BBC News. Coronavirus: A | Bertone MP, Lurton G, M   |
| www.bbc.com/arabic/media         | uk/news/world-africa-523 | bbc.co.uk/news/world-af  | rup.com/heapol/article/31 |
| Y                                | n                        | n                        | y                         |
| Y                                | y                        | n                        | y                         |
| Y                                | n                        | y                        | y                         |
| Y                                | n                        | y                        | y                         |
| Y                                | m                        | y                        | y                         |
| Y                                | n                        | y                        | y                         |
| Media Article                    | Media Article            | Media article            | Media article             |



|                          |                           |                           |                          |
|--------------------------|---------------------------|---------------------------|--------------------------|
| BHTV. Hay 237 doctores i | Bloomberg. Africa Virus N | Bloomberg. Hospitals Bec  | bne IntelliNews. Hungary |
| tados-con-coronavirus-en | 1-20/aid-worker-dies-of-c | 20-04-01/hospitals-becoms | -for-the-worst-and-empti |
| m                        | m                         | n                         | m                        |
| n                        | y                         | n                         | m                        |
| m                        | n                         | y                         | m                        |
| y                        | m                         | y                         | y                        |
| y                        | y                         | y                         | y                        |
| y                        | y                         | y                         | y                        |
| Media article            | Media Article             | Media article             | Media article            |

| Buenos Aires Times. 14%     | Buenos Aires Times. Natic                | Business Review. BR Daily   | Cabo Verde: Country reco                                    |
|-----------------------------|------------------------------------------|-----------------------------|-------------------------------------------------------------|
| ovid-19-infections-in-argen | <a href="#">tionwide-lockdown-limite</a> | althcare/staysafe-br-daily- | <a href="https://www.macaubusin">https://www.macaubusin</a> |
| y                           | m                                        | n                           | m                                                           |
| y                           | y                                        | y                           | y                                                           |
| y                           | y                                        | m                           | y                                                           |
| y                           | y                                        | y                           | y                                                           |
| y                           | y                                        | y                           | y                                                           |
| y                           | y                                        | y                           | y                                                           |
| Media Article               | Media article                            | Media Article               | Media article                                               |

|                         |                          |                          |                                                               |
|-------------------------|--------------------------|--------------------------|---------------------------------------------------------------|
| Cambodian healthcare wi | Cameroon closes schools, | Cameroun-Coronavirus : u | CBC News. 'She's a hero':                                     |
| asiaglobe.com/cambodian | eroon-closes-schools-bor | om/cameroun-un-medeci    | <a href="https://www.cbc.ca/news">https://www.cbc.ca/news</a> |
| y                       | n                        | n                        | y                                                             |
| m                       | n                        | n                        | y                                                             |
| n                       | m                        | m                        | y                                                             |
| y                       | y                        | y                        | y                                                             |
| y                       | y                        | y                        | y                                                             |
| y                       | y                        | y                        | y                                                             |
| Media Article           | Media Article            | Media Article            | Media article                                                 |

|                                                                             |                                                                                                                                                         |                                                                    |                                                       |
|-----------------------------------------------------------------------------|---------------------------------------------------------------------------------------------------------------------------------------------------------|--------------------------------------------------------------------|-------------------------------------------------------|
| CDN. Revelan hay tres médicos dominicanos que se infectaron con el COVID-19 | CGTN Africa. Kenya reports first COVID-19 case                                                                                                          | China.org.cn. 3 doctors die from COVID-19 in Wuhan                 | China.org.cn. COVID-19 cases in Wuhan                 |
| in-hay-tres-medicos-dominicanos-que-se-infectaron-con-el-covid-19           | <a href="https://africa.cgtn.com/2020-03-18/kenya-reports-first-covid-19-case">https://africa.cgtn.com/2020-03-18/kenya-reports-first-covid-19-case</a> | World/Off_the_Wire/2020-03-18/3-doctors-die-from-covid-19-in-wuhan | World/Off_the_Wire/2020-03-18/covid-19-cases-in-wuhan |
| n                                                                           | m                                                                                                                                                       | n                                                                  | n                                                     |
| y                                                                           | m                                                                                                                                                       | n                                                                  | n                                                     |
| y                                                                           | y                                                                                                                                                       | y                                                                  | n                                                     |
| y                                                                           | y                                                                                                                                                       | y                                                                  | y                                                     |
| y                                                                           | y                                                                                                                                                       | y                                                                  | y                                                     |
| y                                                                           | y                                                                                                                                                       | y                                                                  | y                                                     |
| Media article                                                               | Media Article                                                                                                                                           | Media Article                                                      | Media article                                         |

|                            |                                                               |                          |                           |
|----------------------------|---------------------------------------------------------------|--------------------------|---------------------------|
| Chinadaily.com.cn. Latin A | Clarín. Coronavirus en Arg                                    | CNBC Africa. Coronavirus | CNN. Enfermeras dominic   |
| cn/a/202004/16/WS5e97f     | <a href="https://www.clarin.com/">https://www.clarin.com/</a> | uth-sudan-who-prepositio | 543-infectados-por-covid- |
| n                          | m                                                             | m                        | m                         |
| n                          | y                                                             | y                        | y                         |
| y                          | y                                                             | y                        | y                         |
| y                          | y                                                             | y                        | y                         |
| y                          | y                                                             | y                        | y                         |
| y                          | y                                                             | m                        | y                         |
| Media article              | Media article                                                 | Media article            | Media article             |

| Confirmed Covid-19 cases | Coronavirus (COVID-19) in | Coronavirus a San Marino | Coronavirus au Togo : 34  |
|--------------------------|---------------------------|--------------------------|---------------------------|
| 264204/confirmed-covid-  | tours.com/coronavirus-co- | marino-scoperto-focolai  | coronavirus-togo-34-cas-d |
| m                        | n                         | n                        | m                         |
| m                        | n                         | y                        | y                         |
| n                        | n                         | y                        | m                         |
| y                        | y                         | y                        | y                         |
| y                        | y                         | y                        | y                         |
| n                        | y                         | y                        | m                         |
| Media article            | Media Article             | Media Article            | Media article             |



|                             |                             |                                                               |                           |
|-----------------------------|-----------------------------|---------------------------------------------------------------|---------------------------|
| Coronavirus testing rate in | Coronavirus : Parmi les vic | Coronavirus: Four health                                      | Coronavirus: Over 40 Nige |
| er/coronavirus-testing-rat  | ronavirus-parmi-victimes    | <a href="https://www.panapress.c">https://www.panapress.c</a> | ronavirus-over-40-nige    |
| n                           | n                           | m                                                             | n                         |
| n                           | m                           | y                                                             | m                         |
| m                           | m                           | y                                                             | m                         |
| y                           | y                           | y                                                             | m                         |
| y                           | y                           | y                                                             | m                         |
| y                           | y                           | y                                                             | n                         |
| Media Article               | Media article               | Media Article                                                 | Media article             |



| Coronavirus: Tributes paid   | Covid-19 : 3 agents de net | Covid-19 cases and death | COVID-19 claims first doc |
|------------------------------|----------------------------|--------------------------|---------------------------|
| s-tributes-paid-to-kilkennys | ys-de-nettoisement-et-une- | &id=53781&SEO=covid-1    | a426731/COVID-19-claims   |
| y                            | y                          | n                        | m                         |
| y                            | m                          | n                        | y                         |
| m                            | y                          | n                        | y                         |
| y                            | y                          | y                        | y                         |
| y                            | y                          | y                        | y                         |
| y                            | y                          | n                        | y                         |
| Media article                | Media article              | Media article            | Media article             |

|                                                                             |                                                                            |                          |                             |
|-----------------------------------------------------------------------------|----------------------------------------------------------------------------|--------------------------|-----------------------------|
| COVID-19 Georgia Live Blog                                                  | Covid-19 in Bulgaria: Day                                                  | COVID-19 UPDATES: Bosnia | Covid-19. Portugal registra |
| <a href="https://civil.ge/archives/3424">https://civil.ge/archives/3424</a> | <a href="https://www.bpost/101272049/covid-19">post/101272049/covid-19</a> | D-19-UPDATES-More-than   | 9-portugal-regista-1435-pr  |
| m                                                                           | m                                                                          | m                        | n                           |
| m                                                                           | m                                                                          | m                        | y                           |
| y                                                                           | n                                                                          | n                        | m                           |
| y                                                                           | y                                                                          | y                        | y                           |
| y                                                                           | y                                                                          | y                        | y                           |
| y                                                                           | n                                                                          | m                        | y                           |
| Media article                                                               | Media article                                                              | Media article            | Media article               |

|                                          |                                           |                                           |                                          |
|------------------------------------------|-------------------------------------------|-------------------------------------------|------------------------------------------|
| Covid-19: Há 764 profissid               | COVID-19: Updates From                    | Cyprus Mail. Hospital clos                | Daily Mail Pakistan. 136 T               |
| <a href="#">20-03-28-Covid-19-Ha-764</a> | <a href="#">om/raw-unfiltered/covid-1</a> | <a href="#">l-close-to-shutdown-after</a> | <a href="#">4/29/136-tajik-medical-w</a> |
| n                                        | m                                         | y                                         | n                                        |
| y                                        | y                                         | m                                         | n                                        |
| m                                        | y                                         | n                                         | n                                        |
| y                                        | y                                         | m                                         | y                                        |
| y                                        | y                                         | y                                         | y                                        |
| y                                        | y                                         | m                                         | n                                        |
| Media article                            | Media article                             | Media article                             | Media article                            |

|                         |                            |                            |                            |
|-------------------------|----------------------------|----------------------------|----------------------------|
| Deaths from coronavirus | Diez - Diario Deportivo. C | Diez - Diario Deportivo. M | Diez - Diario Deportivo. M |
| c/deaths-from-coronavir | muere-doctora-honduras     | cos-exigen-proteccion-efe  | muere-enfermera-coronavir  |
| m                       | n                          | m                          | m                          |
| y                       | n                          | m                          | m                          |
| y                       | y                          | y                          | y                          |
| y                       | y                          | y                          | y                          |
| y                       | y                          | y                          | y                          |
| y                       | y                          | y                          | y                          |
| Media Article           | Media article              | Media article              | Media article              |

|                            |                          |                                                                   |                           |
|----------------------------|--------------------------|-------------------------------------------------------------------|---------------------------|
| Diez - Diario Deportivo. U | DN. 140 mortos e 6408 ca | Doctors, nurses face salar                                        | Dozens of Iranian Doctors |
| 0-441/medico-enfermera     | asos-de-covid-19-em-port | <a href="https://thefinancialexpre">https://thefinancialexpre</a> | /31/dozens-of-iranian-doo |
| y                          | m                        | m                                                                 | n                         |
| y                          | y                        | y                                                                 | n                         |
| y                          | m                        | y                                                                 | m                         |
| y                          | y                        | y                                                                 | m                         |
| y                          | y                        | y                                                                 | m                         |
| y                          | y                        | y                                                                 | y                         |
| Media article              | Media Article            | Media Article                                                     | Media article             |

|                          |                                                                  |                                                                     |                         |
|--------------------------|------------------------------------------------------------------|---------------------------------------------------------------------|-------------------------|
| DTNext.in. Over 1,000 me | Duvar English. 7,428 heal                                        | Eighth doctor dies from c                                           | ekathimerini.com. Remot |
| 4321/1225854/Over-1000   | <a href="https://2020/04/29/7428-hea">us/2020/04/29/7428-hea</a> | <a href="http://english.ahram.org.e">http://english.ahram.org.e</a> | /ekathimerini/news/rem  |
| y                        | m                                                                | m                                                                   | m                       |
| m                        | y                                                                | y                                                                   | n                       |
| m                        | m                                                                | y                                                                   | n                       |
| n                        | y                                                                | y                                                                   | y                       |
| y                        | y                                                                | y                                                                   | y                       |
| y                        | m                                                                | y                                                                   | y                       |
| Media article            | Media article                                                    | Media article                                                       | Media article           |

|                           |                                                                   |                                |                           |
|---------------------------|-------------------------------------------------------------------|--------------------------------|---------------------------|
| El Comercio. Alexandra O  | Epidemic Diseases - COVID                                         | ERR. 41 employees of Kur       | ERR. 89 health care worke |
| alidad/informe-coronaviru | <a href="https://ais.paho.org/phis">https://ais.paho.org/phis</a> | employees-of-kuressaare-hospit | lth-care-workers-have-rec |
| m                         | m                                                                 | m                              | y                         |
| m                         | m                                                                 | m                              | m                         |
| m                         | y                                                                 | y                              | y                         |
| y                         | y                                                                 | y                              | y                         |
| y                         | y                                                                 | y                              | y                         |
| m                         | y                                                                 | y                              | y                         |
| Media Article             | Media Article                                                     | Media Article                  | Media Article             |

|                              |                             |                           |                           |
|------------------------------|-----------------------------|---------------------------|---------------------------|
| ERR. Eestis on koroonaviirum | Eswatini nurses to sue gove | eSwatini records 2 new C  | Eswatini, Zambia record n |
| 18/eestis-on-koroonaviirum   | /news/africa/eswatini-n     | -records-2-new-covid-19-a | /eswatini-zambia-record-  |
| y                            | m                           | m                         | m                         |
| m                            | m                           | m                         | m                         |
| y                            | n                           | n                         | n                         |
| y                            | y                           | y                         | y                         |
| y                            | y                           | y                         | y                         |
| y                            | m                           | y                         | y                         |
| Media Article                | Media article               | Media article             | Media article             |



|                                                                     |                          |                            |                           |
|---------------------------------------------------------------------|--------------------------|----------------------------|---------------------------|
| Eurasianet. Dashboard: Co                                           | European Observatory on  | EyeWitness News. First ph  | Financial Mirror. COVID-1 |
| <a href="https://eurasianet.org/das">https://eurasianet.org/das</a> | /partners/observatory/pe | s-in-covid-19-fight-vetera | 0/04/10/covid-19-healthc  |
| m                                                                   | y                        | m                          | m                         |
| y                                                                   | y                        | m                          | m                         |
| y                                                                   | y                        | n                          | n                         |
| y                                                                   | y                        | y                          | m                         |
| y                                                                   | y                        | y                          | y                         |
| y                                                                   | y                        | y                          | m                         |
| Media article                                                       | Media article            | Media article              | Media article             |

|                            |                            |                             |                            |
|----------------------------|----------------------------|-----------------------------|----------------------------|
| Financial Mirror. COVID-19 | For how long can India's H | Forssan Lehti. Uuden laste  | FrontPageAfrica. Liberia D |
| /04/covid-19-one-in-four   | ong-can-indias-healthcare  | insiirto-osaston-hoitajalla | declares-a-state-of-health |
| m                          | m                          | m                           | y                          |
| m                          | m                          | m                           | y                          |
| n                          | y                          | y                           | y                          |
| m                          | m                          | y                           | y                          |
| y                          | y                          | y                           | y                          |
| m                          | y                          | y                           | y                          |
| Media article              | Media article              | Media Article               | Media article              |

|                             |                          |                           |                                                                 |
|-----------------------------|--------------------------|---------------------------|-----------------------------------------------------------------|
| Fundraiser by Pharm Ike C   | G1. Casos de coronavirus | Gabon Media Time. Coron   | Globalnews.ca. Quebec sc                                        |
| lion-masks-for-nigeria-head | 04/17/casos-de-coronavir | ve.com/coronavirus-premie | <a href="https://globalnews.ca/ne">https://globalnews.ca/ne</a> |
| m                           | y                        | m                         | m                                                               |
| n                           | y                        | n                         | y                                                               |
| n                           | m                        | y                         | y                                                               |
| n                           | y                        | y                         | y                                                               |
| y                           | y                        | y                         | y                                                               |
| y                           | y                        | y                         | y                                                               |
| Media article               | Media Article            | Media Article             | Media article                                                   |

|                                                                   |                           |                            |                                                                                  |
|-------------------------------------------------------------------|---------------------------|----------------------------|----------------------------------------------------------------------------------|
| Gobierno de El Salvador. (                                        | Health Ministry has 3,300 | Health Service Journal. Ex | Health workers with COVI                                                         |
| <a href="https://cov.salud.gob.sv/">https://cov.salud.gob.sv/</a> | stry-has-3-300-mechanical | deaths-of-nhs-staff-from-d | <a href="https://www.bmj.com/news/2020/5/8/health-w">/news/2020/5/8/health-w</a> |
| y                                                                 | y                         | y                          | y                                                                                |
| y                                                                 | n                         | m                          | y                                                                                |
| y                                                                 | y                         | y                          | m                                                                                |
| y                                                                 | y                         | y                          | y                                                                                |
| y                                                                 | y                         | y                          | y                                                                                |
| y                                                                 | y                         | y                          | y                                                                                |
| Media article                                                     | Media article             | Media article              | Media article                                                                    |

| Health. KUNA : Algeria co                                     | HealthManagement.org.      | Hospitals of Kyrgyzstan ha | Hoy Digital. Colegio Médi |
|---------------------------------------------------------------|----------------------------|----------------------------|---------------------------|
| <a href="https://www.kuna.net.kw">https://www.kuna.net.kw</a> | ent.org/c/icu/issuearticle | ospitals_of_Kyrgyzstan_h   | al-ministro-muestra-evid  |
| m                                                             | y                          | y                          | n                         |
| y                                                             | y                          | y                          | y                         |
| y                                                             | y                          | y                          | y                         |
| y                                                             | y                          | y                          | y                         |
| y                                                             | y                          | y                          | y                         |
| y                                                             | y                          | y                          | y                         |
| Media Article                                                 | Media article              | Media article              | Media Article             |

|                          |                                                                 |                           |                                                             |
|--------------------------|-----------------------------------------------------------------|---------------------------|-------------------------------------------------------------|
| Human Rights Watch. Leb  | Hungary Today. Coronavi                                         | Hungary Today. Total of 8 | I nomi di medici e sanitari                                 |
| 20/03/24/lebanon-covid-1 | <a href="https://hungarytoday.hu/">https://hungarytoday.hu/</a> | 85-medical-workers-are-in | <a href="https://www.varesenews">https://www.varesenews</a> |
| y                        | m                                                               | m                         | m                                                           |
| y                        | m                                                               | m                         | y                                                           |
| n                        | y                                                               | m                         | y                                                           |
| m                        | y                                                               | y                         | y                                                           |
| y                        | y                                                               | y                         | y                                                           |
| y                        | y                                                               | y                         | y                                                           |
| Media article            | Media article                                                   | Media article             | Media article                                               |

|                            |                          |                             |                             |
|----------------------------|--------------------------|-----------------------------|-----------------------------|
| Iceland Monitor. Five Crit | In Memoriam: Healthcare  | India Loses First Frontline | Indiatimes. Hello, we are   |
| s/2020/03/09/five_critica  | cape.com/viewarticle/927 | e-warrior-as-indore-doctors | ors-nurses-testing-positive |
| m                          | y                        | n                           | n                           |
| m                          | m                        | n                           | n                           |
| m                          | n                        | y                           | n                           |
| y                          | m                        | y                           | y                           |
| y                          | m                        | y                           | y                           |
| y                          | y                        | y                           | y                           |
| Media article              | Media article            | Media article               | Media article               |

|                                                                                                                                                                                                       |                                                                                                                                                   |                                                                                                                               |                                                                                                                           |
|-------------------------------------------------------------------------------------------------------------------------------------------------------------------------------------------------------|---------------------------------------------------------------------------------------------------------------------------------------------------|-------------------------------------------------------------------------------------------------------------------------------|---------------------------------------------------------------------------------------------------------------------------|
| Indonesia: 55 Medical Workers and Positive Case with COVID-19                                                                                                                                         | Inicio. Voz de Guanacaste: COVID-19                                                                                                               | IPN. COVID-19 claims two deaths                                                                                               | Iran News Wire on Twitter                                                                                                 |
| <a href="https://www.benarnews.com/news/indonesia-55-medical-workers-and-positive-case-with-covid-19">https://www.benarnews.com/news/indonesia-55-medical-workers-and-positive-case-with-covid-19</a> | <a href="https://www.vozdeguanacaste.com/inicio-voz-de-guanacaste-covid-19">https://www.vozdeguanacaste.com/inicio-voz-de-guanacaste-covid-19</a> | <a href="https://www.ipn.md/en/om/ipn-covid-19-claims-two-deaths">https://www.ipn.md/en/om/ipn-covid-19-claims-two-deaths</a> | <a href="https://twitter.com/IranNW/status/1251934444444444444">https://twitter.com/IranNW/status/1251934444444444444</a> |
| m                                                                                                                                                                                                     | n                                                                                                                                                 | m                                                                                                                             | y                                                                                                                         |
| y                                                                                                                                                                                                     | n                                                                                                                                                 | y                                                                                                                             | m                                                                                                                         |
| y                                                                                                                                                                                                     | y                                                                                                                                                 | y                                                                                                                             | m                                                                                                                         |
| y                                                                                                                                                                                                     | y                                                                                                                                                 | y                                                                                                                             | y                                                                                                                         |
| y                                                                                                                                                                                                     | y                                                                                                                                                 | y                                                                                                                             | y                                                                                                                         |
| y                                                                                                                                                                                                     | y                                                                                                                                                 | y                                                                                                                             | y                                                                                                                         |
| Media Article                                                                                                                                                                                         | Media article                                                                                                                                     | Media article                                                                                                                 | Media Article                                                                                                             |



|                             |                              |                            |                            |
|-----------------------------|------------------------------|----------------------------|----------------------------|
| Is Algeria Becoming Africa  | Israeli coronavirus cases j  | Jakarta Globe. Six Indones | Japan reports first corona |
| is-algeria-on-its-way-to-be | is-cases-in-israel-climbs-to | x-indonesian-doctors-die-  | n-reports-first-coronaviru |
| n                           | y                            | y                          | m                          |
| m                           | y                            | y                          | y                          |
| n                           | m                            | m                          | y                          |
| m                           | y                            | y                          | y                          |
| y                           | y                            | y                          | y                          |
| y                           | y                            | y                          | y                          |
| Media article               | Media article                | Media article              | Media article              |

|                            |                          |                            |                                                             |
|----------------------------|--------------------------|----------------------------|-------------------------------------------------------------|
| Kaieteur News. Former pa   | Kalamata Koronaios: A do | Kazakh Hospital A Corona   | Khmer Times. COVID-19: f                                    |
| ency-medical-technician-su | /17/ellada/kalamata-kor  | ital-coronavirus-hotspot-s | <a href="https://www.khmertimes">https://www.khmertimes</a> |
| m                          | m                        | m                          | m                                                           |
| m                          | n                        | m                          | y                                                           |
| y                          | n                        | y                          | y                                                           |
| y                          | y                        | y                          | y                                                           |
| y                          | y                        | y                          | y                                                           |
| y                          | y                        | y                          | y                                                           |
| Media article              | Media article            | Media article              | Media Article                                               |

|                               |                           |                                                                         |                           |
|-------------------------------|---------------------------|-------------------------------------------------------------------------|---------------------------|
| Korle Bu doctor and nurse     | Kuwait 2020 Health Infras | La defunció d'una dona de                                               | Lack of Covid-19 treatmen |
| /04/korle-bu-doctor-and-nurse | www.kuwaitbuildingshow.co | <a href="https://www.diariandorra.com">https://www.diariandorra.com</a> | /lack-covid-19-treatmen   |
| m                             | m                         | m                                                                       | y                         |
| y                             | m                         | y                                                                       | y                         |
| y                             | y                         | y                                                                       | y                         |
| Y                             | y                         | y                                                                       | y                         |
| y                             | y                         | y                                                                       | y                         |
| y                             | y                         | y                                                                       | y                         |
| Media article                 | Media article             | Media article                                                           | Media article             |

|                                                                 |                                                                   |                           |                           |
|-----------------------------------------------------------------|-------------------------------------------------------------------|---------------------------|---------------------------|
| LB.ua. Законопроект 'Слу                                        | Le Parisien. HOMMAGE. D                                           | Lebanon's coronavirus res | Lesotho declares national |
| <a href="https://lb.ua/news/2020/">https://lb.ua/news/2020/</a> | <a href="http://www.leparisien.fr/">http://www.leparisien.fr/</a> | 020/04/lebanon-coronav    | sotho-declares-national-e |
| m                                                               | m                                                                 | y                         | n                         |
| y                                                               | y                                                                 | y                         | y                         |
| y                                                               | y                                                                 | n                         | n                         |
| y                                                               | y                                                                 | m                         | y                         |
| y                                                               | y                                                                 | y                         | y                         |
| y                                                               | y                                                                 | y                         | m                         |
| Media Article                                                   | Media article                                                     | Media article             | Media article             |

|                          |                                                                   |                           |                           |
|--------------------------|-------------------------------------------------------------------|---------------------------|---------------------------|
| Liberia COVID-19 Cases N | Loop News. Five Jamaican                                          | Los Angeles Times. As cor | Los Angeles Times. Health |
| iberia-covid-19-cases-ne | <a href="https://www.loopjamaica7/">https://www.loopjamaica7/</a> | as-coronavirus-spreads-   | 02-25/doctors-fighting-co |
| m                        | m                                                                 | m                         | y                         |
| m                        | y                                                                 | m                         | n                         |
| y                        | y                                                                 | m                         | y                         |
| y                        | y                                                                 | y                         | y                         |
| y                        | y                                                                 | y                         | y                         |
| y                        | y                                                                 | y                         | y                         |
| Media article            | Media article                                                     | Media Article             | Media article             |

|                           |                                                                                                                   |                          |                           |
|---------------------------|-------------------------------------------------------------------------------------------------------------------|--------------------------|---------------------------|
| Los Angeles Times. Mexic  | LRT. Coronavirus: 10 new                                                                                          | LRT. Coronavirus: 51 med | LRT. Coronavirus: 771 cor |
| 0-04-10/as-doctors-beg-fc | <a href="https://www.lrt.lt/en/news/112/coronavirus-51-med">https://www.lrt.lt/en/news/112/coronavirus-51-med</a> | 112/coronavirus-51-med   | ronavirus-771-confirmed-  |
| m                         | m                                                                                                                 | y                        | m                         |
| m                         | y                                                                                                                 | y                        | n                         |
| m                         | y                                                                                                                 | m                        | n                         |
| y                         | y                                                                                                                 | y                        | m                         |
| y                         | y                                                                                                                 | y                        | y                         |
| y                         | y                                                                                                                 | y                        | m                         |
| Media article             | Media article                                                                                                     | Media Article            | Media Article             |

|                                                                     |                                                                     |                           |                           |
|---------------------------------------------------------------------|---------------------------------------------------------------------|---------------------------|---------------------------|
| LRT. Coronavirus: Lithuan                                           | LRT. Coronavirus: Lithuan                                           | Magnetic Media. Two Mo    | MAY BLOG: Coronavirus if  |
| <a href="https://www.lrt.lt/en/news">https://www.lrt.lt/en/news</a> | <a href="https://www.lrt.lt/en/news">https://www.lrt.lt/en/news</a> | more-covid-19-deaths-in-t | world.com/life/blog-coron |
| m                                                                   | m                                                                   | y                         | n                         |
| y                                                                   | y                                                                   | n                         | m                         |
| y                                                                   | y                                                                   | y                         | y                         |
| y                                                                   | y                                                                   | y                         | y                         |
| y                                                                   | y                                                                   | y                         | y                         |
| y                                                                   | y                                                                   | y                         | y                         |
| Media article                                                       | Media article                                                       | Media article             | Media Article             |

|                                                               |                           |                           |                           |
|---------------------------------------------------------------|---------------------------|---------------------------|---------------------------|
| Mediuutiset. Mieslääkäriä                                     | MedPage Today. Honorin    | MENAFN.COM. Health Mi     | Metro Libre. Los héroes q |
| <a href="https://www.mediuutiset">https://www.mediuutiset</a> | getoday.com/infectiousdis | Ministry-1386-Ukrainian-h | 67-los-h%C3%A9roes-que-   |
| m                                                             | y                         | y                         | n                         |
| y                                                             | y                         | y                         | n                         |
| y                                                             | y                         | y                         | y                         |
| y                                                             | y                         | y                         | m                         |
| y                                                             | y                         | y                         | m                         |
| y                                                             | y                         | y                         | n                         |
| Media article                                                 | Media article             | Media Article             | Media article             |



|                                                                                                                                                                                                         |                                                                                                                           |                                                                                                                                            |                                                                                                                                                                                                |
|---------------------------------------------------------------------------------------------------------------------------------------------------------------------------------------------------------|---------------------------------------------------------------------------------------------------------------------------|--------------------------------------------------------------------------------------------------------------------------------------------|------------------------------------------------------------------------------------------------------------------------------------------------------------------------------------------------|
| Reuters. Over 90,000 health workers in Egypt die from COVID-19. <a href="#">https://www.reuters.com/article/health-workers-egypt/over-90000-health-workers-in-egypt-die-from-covid-19-idUSKCN230104</a> | Wikipedia. Impact of the COVID-19 pandemic. <a href="#">https://en.wikipedia.org/wiki/Impact_of_the_COVID-19_pandemic</a> | World Economic Forum. H19: The World Economic Outlook. <a href="#">https://www.weforum.org/publications/h19-the-world-economic-outlook</a> | Middle East Monitor. WHO: 100 of Egypt's COVID-19 deaths were health workers. <a href="#">https://www.middleeastmonitor.com/20200414-who-100-of-egypts-covid-19-deaths-were-health-workers</a> |
| m                                                                                                                                                                                                       | m                                                                                                                         | m                                                                                                                                          | m                                                                                                                                                                                              |
| m                                                                                                                                                                                                       | m                                                                                                                         | m                                                                                                                                          | m                                                                                                                                                                                              |
| m                                                                                                                                                                                                       | m                                                                                                                         | m                                                                                                                                          | m                                                                                                                                                                                              |
| y                                                                                                                                                                                                       | y                                                                                                                         | y                                                                                                                                          | y                                                                                                                                                                                              |
| m                                                                                                                                                                                                       | m                                                                                                                         | m                                                                                                                                          | m                                                                                                                                                                                              |
| Media article                                                                                                                                                                                           | Media article                                                                                                             | Media article                                                                                                                              | Media article                                                                                                                                                                                  |

|                                  |                                                                                                                                                           |                              |                             |
|----------------------------------|-----------------------------------------------------------------------------------------------------------------------------------------------------------|------------------------------|-----------------------------|
| Migration of health workers from | Morocco Mourns 3 Doctors                                                                                                                                  | MTVuutiset.fi. Savon Sanasto | Neurocirujanos del Hospital |
| 0health%20workers%20from         | <a href="https://www.moroccoworldnews.com/2020/03/03/morocco-mourns-3-doctors/">https://www.moroccoworldnews.com/2020/03/03/morocco-mourns-3-doctors/</a> | ajoukkueen-pitkaaikainen     | neurocirujanos-del-hospital |
| y                                | m                                                                                                                                                         | m                            | m                           |
| m                                | y                                                                                                                                                         | m                            | y                           |
| y                                | y                                                                                                                                                         | y                            | y                           |
| y                                | y                                                                                                                                                         | y                            | y                           |
| y                                | y                                                                                                                                                         | y                            | y                           |
| y                                | y                                                                                                                                                         | y                            | y                           |
| Media article                    | Media article                                                                                                                                             | Media article                | Media article               |

|                               |                              |                                                                 |                                        |
|-------------------------------|------------------------------|-----------------------------------------------------------------|----------------------------------------|
| New 372 cases of coronavirus  | NHK WORLD-JAPAN. Coronavirus | Nigeria: 113 healthcare workers                                 | NMA mourns as medical director         |
| /new-372-cases-of-coronavirus | .or.jp/nhkworld/en/news      | <a href="https://www.aa.com.tr/en">https://www.aa.com.tr/en</a> | <a href="#">/nma-mourns-as-medical</a> |
| m                             | m                            | m                                                               | n                                      |
| y                             | y                            | y                                                               | y                                      |
| m                             | m                            | y                                                               | n                                      |
| y                             | y                            | y                                                               | n                                      |
| y                             | y                            | y                                                               | m                                      |
| y                             | y                            | y                                                               | n                                      |
| Media article                 | Media Article                | Media Article                                                   | Media article                          |

|                           |                             |                                                                     |                                                               |
|---------------------------|-----------------------------|---------------------------------------------------------------------|---------------------------------------------------------------|
| NODAL. Ecuador: 80 profes | Noticias de El Salvador. Pe | Number of corona-hit car                                            | Number of key workers g                                       |
| n-ecuador-guayas-registra | navirus-personal-medico-    | <a href="https://thefinancialexpres">https://thefinancialexpres</a> | <a href="https://www.theguardian">https://www.theguardian</a> |
| m                         | m                           | m                                                                   | m                                                             |
| m                         | m                           | y                                                                   | y                                                             |
| y                         | m                           | y                                                                   | y                                                             |
| y                         | y                           | y                                                                   | y                                                             |
| y                         | y                           | y                                                                   | y                                                             |
| y                         | y                           | y                                                                   | y                                                             |
| Media Article             | Media article               | Media Article                                                       | Media Article                                                 |

|                                |                             |                             |                                        |
|--------------------------------|-----------------------------|-----------------------------|----------------------------------------|
| Number of new coronavirus      | Number of SA health workers | NZ Herald. Covid 19 coron   | Only 112 ICU beds for coron            |
| 1830/number-of-new-coronavirus | number-of-sa-health-workers | nz/nz/news/article.cfm?cid= | 4016/only-112-icu-beds-for-coronavirus |
| m                              | y                           | n                           | n                                      |
| y                              | y                           | m                           | m                                      |
| m                              | m                           | y                           | y                                      |
| y                              | y                           | y                           | m                                      |
| y                              | y                           | y                           | y                                      |
| y                              | m                           | y                           | m                                      |
| Media article                  | Media article               | Media article               | Media article                          |

| Over 1,300 health profess                                       | Over 100 Doctors and Nur   | Over 100 health care wor | Over 500 S. African health                                    |
|-----------------------------------------------------------------|----------------------------|--------------------------|---------------------------------------------------------------|
| <a href="http://www.xinhuanet.com">http://www.xinhuanet.com</a> | ths-infections-doctors-nur | health_care_workers_in   | <a href="https://www.aa.com.tr/e">https://www.aa.com.tr/e</a> |
| n                                                               | m                          | m                        | m                                                             |
| y                                                               | m                          | m                        | y                                                             |
| y                                                               | m                          | y                        | y                                                             |
| y                                                               | y                          | y                        | y                                                             |
| y                                                               | y                          | y                        | y                                                             |
| y                                                               | y                          | y                        | y                                                             |
| Media article                                                   | Media article              | Media article            | Media Article                                                 |

|                            |                            |                          |                           |
|----------------------------|----------------------------|--------------------------|---------------------------|
| Pakistan Post. Fighting on | Pakistan Struggles to Figh | Panamá suma 146 muerte   | Pandemic takes toll on he |
| -line-at-least-253-healthc | m/2020/04/pakistan-struga  | a-146-muertes-por-el-cov | /pandemic-takes-toll-on-h |
| n                          | n                          | m                        | m                         |
| y                          | n                          | m                        | y                         |
| m                          | y                          | y                        | y                         |
| y                          | y                          | n                        | y                         |
| y                          | y                          | y                        | y                         |
| y                          | y                          | n                        | y                         |
| Media article              | Media article              | Media article            | Media Article             |

|                           |                            |                                                               |                            |
|---------------------------|----------------------------|---------------------------------------------------------------|----------------------------|
| Personal médico y Sanitar | Philstar.com. 1,062 health | Physician's Weekly. Coron                                     | Prague nurse infected with |
| d/cuba-reporta-que-casi-6 | /04/22/2009075/1062-he     | <a href="https://www.physiciansw">https://www.physiciansw</a> | n-the-czech-republic/pragu |
| m                         | y                          | m                                                             | y                          |
| n                         | y                          | y                                                             | m                          |
| y                         | m                          | y                                                             | m                          |
| y                         | y                          | y                                                             | n                          |
| y                         | y                          | y                                                             | y                          |
| y                         | y                          | y                                                             | m                          |
| Media Article             | Media Article              | Media article                                                 | Media article              |



|                            |                          |                                                               |                          |
|----------------------------|--------------------------|---------------------------------------------------------------|--------------------------|
| Profil. Medizinisches Pers | Prothom Alo. 324 doctors | Public Radio of Armenia. 3                                    | PÚBLICO. Covid-19: "Há d |
| sterreich/medizinisches-p  | gladesh/324-doctors-get- | <a href="https://en.armradio.am/">https://en.armradio.am/</a> | ronavirus-ha-dez-medicos |
| m                          | n                        | y                                                             | n                        |
| m                          | n                        | y                                                             | y                        |
| m                          | n                        | y                                                             | m                        |
| m                          | y                        | y                                                             | y                        |
| y                          | y                        | y                                                             | y                        |
| m                          | y                        | y                                                             | y                        |
| Media article              | Media Article            | Media Article                                                 | Media article            |

|                            |                            |                           |                           |
|----------------------------|----------------------------|---------------------------|---------------------------|
| PÚBLICO. Mais de 1400 p    | Q COSTA RICA. Up to 80%    | Radio Inzamba. Journal du | Radio Reloj. Covid-19; Be |
| hospitais-ja-contrataram-1 | to-80-of-intensive-care-be | zamba.org/journal-du-22-  | /en/news/covid-19-be-res  |
| m                          | y                          | n                         | y                         |
| y                          | y                          | m                         | m                         |
| m                          | y                          | m                         | n                         |
| y                          | y                          | y                         | m                         |
| y                          | y                          | y                         | y                         |
| y                          | y                          | y                         | y                         |
| Media article              | Media article              | Media article             | Media article             |

|                           |                                                                                                                                                                           |                          |                           |
|---------------------------|---------------------------------------------------------------------------------------------------------------------------------------------------------------------------|--------------------------|---------------------------|
| Renascença. Covid-19. To  | Reuters. Exclusive: Large                                                                                                                                                 | Reuters. Masks reused an | Reuters. Uzbek doctor, 39 |
| profissionais-de-saude-in | <a href="https://uk.reuters.com/article/us-health-coronavirus-ekistan-death/uzbek-doct">https://uk.reuters.com/article/us-health-coronavirus-ekistan-death/uzbek-doct</a> |                          |                           |
| n                         | m                                                                                                                                                                         | y                        | m                         |
| y                         | y                                                                                                                                                                         | y                        | y                         |
| m                         | y                                                                                                                                                                         | y                        | y                         |
| y                         | y                                                                                                                                                                         | y                        | y                         |
| y                         | y                                                                                                                                                                         | y                        | y                         |
| y                         | y                                                                                                                                                                         | y                        | m                         |
| Media article             | Media article                                                                                                                                                             | Media article            | Media article             |

|                           |                                                                 |                          |                           |
|---------------------------|-----------------------------------------------------------------|--------------------------|---------------------------|
| Rising COVID-19 infection | RNZ News. Solomon Islan                                         | Romania Insider. Coronav | Romania Insider. Coronav  |
| ons-among-healthcare-w    | <a href="https://www.rferl.org/a/">https://www.rferl.org/a/</a> | er.com/coronavirus-romar | er.com/coronavirus-ro-hea |
| n                         | m                                                               | m                        | n                         |
| n                         | y                                                               | m                        | y                         |
| y                         | y                                                               | n                        | m                         |
| y                         | y                                                               | n                        | y                         |
| y                         | y                                                               | y                        | y                         |
| y                         | y                                                               | y                        | y                         |
| Media article             | Media article                                                   | Media Article            | Media Article             |

|                            |                           |                          |                           |
|----------------------------|---------------------------|--------------------------|---------------------------|
| RPP Noticias. Minsa confir | Running out of beds and g | SÁBADO. Covid-19: Há 1.8 | Schwechat. Coronavirus: I |
| minsa-confirma-el-primer   | /us-health-coronavirus-ja | detalle/covid-19-ha-1845 | -gesundheit/himberger-a   |
| m                          | y                         | n                        | m                         |
| n                          | m                         | y                        | m                         |
| m                          | y                         | m                        | m                         |
| y                          | y                         | y                        | m                         |
| y                          | y                         | y                        | y                         |
| y                          | y                         | y                        | m                         |
| Media article              | Media article             | Media article            | Media article             |

|                                                   |                                                                |                                                       |                                                   |
|---------------------------------------------------|----------------------------------------------------------------|-------------------------------------------------------|---------------------------------------------------|
| Serbia: More than 140 COVID-19 cases              | Seznam Zprávy. V Krumlově se objevily první případy koronaviru | Solomon Islands responds to COVID-19                  | Somali health workers call for more support       |
| a-more-than-140-covid-19-cases-reported-in-serbia | vujte-prarodice-vyzval-vojaci                                  | ific-news/412241/solomon-islands-responds-to-covid-19 | frica/somali-health-workers-call-for-more-support |
| m                                                 | y                                                              | m                                                     | m                                                 |
| y                                                 | m                                                              | m                                                     | y                                                 |
| m                                                 | m                                                              | y                                                     | y                                                 |
| y                                                 | n                                                              | y                                                     | y                                                 |
| n                                                 | y                                                              | y                                                     | y                                                 |
| m                                                 | m                                                              | m                                                     | y                                                 |
| Media article                                     | Media article                                                  | Media article                                         | Media Article                                     |

| Somaliland Standard. Som                                                  | Some 220 Lithuanian med    | South China Morning Pos   | Spain coronavirus deaths |
|---------------------------------------------------------------------------|----------------------------|---------------------------|--------------------------|
| <a href="http://somalilandstandard.com">http://somalilandstandard.com</a> | lithuanian_medical_workers | comment/article/3079677/c | coronavirus-deaths-clim  |
| m                                                                         | n                          | y                         | m                        |
| y                                                                         | n                          | y                         | y                        |
| y                                                                         | n                          | m                         | y                        |
| y                                                                         | m                          | y                         | y                        |
| y                                                                         | y                          | y                         | y                        |
| y                                                                         | y                          | y                         | m                        |
| Media article                                                             | Media article              | Media article             | Media article            |

|                            |                            |                                                                 |                           |
|----------------------------|----------------------------|-----------------------------------------------------------------|---------------------------|
| St. Lucia Times News. Sair | Standard. Radojević: Plavi | Stuff.co.nz. Coronavirus: H                                     | Suman 535 trabajadores d  |
| com/saint-lucia-confirms-f | /uzivo-konferencija-nkt-r  | <a href="https://www.stuff.co.nz/">https://www.stuff.co.nz/</a> | 35-los-trabajadores-de-la |
| y                          | m                          | m                                                               | n                         |
| y                          | m                          | y                                                               | n                         |
| y                          | y                          | y                                                               | m                         |
| m                          | y                          | y                                                               | m                         |
| y                          | y                          | y                                                               | y                         |
| y                          | y                          | y                                                               | y                         |
| Media article              | Media article              | Media Article                                                   | Media Article             |



|                                                           |                                                        |                                                      |                                                         |
|-----------------------------------------------------------|--------------------------------------------------------|------------------------------------------------------|---------------------------------------------------------|
| SZ.de. Tausende Ärzte und<br>politik/coronavirus-aerztes- | teleSUR English. Hondura<br>es-medical-personnel-claim | Tengrinews.kz. 370 меди<br>ws/370-medikov-zarazilis- | The Daily Star. Leading En<br>tors-infected-with-corona |
| y                                                         | n                                                      | y                                                    | m                                                       |
| y                                                         | n                                                      | y                                                    | y                                                       |
| y                                                         | n                                                      | m                                                    | y                                                       |
| y                                                         | m                                                      | y                                                    | y                                                       |
| y                                                         | m                                                      | y                                                    | y                                                       |
| y                                                         | m                                                      | y                                                    | y                                                       |
| Media article                                             | Media article                                          | Media Article                                        | Media Article                                           |

| The Dubrovnik Times. Cor  | The Globe and Mail. Infec   | The Hindu. All 10 active ca | The Hindu. How many do    |
|---------------------------|-----------------------------|-----------------------------|---------------------------|
| /8715-coronavirus-croatia | acle-infected-health-care-w | /all-10-active-cases-in-me  | -in-india/article31410464 |
| m                         | n                           | n                           | y                         |
| n                         | n                           | n                           | m                         |
| m                         | y                           | y                           | y                         |
| y                         | y                           | y                           | y                         |
| y                         | y                           | y                           | y                         |
| m                         | y                           | y                           | y                         |
| Media Article             | Media article               | Media Article               | Media article             |

|                                                    |                           |                                                           |                         |
|----------------------------------------------------|---------------------------|-----------------------------------------------------------|-------------------------|
| The Jakarta Post. 46 medi                          | The Jerusalem post. 55 m  | The Local. Coronavirus LA                                 | The Moscow Times. Coron |
| al-workers-in-semarang-ccical-staff-members-includ | avirus-latest-we-have-a-s | <a href="https://www.themoscow">https://www.themoscow</a> |                         |
| m                                                  | m                         | m                                                         | m                       |
| m                                                  | m                         | m                                                         | y                       |
| m                                                  | y                         | n                                                         | y                       |
| y                                                  | y                         | m                                                         | y                       |
| y                                                  | y                         | y                                                         | y                       |
| y                                                  | y                         | m                                                         | y                       |
| Media Article                                      | Media Article             | Media Article                                             | Media Article           |

|                                        |                               |                               |                             |
|----------------------------------------|-------------------------------|-------------------------------|-----------------------------|
| The New Humanitarian. Venezuela health | The New York Times. 10 Africa | The Star. At least 25 indoors | The Star. Doctors brace for |
| /12/05/venezuela-health                | 0/04/18/world/africa/africa   | 20/04/06/at-least-25-indo     | ctors-brace-for-backlog-as- |
| m                                      | n                             | y                             | n                           |
| m                                      | m                             | y                             | n                           |
| y                                      | y                             | m                             | y                           |
| y                                      | y                             | y                             | y                           |
| y                                      | y                             | y                             | y                           |
| m                                      | y                             | y                             | y                           |
| Media article                          | Media Article                 | Media Article                 | Media article               |

| The Star. Healthcare work                                     | The Star. Laos reports zero | The Washington Post. Hai | Third Ghanaian health wo |
|---------------------------------------------------------------|-----------------------------|--------------------------|--------------------------|
| <a href="https://www.thestar.com">https://www.thestar.com</a> | gional/2020/04/17/laos-r    | next%3f+Washington+pos   | wsArchive/Third-Ghanaia  |
| m                                                             | y                           | y                        | m                        |
| y                                                             | y                           | m                        | y                        |
| y                                                             | m                           | y                        | Y                        |
| y                                                             | y                           | y                        | y                        |
| y                                                             | y                           | y                        | y                        |
| y                                                             | y                           | y                        | Y                        |
| Media article                                                 | Media article               | Media article            | Media article            |

|                                                                   |                           |                              |                        |
|-------------------------------------------------------------------|---------------------------|------------------------------|------------------------|
| Three more medical work                                           | Ticking time bomb as cord | Tirto.ID. 31 Tenaga Medis    | TOLOnews. 35 New COVID |
| <a href="https://24.kg/english/152">https://24.kg/english/152</a> | 04-01-ticking-time-bomb   | dis-berguguran-melawan-C2%A0 | new-covid-19-confi     |
| m                                                                 | m                         | m                            | n                      |
| y                                                                 | m                         | m                            | n                      |
| y                                                                 | m                         | m                            | n                      |
| y                                                                 | y                         | y                            | y                      |
| y                                                                 | y                         | y                            | y                      |
| y                                                                 | y                         | y                            | y                      |
| Media article                                                     | Media article             | Media Article                | Media Article          |

|                                                                                                                                                                |                                                                                                        |                                                                                   |                                                      |
|----------------------------------------------------------------------------------------------------------------------------------------------------------------|--------------------------------------------------------------------------------------------------------|-----------------------------------------------------------------------------------|------------------------------------------------------|
| World Socialist Web Site.<br><a href="https://www.wsws.org/en/articles/2020/04/22/kaza-a22.html">https://www.wsws.org/en/articles/2020/04/22/kaza-a22.html</a> | The Guardian. Doctors, nurses<br><a href="https://www.theguardian.com">https://www.theguardian.com</a> | TSF. Há 2131 profissionais de saúde infetados<br>profissionais-de-saude-infetados | UN Women – Headquarters<br>/2020/4/feature-nurses-in |
| n                                                                                                                                                              | m                                                                                                      | m                                                                                 | y                                                    |
| y                                                                                                                                                              | m                                                                                                      | y                                                                                 | y                                                    |
| y                                                                                                                                                              | m                                                                                                      | m                                                                                 | y                                                    |
| y                                                                                                                                                              | m                                                                                                      | y                                                                                 | y                                                    |
| y                                                                                                                                                              | m                                                                                                      | y                                                                                 | y                                                    |
| y                                                                                                                                                              | m                                                                                                      | y                                                                                 | y                                                    |
| Media article                                                                                                                                                  | Media article                                                                                          | Media article                                                                     | Media Article                                        |

| Virus cases among Pakistan                                                                                                                                                      | Virus Knocks Thousands dead | Voice of America. Entire Botswana | Voice of Nigeria. COVID-19 |
|---------------------------------------------------------------------------------------------------------------------------------------------------------------------------------|-----------------------------|-----------------------------------|----------------------------|
| <a href="https://www.aa.com.tr/en/03/24/world/europe/coronavirus-outbreak/entire-botswana">https://www.aa.com.tr/en/03/24/world/europe/coronavirus-outbreak/entire-botswana</a> |                             |                                   |                            |
| m                                                                                                                                                                               | y                           | m                                 | y                          |
| y                                                                                                                                                                               | m                           | y                                 | y                          |
| y                                                                                                                                                                               | m                           | y                                 | y                          |
| y                                                                                                                                                                               | y                           | y                                 | y                          |
| y                                                                                                                                                                               | y                           | y                                 | y                          |
| y                                                                                                                                                                               | y                           | y                                 | y                          |
| Media Article                                                                                                                                                                   | Media article               | Media article                     | Media article              |



|                           |                             |                                                             |                           |
|---------------------------|-----------------------------|-------------------------------------------------------------|---------------------------|
| WHO. Algeria's main lab a | Wikipedia. Healthcare in #  | World Socialist Web Site.                                   | World Today News. There   |
| /news/algerias-main-lab-a | ikipedia.org/wiki/Healthcar | <a href="https://www.wsws.org/e">https://www.wsws.org/e</a> | there-are-1332-infected-h |
| m                         | n                           | m                                                           | y                         |
| m                         | m                           | y                                                           | y                         |
| y                         | m                           | y                                                           | m                         |
| y                         | y                           | y                                                           | y                         |
| y                         | y                           | y                                                           | y                         |
| y                         | y                           | y                                                           | y                         |
| Media Article             | Media article               | Media article                                               | Media article             |

|                                                                |                            |                           |                           |
|----------------------------------------------------------------|----------------------------|---------------------------|---------------------------|
| Xinhua. 59 healthcare wo                                       | Xinhua. China publishes ti | Xinhua. Coronavirus cases | Xinhua. Laos detects no n |
| <a href="http://www.xinhuanet.com">http://www.xinhuanet.co</a> | et.com/english/2020-04/0   | et.com/english/2020-04/0  | et.com/english/2020-04/1  |
| n                                                              | m                          | n                         | n                         |
| y                                                              | m                          | n                         | m                         |
| y                                                              | y                          | y                         | y                         |
| y                                                              | y                          | y                         | m                         |
| y                                                              | y                          | y                         | y                         |
| y                                                              | y                          | y                         | y                         |
| Media article                                                  | Media Article              | Media Article             | Media article             |

|                                                       |                           |                         |                             |
|-------------------------------------------------------|---------------------------|-------------------------|-----------------------------|
| Xinhua. Nearly 100 Cuban health-workers-test-positive | Xinhua. Number of China's | Yemen has 1st confirmed | Yle Uutiset. Helsinki heart |
|                                                       | et.com/english/2019-05/2  | r-ravaged-yemen-announ  | _tests_positive_for_coron   |
| y                                                     | n                         | y                       | m                           |
| m                                                     | y                         | m                       | m                           |
| n                                                     | y                         | m                       | y                           |
| m                                                     | y                         | y                       | y                           |
| y                                                     | y                         | y                       | y                           |
| y                                                     | y                         | y                       | y                           |
| Media article                                         | Media article             | Media article           | Media article               |

|                          |                             |                                                                         |                                                                   |
|--------------------------|-----------------------------|-------------------------------------------------------------------------|-------------------------------------------------------------------|
| ZAWYA MENA Edition. Co   | ZICO Law. Lao PDR Updat     | В Андижане 78 медробо                                                   | В Кыргызстане зафиксир                                            |
| Covid19_kills_3_doctors_ | ources/alerts/lao-pdr-updat | <a href="https://centralasia.media/news:1">centralasia.media/news:1</a> | <a href="https://kloop.kg/blog/202">https://kloop.kg/blog/202</a> |
| y                        | y                           | m                                                                       | m                                                                 |
| m                        | y                           | y                                                                       | y                                                                 |
| m                        | y                           | y                                                                       | y                                                                 |
| m                        | y                           | y                                                                       | y                                                                 |
| y                        | y                           | y                                                                       | y                                                                 |
| m                        | y                           | y                                                                       | y                                                                 |
| Media article            | Media article               | Media article                                                           | Media article                                                     |

| Коронавирусом заражен      | Коронавирусом заражен  | Список памяти [Internet] | Число зараженных коро   |
|----------------------------|------------------------|--------------------------|-------------------------|
| -kyrgyzstane-za-sutki-ot-c | /13549619/Koronaviruso | google.com/view/covid-m  | ajennyih_koronavirusom_ |
| m                          | m                      | n                        | m                       |
| y                          | m                      | m                        | y                       |
| m                          | y                      | m                        | m                       |
| y                          | y                      | y                        | y                       |
| y                          | y                      | y                        | y                       |
| y                          | y                      | y                        | y                       |
| Media article              | Media article          | Media article            | Media article           |

| Egyptian Medical Syndicat | Minister Hamad Hass (qu | uto Mexicano del Seguro S | Nirupam Das    |
|---------------------------|-------------------------|---------------------------|----------------|
| Primary Source            | Primary Source          | Primary Source            | Primary Source |
| y                         | y                       | y                         | m              |
| n                         | y                       | y                         | m              |
| n                         | n                       | y                         | n              |
| n                         | m                       | y                         | m              |
| y                         | y                       | y                         | y              |
| m                         | y                       | y                         | y              |
| Primary source            | Primary source          | Primary source            | Primary source |

| CEBM. COVID-19 How many health workers are needed to control the epidemic? | CIHI. Physicians in Canada | Coronavirus (COVID-19) Transmission | Coronavirus Pandemic (COVID-19) |
|----------------------------------------------------------------------------|----------------------------|-------------------------------------|---------------------------------|
| 9/covid-19-how-many-health-workers-are-needed-to-control-the-epidemic      | www.cihi.ca/en/physicians  | worldindata.org/coronavirus         | ourworldindata.org/coronavirus  |
| y                                                                          | y                          | y                                   | y                               |
| y                                                                          | n                          | m                                   | m                               |
| y                                                                          | y                          | y                                   | y                               |
| y                                                                          | y                          | y                                   | y                               |
| y                                                                          | y                          | y                                   | y                               |
| y                                                                          | y                          | y                                   | y                               |
| Research/academic report                                                   | Research/academic report   | Research/academic report            | Research/academic report        |

|                           |                           |                           |                                                               |
|---------------------------|---------------------------|---------------------------|---------------------------------------------------------------|
| Download today's data or  | Health - OECD Data [Inter | Health Care Resources : H | Koch Institute R. COVID-1                                     |
| a/download-todays-data-or | s://data.oecd.org/health  | s.oecd.org/index.aspx?que | <a href="https://www.rki.de/DE/C">https://www.rki.de/DE/C</a> |
| y                         | y                         | y                         | y                                                             |
| y                         | m                         | y                         | y                                                             |
| y                         | y                         | y                         | y                                                             |
| y                         | y                         | y                         | y                                                             |
| y                         | y                         | y                         | y                                                             |
| y                         | y                         | y                         | y                                                             |
| Research/academic report  | Research/academic report  | Research/academic report  | Research/academic report                                      |



|                          |                          |                           |                            |
|--------------------------|--------------------------|---------------------------|----------------------------|
| Kongsap Akkhavong, Char  | Managing Access and Tim  | Policy Responses to COVI  | Practicing Physicians Dens |
| 99s%20Democratic%20Re    | managing-access-and-tim  | ics/imf-and-covid19/Polim | /nmx/timeseries/urugua     |
| y                        | y                        | m                         | m                          |
| y                        | y                        | m                         | m                          |
| y                        | y                        | m                         | y                          |
| y                        | y                        | m                         | y                          |
| y                        | y                        | y                         | y                          |
| y                        | y                        | m                         | y                          |
| Research/academic report | Research/academic report | Research/academic report  | Research/academic report   |

|                            |                                            |                            |                          |
|----------------------------|--------------------------------------------|----------------------------|--------------------------|
| Safurah Jaafar, Kamaliah I | Sorveglianza Integrata CO                  | Statista. Qatar: number of | TRADING ECONOMICS [Ir    |
| tream/handle/10665.1/52    | <a href="#">coronavirus/bollettino/Inf</a> | sicians%20in%20Qatar%20    | tradingeconomics.com     |
| y                          | y                                          | y                          | y                        |
| y                          | y                                          | y                          | y                        |
| y                          | y                                          | m                          | y                        |
| y                          | y                                          | y                          | y                        |
| y                          | y                                          | y                          | y                        |
| y                          | y                                          | y                          | y                        |
| Research/academic report   | Research/academic report                   | Research/academic report   | Research/academic report |

|                             |                                                                                                                 |                          |                            |
|-----------------------------|-----------------------------------------------------------------------------------------------------------------|--------------------------|----------------------------|
| Community health worker     | Coronavirus Disease 2019                                                                                        | Coronavirus Disease 2019 | COVID-19 Canada [Internet] |
| worldbank.org/indicator/SH. | <a href="https://www.rki.de/DE/Content/coronavirus-diseas">https://www.rki.de/DE/Content/coronavirus-diseas</a> |                          | sources-covid19canada.hub  |
| y                           | y                                                                                                               | y                        | m                          |
| y                           | y                                                                                                               | y                        | y                          |
| y                           | y                                                                                                               | y                        | y                          |
| y                           | y                                                                                                               | y                        | y                          |
| y                           | y                                                                                                               | y                        | y                          |
| y                           | y                                                                                                               | y                        | y                          |
| Research/academic report    | Research/academic report                                                                                        | Research/academic report | Research/academic report   |

|                                                             |                              |                            |                            |
|-------------------------------------------------------------|------------------------------|----------------------------|----------------------------|
| CPME. National updates [                                    | Fazla D, Kaybetmemek A,      | Highlights J. Regulated Nu | Ministry of Health of Tuva |
| <a href="https://www.cpme.eu/co">https://www.cpme.eu/co</a> | /userfiles/files/ttbcovid-so | ducts/regulated-nurses-2   | ult/files/country/documer  |
| m                                                           | y                            | y                          | y                          |
| y                                                           | m                            | y                          | y                          |
| m                                                           | y                            | y                          | y                          |
| y                                                           | m                            | y                          | y                          |
| y                                                           | y                            | y                          | y                          |
| y                                                           | y                            | y                          | y                          |
| Research/academic report                                    | Research/academic report     | Research/academic report   | Research/academic report   |

|                          |                                                                                                                                                                                                                             |                           |                            |
|--------------------------|-----------------------------------------------------------------------------------------------------------------------------------------------------------------------------------------------------------------------------|---------------------------|----------------------------|
| MMWR. Characteristics of | NIGER: COVID-19 Situatio                                                                                                                                                                                                    | ReliefWeb. Afghanistan: C | Gabon indigents scheme     |
| /mmwr/volumes/69/wr/p    | <a href="https://reliefweb.int/sites/reliefweb.int/files/2020-05/Niger-COVID-19-Situation-Report-2020-05-14.pdf">https://reliefweb.int/sites/reliefweb.int/files/2020-05/Niger-COVID-19-Situation-Report-2020-05-14.pdf</a> | stan-covid-19-multi-secto | 73701542/Gabon-indigen     |
| y                        | y                                                                                                                                                                                                                           | y                         | y                          |
| y                        | y                                                                                                                                                                                                                           | y                         | y                          |
| y                        | y                                                                                                                                                                                                                           | y                         | y                          |
| y                        | y                                                                                                                                                                                                                           | y                         | y                          |
| y                        | y                                                                                                                                                                                                                           | y                         | y                          |
| y                        | y                                                                                                                                                                                                                           | y                         | y                          |
| Research/academic report | Research/academic report                                                                                                                                                                                                    | Research/academic report  | Statistical report website |

|                            |                                                                     |                            |                             |
|----------------------------|---------------------------------------------------------------------|----------------------------|-----------------------------|
| Coronavirus Pandemic (C    | COVID-19 i Danmark Epid                                             | Healthcare personnel stat  | Healthcare personnel stat   |
| org/coronavirus?country=2  | <a href="https://files.ssi.dk/COVID">https://files.ssi.dk/COVID</a> | explained/index.php/Heal   | urostat/statistics-explaine |
| y                          | y                                                                   | n                          | n                           |
| m                          | y                                                                   | n                          | n                           |
| y                          | y                                                                   | y                          | y                           |
| y                          | y                                                                   | y                          | y                           |
| y                          | y                                                                   | y                          | y                           |
| y                          | y                                                                   | y                          | y                           |
| Statistical report website | Statistical report website                                          | Statistical report website | Statistical report website  |

|                                  |                                                                                                                          |                                                                                                                                                                                                  |                                                                                                                                                                                                   |
|----------------------------------|--------------------------------------------------------------------------------------------------------------------------|--------------------------------------------------------------------------------------------------------------------------------------------------------------------------------------------------|---------------------------------------------------------------------------------------------------------------------------------------------------------------------------------------------------|
| Hospital beds (per 1,000 people) | IndexMundi [Internet]. [cited 2020]. Available from: <a href="https://www.indexmundi.com">https://www.indexmundi.com</a> | ILOPOP. Madagascar [Internet]. [cited 2020]. Available from: <a href="https://www.indexmundi.com/resources/countries-territories">https://www.indexmundi.com/resources/countries-territories</a> | WHO. Health Profile [Internet]. [cited 2020]. Available from: <a href="https://www.who.int/data/directory/indicators?locations=MD">https://www.who.int/data/directory/indicators?locations=MD</a> |
|                                  |                                                                                                                          |                                                                                                                                                                                                  |                                                                                                                                                                                                   |
| y                                | y                                                                                                                        | m                                                                                                                                                                                                | y                                                                                                                                                                                                 |
| y                                | n                                                                                                                        | n                                                                                                                                                                                                | m                                                                                                                                                                                                 |
| y                                | m                                                                                                                        | y                                                                                                                                                                                                | y                                                                                                                                                                                                 |
| y                                | y                                                                                                                        | y                                                                                                                                                                                                | y                                                                                                                                                                                                 |
| y                                | y                                                                                                                        | n                                                                                                                                                                                                | y                                                                                                                                                                                                 |
| y                                | y                                                                                                                        | y                                                                                                                                                                                                | y                                                                                                                                                                                                 |
| Statistical report website       | Statistical report website                                                                                               | Statistical report website                                                                                                                                                                       | Statistical report website                                                                                                                                                                        |

| Population by Country [In   | SSB. Health care personne  | Statista. Health & Pharma  | Table 1. Global burden of  |
|-----------------------------|----------------------------|----------------------------|----------------------------|
| ers.info/world-populations: | ://www.ssb.no/en/hesosa    | a.com/markets/412/health   | burden_of_COVID-19_pa      |
| y                           | y                          | y                          | n                          |
| y                           | y                          | y                          | y                          |
| y                           | y                          | n                          | y                          |
| y                           | y                          | m                          | y                          |
| y                           | y                          | y                          | y                          |
| y                           | y                          | y                          | y                          |
| Statistical report website  | Statistical report website | Statistical report website | Statistical report website |



|                            |                            |                            |                            |
|----------------------------|----------------------------|----------------------------|----------------------------|
| The World Bank. Nurses a   | The World Bank. Physical   | The World Bank. Specialis  | Voice of Nigeria. COVID-1  |
| rldbank.org/indicator/SH.  | orldbank.org/indicator/SH  | orldbank.org/indicator/SH  | ovid-19-in-africa-112-hea  |
| y                          | y                          | y                          | m                          |
| y                          | y                          | m                          | n                          |
| y                          | y                          | y                          | n                          |
| y                          | y                          | y                          | y                          |
| y                          | y                          | y                          | y                          |
| y                          | y                          | y                          | m                          |
| Statistical report website | Statistical report website | Statistical report website | Statistical report website |

|                                                      |                                                     |                                                     |                                                      |
|------------------------------------------------------|-----------------------------------------------------|-----------------------------------------------------|------------------------------------------------------|
| WorldAtlas. Countries With<br>with%20its%2077.4%20ph | Worldometer. Coronaviru<br>www.worldometers.info/co | Africanews. WHO COVID-<br>/03/22/who-covid-19-react | Coronavirus (COVID-19) in<br>tuments/2010/Health_Sys |
| n                                                    | y                                                   | y                                                   | y                                                    |
| n                                                    | m                                                   | m                                                   | m                                                    |
| n                                                    | y                                                   | y                                                   | y                                                    |
| y                                                    | y                                                   | y                                                   | y                                                    |
| y                                                    | y                                                   | y                                                   | y                                                    |
| y                                                    | y                                                   | y                                                   | y                                                    |
| Statistical report website                           | Statistical report website                          | WHO                                                 | WHO                                                  |

|                            |                                           |                          |                         |
|----------------------------|-------------------------------------------|--------------------------|-------------------------|
| Manuel M. Dayrit, Liezel P | WHO. WHO calls for health                 | Observatory of Human Re  | PRIMARY HEALTH CARE S   |
| 20Philippines%20Health%    | <a href="#">healthy-safe-and-decent-w</a> | lth-caribbean-review-wor | -hpsr/projects/AHPSR-PR |
| y                          | y                                         | y                        | y                       |
| m                          | m                                         | y                        | m                       |
| y                          | m                                         | y                        | y                       |
| y                          | m                                         | y                        | y                       |
| y                          | y                                         | y                        | y                       |
| y                          | m                                         | y                        | y                       |
| WHO                        | WHO                                       | WHO                      | WHO                     |

| Regional Office for Africa.<br>s/outbreaks-and-emergen | Regional Office for Africa.<br>au-deliver-critical-supplie | Report of the WHO-China<br>/coronaviruse/who-china | The Gambia COVID-19 Ou<br>ploads/2020/04/The_Ga |
|--------------------------------------------------------|------------------------------------------------------------|----------------------------------------------------|-------------------------------------------------|
| y                                                      | y                                                          | y                                                  | y                                               |
| m                                                      | y                                                          | y                                                  | y                                               |
| y                                                      | y                                                          | y                                                  | y                                               |
| y                                                      | y                                                          | y                                                  | y                                               |
| y                                                      | y                                                          | y                                                  | y                                               |
| y                                                      | y                                                          | y                                                  | y                                               |
| WHO                                                    | WHO                                                        | WHO                                                | WHO                                             |

| The Kingdom of Thailand                                                              | Weekly bulletin on outbreaks/disease-outbreaks/outbreaks | WHO   HRH Country Webworkforcealliance/countries | WHO Coronavirus Disease                                         |
|--------------------------------------------------------------------------------------|----------------------------------------------------------|--------------------------------------------------|-----------------------------------------------------------------|
| <a href="http://wpro.who.int/handle/10665/10665">wpro.who.int/handle/10665/10665</a> |                                                          |                                                  | <a href="https://covid19.who.int/">https://covid19.who.int/</a> |
| y                                                                                    | y                                                        | y                                                | y                                                               |
| y                                                                                    | y                                                        | y                                                | m                                                               |
| y                                                                                    | y                                                        | y                                                | n                                                               |
| y                                                                                    | y                                                        | y                                                | m                                                               |
| y                                                                                    | y                                                        | y                                                | y                                                               |
| y                                                                                    | y                                                        | y                                                | y                                                               |
| WHO                                                                                  | WHO                                                      | WHO                                              | WHO                                                             |

| WHO Thailand Situation Report | Coronavirus Disease (COVID-19) | El Salvador [Internet]. [cited 2020 May 8]. Available from: <a href="https://www.paho.org/salud-en-las-americanas/march2013health_emergency_risk_management">https://www.paho.org/salud-en-las-americanas/march2013health_emergency_risk_management</a> | Emergency Risk Management |
|-------------------------------|--------------------------------|---------------------------------------------------------------------------------------------------------------------------------------------------------------------------------------------------------------------------------------------------------|---------------------------|
| y                             | y                              | y                                                                                                                                                                                                                                                       | y                         |
| y                             | y                              | m                                                                                                                                                                                                                                                       | y                         |
| y                             | y                              | y                                                                                                                                                                                                                                                       | y                         |
| y                             | y                              | y                                                                                                                                                                                                                                                       | y                         |
| y                             | y                              | y                                                                                                                                                                                                                                                       | y                         |
| y                             | y                              | y                                                                                                                                                                                                                                                       | y                         |
| WHO                           | WHO report                     | WHO report                                                                                                                                                                                                                                              | WHO report                |

|                         |                         |                           |                        |
|-------------------------|-------------------------|---------------------------|------------------------|
| FEDERATED STATES OF M   | Human resources for hea | ReliefWeb. 2017 Review d  | WHO   Lesotho. WHO. 20 |
| y/handle/10665.1/13947/ | ream/handle/10665.1/10  | /report/libya/2017-review | www.who.int/countries/ |
| y                       | y                       | y                         | y                      |
| m                       | m                       | y                         | y                      |
| y                       | y                       | y                         | y                      |
| y                       | y                       | y                         | y                      |
| y                       | y                       | y                         | y                      |
| y                       | y                       | y                         | y                      |
| WHO report              | WHO report              | WHO report                | WHO report             |

| Global Health Observatory                                                     | Health Care Systems in Tr                                                                                        | Health system reviews (H                                                                                   | Situation update for the V                                          |
|-------------------------------------------------------------------------------|------------------------------------------------------------------------------------------------------------------|------------------------------------------------------------------------------------------------------------|---------------------------------------------------------------------|
| <a href="https://apps.who.int/gho/data/node.main">.int/gho/data/node.main</a> | <a href="https://apps.who.int/gho/data/assets/pdf_file/2020/system%20reviews%20">nt/___data/assets/pdf_file,</a> | <a href="https://apps.who.int/gho/data/assets/pdf_file/2020/system%20reviews%20">20system%20reviews%20</a> | <a href="https://apps.who.int/iris/">https://apps.who.int/iris/</a> |
| y                                                                             | y                                                                                                                | y                                                                                                          | y                                                                   |
| y                                                                             | m                                                                                                                | n                                                                                                          | y                                                                   |
| Y                                                                             | y                                                                                                                | y                                                                                                          | y                                                                   |
| Y                                                                             | y                                                                                                                | m                                                                                                          | y                                                                   |
| y                                                                             | y                                                                                                                | y                                                                                                          | y                                                                   |
| y                                                                             | y                                                                                                                | y                                                                                                          | y                                                                   |
| WHO report                                                                    | WHO report                                                                                                       | WHO report                                                                                                 | WHO report                                                          |



|                                                                     |                                                                             |
|---------------------------------------------------------------------|-----------------------------------------------------------------------------|
| Situation update for the V                                          | WHO   World Health Statistics 2017: Monitoring health for the SDGs. WHO. 20 |
| <a href="https://apps.who.int/iris/">https://apps.who.int/iris/</a> | istics%20series%20is%20WHO%E2%80%99s%20annual,are%20making%20pro            |
| y                                                                   | y                                                                           |
| y                                                                   | m                                                                           |
| y                                                                   | y                                                                           |
| y                                                                   | y                                                                           |
| y                                                                   | y                                                                           |
| y                                                                   | y                                                                           |
| WHO report                                                          | WHO report                                                                  |

gress%20towards%20the%20health-related%20SDG%20targets.
