# Supplementary material for: Infection and mortality of healthcare workers worldwide from COVID-19: a systematic review
Source: PubMed Central journal article supplement — BMJ Glob Health. 2020 Dec 4;5(12):e003097. doi: 10.1136/bmjgh-2020-003097 (PMC7722361; doi:10.1136/bmjgh-2020-003097), 2020-12-04
Supplement: bmjgh-2020-003097supp008.pdf [file bmjgh-2020-003097supp008.pdf]

| Publication Type            | Journal Article                                                 | Journal Article                                                   | Journal Article                                                     |
|-----------------------------|-----------------------------------------------------------------|-------------------------------------------------------------------|---------------------------------------------------------------------|
| Reference                   | Burrer SL, de Perio MA, H                                       | Canova V, Lederer Schläp                                          | Rhodes A, Ferdinande P, F                                           |
| Link to data source         | <a href="https://www.ncbi.nlm.nih">https://www.ncbi.nlm.nih</a> | <a href="https://doi.org/10.4414/s">https://doi.org/10.4414/s</a> | <a href="https://link.springer.com/">https://link.springer.com/</a> |
| Type of article             | Cross-sectional Study                                           | Cross-sectional Study                                             | Cross-sectional Study                                               |
| Was the research question   | n                                                               | y                                                                 | y                                                                   |
| Was the study population y  |                                                                 | y                                                                 | y                                                                   |
| Were all the subjects sele  | NA                                                              | y                                                                 | y                                                                   |
| Was a sample size justific  | NA                                                              | NA                                                                | NA                                                                  |
| For the analyses in this pa |                                                                 | y                                                                 | NA                                                                  |
| Was the timeframe suffici   | NA                                                              | y                                                                 | NA                                                                  |
| For exposures that can va   | NA                                                              | NA                                                                | NA                                                                  |
| Were the exposure measu     | y                                                               | y                                                                 | NA                                                                  |
| Was the exposure(s) assen   | n                                                               | NA                                                                | NA                                                                  |
| Were the outcome measu      | y                                                               | y                                                                 | y                                                                   |
| Were the outcome assess     | NA                                                              | NA                                                                | NA                                                                  |
| Was loss to follow-up afte  | NA                                                              | NA                                                                | NA                                                                  |
| Were key potential confou   | y                                                               | y                                                                 | y                                                                   |
| Quality Rating              | Fair                                                            | Good                                                              | Good                                                                |

| Journal Article                                                 | Journal Article                                                 | Journal Article                                                 | Journal Article                                             |
|-----------------------------------------------------------------|-----------------------------------------------------------------|-----------------------------------------------------------------|-------------------------------------------------------------|
| Reusken CB, Buiting A, Ble                                      | Xing Y, Mo P, Xiao Y, Zhao                                      | Huang L, Lin G, Tang L, Yu                                      | Litton E, Bucci T, Chavan S                                 |
| <a href="https://www.eurosurveill">https://www.eurosurveill</a> | <a href="https://www.ncbi.nlm.nih">https://www.ncbi.nlm.nih</a> | <a href="https://www.ncbi.nlm.nih">https://www.ncbi.nlm.nih</a> | <a href="https://www.mja.com.au">https://www.mja.com.au</a> |
| Cross-sectional Study                                           | Cross-sectional Study                                           | Review                                                          | Cross-sectional Study                                       |
| n                                                               | y                                                               | NA                                                              | y                                                           |
| y                                                               | y                                                               | NA                                                              | y                                                           |
| y                                                               | y                                                               | NA                                                              | y                                                           |
| NA                                                              | NA                                                              | NA                                                              | NA                                                          |
| NA                                                              | NA                                                              | NA                                                              | NA                                                          |
| NA                                                              | NA                                                              | NA                                                              | NA                                                          |
| NA                                                              | NA                                                              | NA                                                              | NA                                                          |
| NA                                                              | NA                                                              | NA                                                              | NA                                                          |
| NA                                                              | NA                                                              | NA                                                              | NA                                                          |
| y                                                               | y                                                               | NA                                                              | y                                                           |
| NA                                                              | NA                                                              | NA                                                              | NA                                                          |
| NA                                                              | NA                                                              | NA                                                              | NA                                                          |
| y                                                               | y                                                               | NA                                                              | y                                                           |
| Fair                                                            | Good                                                            | NA                                                              | Good                                                        |

| Journal Article                                                            | Journal Article                                                 | Journal Article                                                 | Journal Article                                                 |
|----------------------------------------------------------------------------|-----------------------------------------------------------------|-----------------------------------------------------------------|-----------------------------------------------------------------|
| Phua J, Faruq MO, Kulkarr Fowler RA, Abdelmalik P, Economou C. Greece: Hez | Wang D, Hu B, Hu C, Zhu f                                       |                                                                 |                                                                 |
| <a href="https://www.ncbi.nlm.nih">https://www.ncbi.nlm.nih</a>            | <a href="https://www.ncbi.nlm.nih">https://www.ncbi.nlm.nih</a> | <a href="https://www.ncbi.nlm.nih">https://www.ncbi.nlm.nih</a> | <a href="https://www.ncbi.nlm.nih">https://www.ncbi.nlm.nih</a> |
| Cross-sectional Study                                                      | Cross-sectional Study                                           | Review                                                          | Retrospective Cohort                                            |
| Y                                                                          | Y                                                               | NA                                                              | Y                                                               |
| Y                                                                          | Y                                                               | NA                                                              | Y                                                               |
| Y                                                                          | Y                                                               | NA                                                              | Y                                                               |
| NA                                                                         | NA                                                              | NA                                                              | NA                                                              |
| NA                                                                         | NA                                                              | NA                                                              | NA                                                              |
| NA                                                                         | NA                                                              | NA                                                              | Y                                                               |
| NA                                                                         | NA                                                              | NA                                                              | NA                                                              |
| NA                                                                         | NA                                                              | NA                                                              | Y                                                               |
| NA                                                                         | NA                                                              | NA                                                              | NA                                                              |
| Y                                                                          | Y                                                               | NA                                                              | Y                                                               |
| NA                                                                         | NA                                                              | NA                                                              | NA                                                              |
| NA                                                                         | NA                                                              | NA                                                              | NA                                                              |
| Y                                                                          | Y                                                               | NA                                                              | Y                                                               |
| Good                                                                       | Good                                                            | NA                                                              | Good                                                            |

| Journal Article                                                 | Journal Article                                                 | Journal Article                                                 | Journal Article                                               |
|-----------------------------------------------------------------|-----------------------------------------------------------------|-----------------------------------------------------------------|---------------------------------------------------------------|
| The Lancet. COVID-19: pro                                       | Wu Z, McGoogan JM. Cha                                          | Heinzerling A, Stuckey MJ                                       | Li R, Rivers C, Tan Q, Murr                                   |
| <a href="https://www.thelancet.co">https://www.thelancet.co</a> | <a href="https://www.ncbi.nlm.nih">https://www.ncbi.nlm.nih</a> | <a href="https://www.ncbi.nlm.nih">https://www.ncbi.nlm.nih</a> | <a href="https://pubmed.ncbi.nlm">https://pubmed.ncbi.nlm</a> |
| Editorial                                                       | Viewpoint                                                       | Cross-sectional Study                                           | Modelling study                                               |
| NA                                                              | NA                                                              | n                                                               | NA                                                            |
| NA                                                              | NA                                                              | y                                                               | NA                                                            |
| NA                                                              | NA                                                              | y                                                               | NA                                                            |
| NA                                                              | NA                                                              | NA                                                              | NA                                                            |
| NA                                                              | NA                                                              | NA                                                              | NA                                                            |
| NA                                                              | NA                                                              | NA                                                              | NA                                                            |
| NA                                                              | NA                                                              | NA                                                              | NA                                                            |
| NA                                                              | NA                                                              | NA                                                              | NA                                                            |
| NA                                                              | NA                                                              | NA                                                              | NA                                                            |
| NA                                                              | NA                                                              | y                                                               | NA                                                            |
| NA                                                              | NA                                                              | NA                                                              | NA                                                            |
| NA                                                              | NA                                                              | NA                                                              | NA                                                            |
| NA                                                              | NA                                                              | y                                                               | NA                                                            |
| NA                                                              | NA                                                              | Fair                                                            | NA                                                            |

|                                                                                                                                                                                                                                                                                                                                                       |                 |
|-------------------------------------------------------------------------------------------------------------------------------------------------------------------------------------------------------------------------------------------------------------------------------------------------------------------------------------------------------|-----------------|
| Journal Article                                                                                                                                                                                                                                                                                                                                       | Journal Article |
| Zhan M, Qin Y, Xue X, Zhu Kang SK. COVID-19 and MERS Infections in Healthcare Workers in Korea. Vol. 1<br><a href="https://www.nejm.org/doi/10.1093/ajph/111.10.1811">https://www.nejm.org/doi/10.1093/ajph/111.10.1811</a> <a href="https://www.ncbi.nlm.nih.gov/pmc/articles/PMC7204702/">https://www.ncbi.nlm.nih.gov/pmc/articles/PMC7204702/</a> |                 |
| Cross-sectional Study                                                                                                                                                                                                                                                                                                                                 | Review          |
| n                                                                                                                                                                                                                                                                                                                                                     | NA              |
| y                                                                                                                                                                                                                                                                                                                                                     | NA              |
| y                                                                                                                                                                                                                                                                                                                                                     | NA              |
| NA                                                                                                                                                                                                                                                                                                                                                    | NA              |
| y                                                                                                                                                                                                                                                                                                                                                     | NA              |
| NA                                                                                                                                                                                                                                                                                                                                                    | NA              |
| NA                                                                                                                                                                                                                                                                                                                                                    | NA              |
| y                                                                                                                                                                                                                                                                                                                                                     | NA              |
| Fair                                                                                                                                                                                                                                                                                                                                                  | NA              |

.1, Safety and Health at Work. Elsevier Science B.V.; 2020. p. 125–6.
