# Supplementary material for: Infection and mortality of healthcare workers worldwide from COVID-19: a systematic review
Source: PubMed Central journal article supplement — BMJ Glob Health. 2020 Dec 4;5(12):e003097. doi: 10.1136/bmjgh-2020-003097 (PMC7722361; doi:10.1136/bmjgh-2020-003097), 2020-12-04
Supplement: bmjgh-2020-003097supp009.pdf [file bmjgh-2020-003097supp009.pdf]

### Appendix S8: Supplementary figures for the number of COVID-19 infections and deaths reported in healthcare worker per country as of 8<sup>th</sup> May 2020

Countries reporting 100+ cases

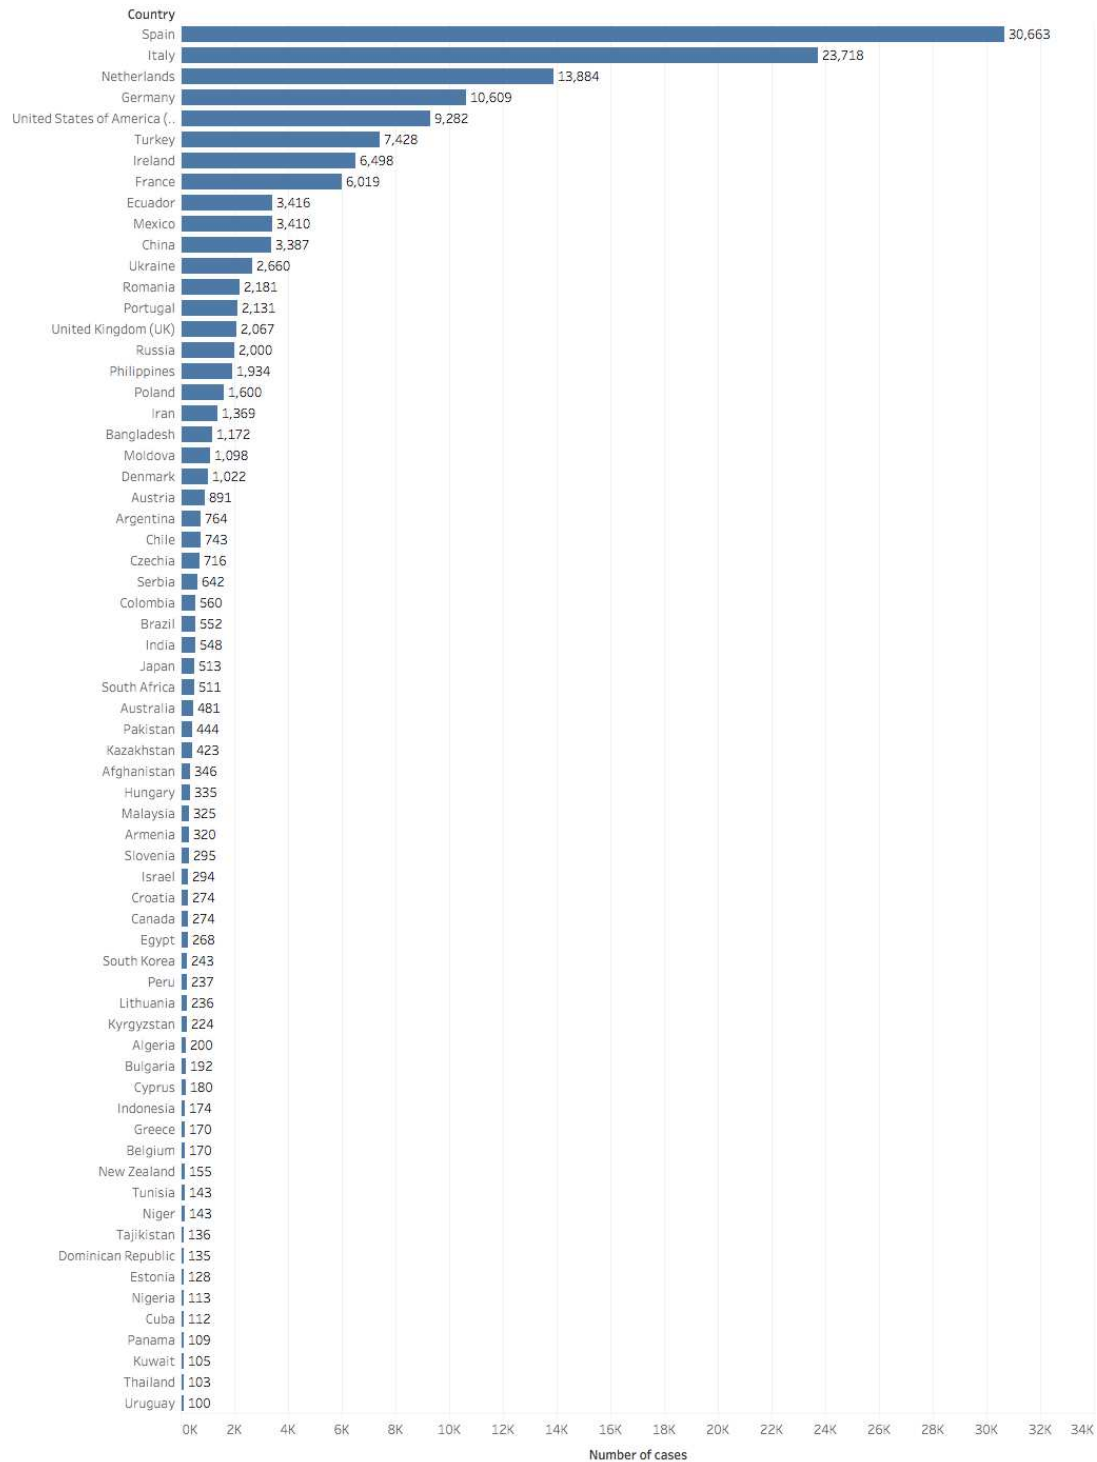

## Countries reporting less than 100 cases

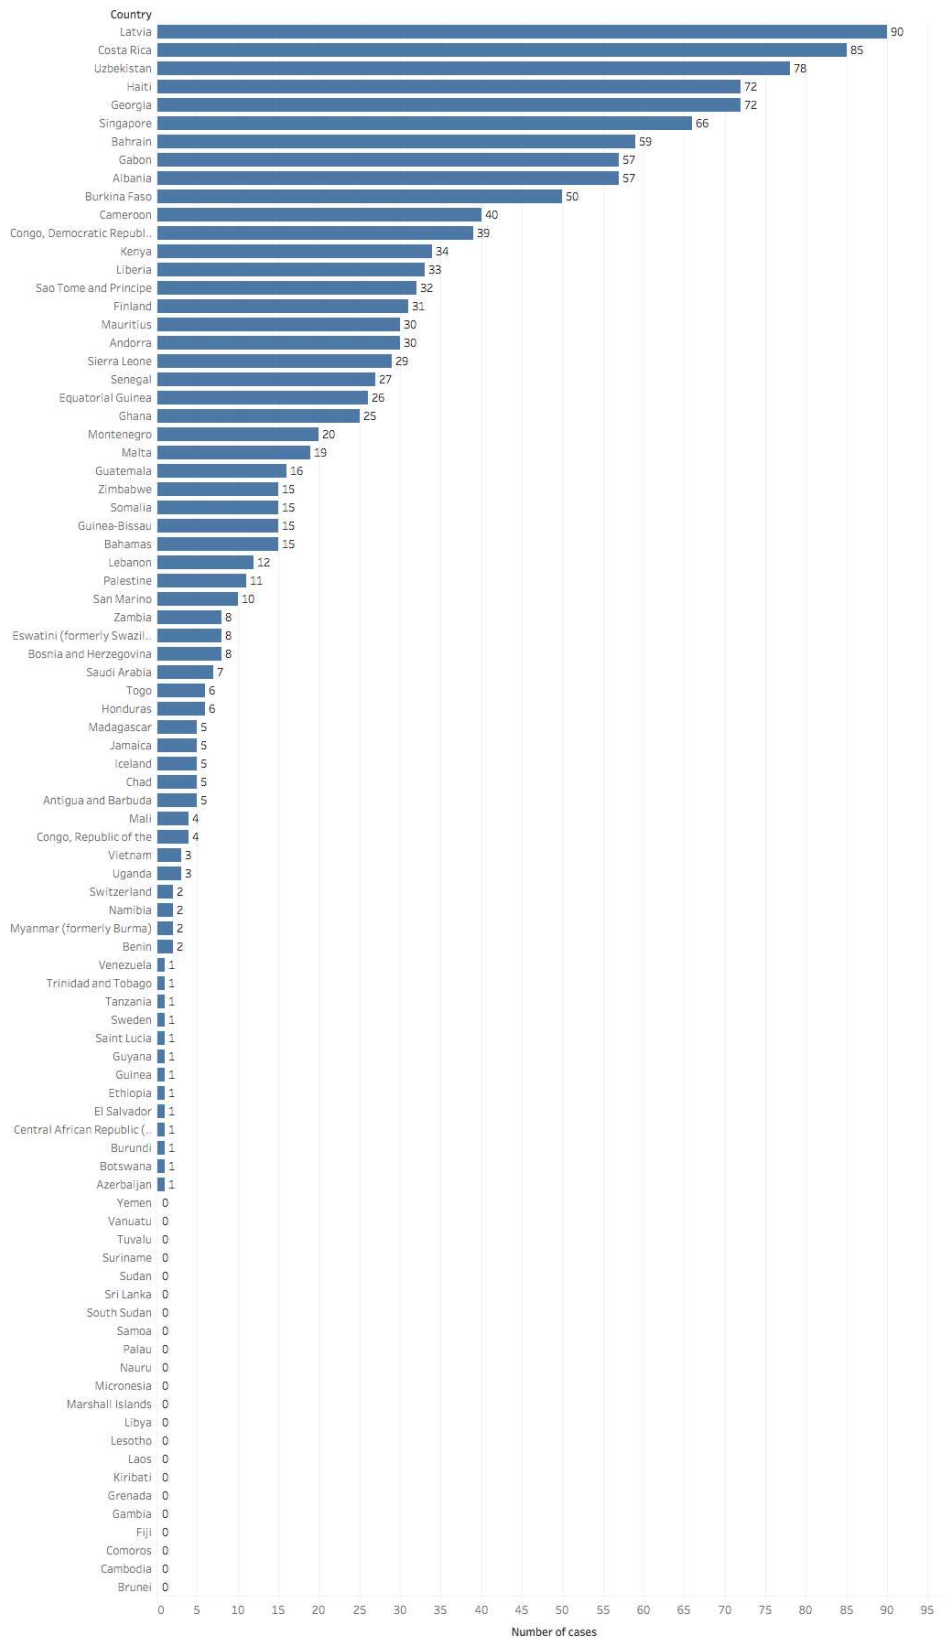

## Countries reporting at least 1 death

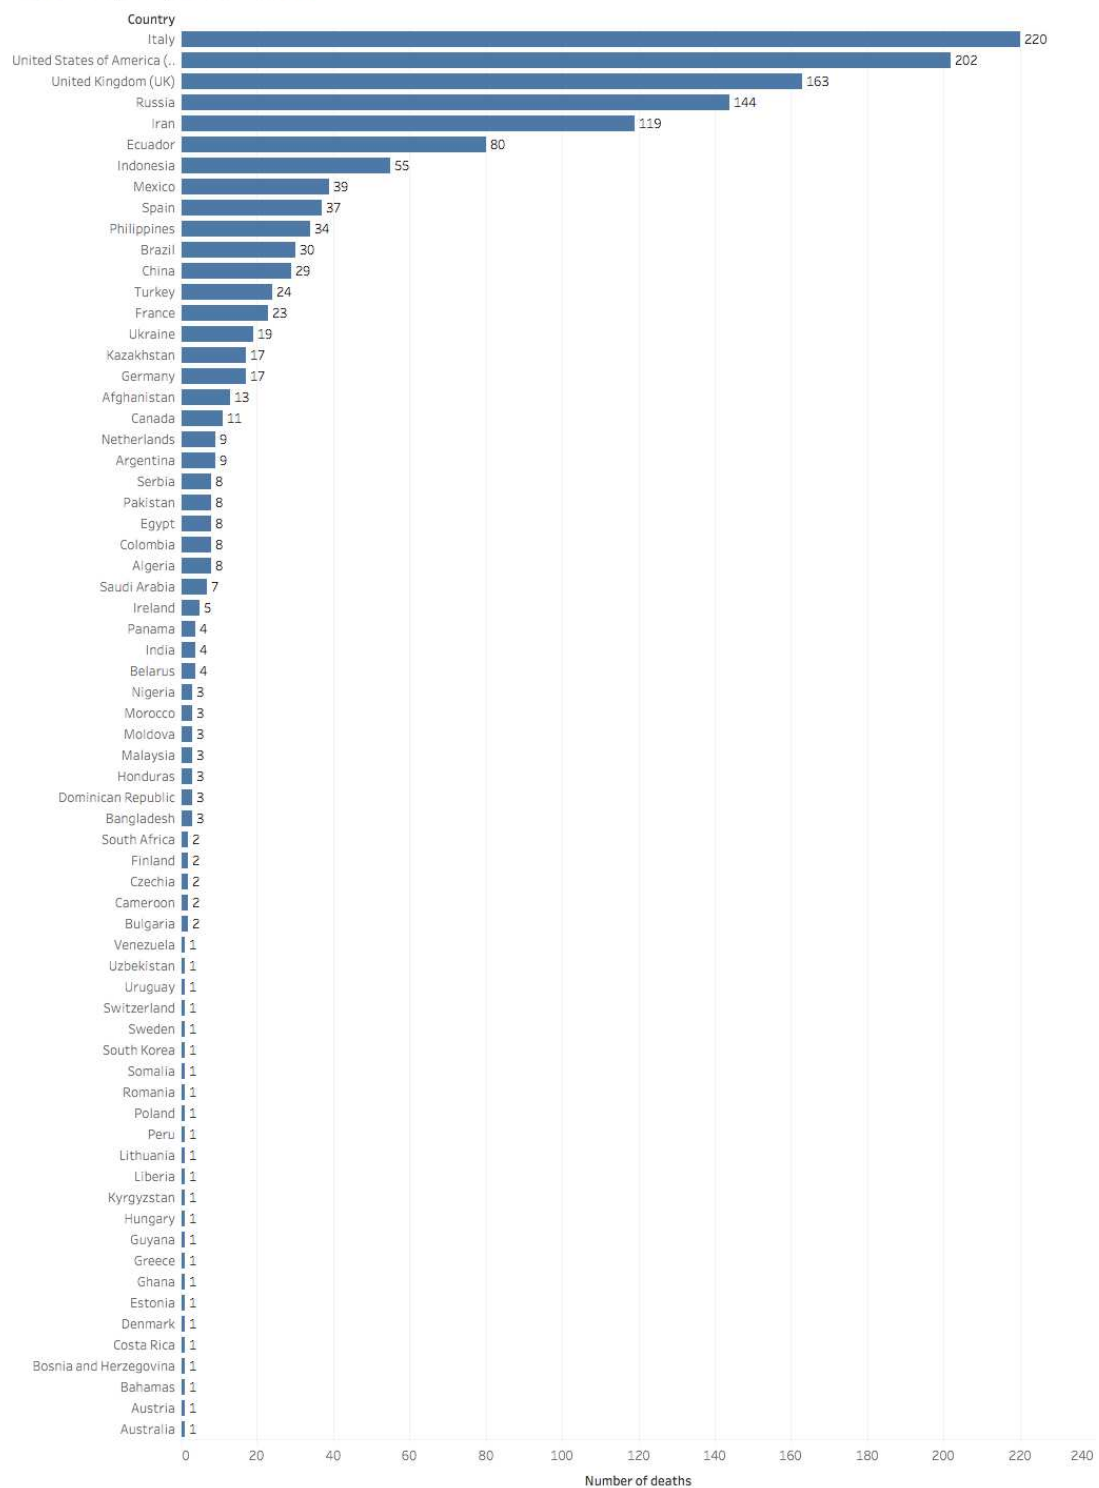

| Name of country                       | COVID-19 deaths among healthcare workers | COVID-19 cases among healthcare workers | CFR (Deaths as Percentage of total HCW infections) | Death as percentage of total population COVID deaths | References |
|---------------------------------------|------------------------------------------|-----------------------------------------|----------------------------------------------------|------------------------------------------------------|------------|
| <b>Afghanistan</b>                    | 13                                       | 346                                     | 3.8                                                | 12.3                                                 | (1–3)      |
| <b>Albania</b>                        | 0                                        | 57                                      | 0                                                  | 0                                                    | (1,4)      |
| <b>Algeria</b>                        | 8                                        | 200                                     | 4                                                  | 1.7                                                  | (1,5,6)    |
| <b>Andorra</b>                        | 0                                        | 30                                      | 0                                                  | 0                                                    | (1,7)      |
| <b>Angola</b>                         | Unreported                               |                                         |                                                    |                                                      |            |
| <b>Antigua and Barbuda</b>            | 0                                        | 5                                       | 0                                                  | 0                                                    | (1,8,9)    |
| <b>Argentina</b>                      | 9                                        | 764                                     | 1.2                                                | 3.3                                                  | (1,10)     |
| <b>Armenia</b>                        | 0                                        | 320                                     | 0                                                  | 0                                                    | (1,11)     |
| <b>Australia</b>                      | 1                                        | 481                                     | 0.2                                                | 1                                                    | (1,12,13)  |
| <b>Austria</b>                        | 1                                        | 891                                     | 0.1                                                | 0.2                                                  | (1,14,15)  |
| <b>Azerbaijan</b>                     | 0                                        | 1                                       | 0                                                  | 0                                                    | (1,16)     |
| <b>Bahamas</b>                        | 1                                        | 15                                      | 6.7                                                | 9.1                                                  | (1,17,18)  |
| <b>Bahrain</b>                        | 0                                        | 59                                      | 0                                                  | 0                                                    | (1,19)     |
| <b>Bangladesh</b>                     | 3                                        | 1172                                    | 0.3                                                | 1.5                                                  | (1,20,21)  |
| <b>Barbados</b>                       | Unreported                               |                                         |                                                    |                                                      |            |
| <b>Belarus</b>                        | 4                                        | Unreported                              | N/A                                                | 3.4                                                  | (1,22)     |
| <b>Belgium</b>                        | 0                                        | 170                                     | 0                                                  | 0                                                    | (1,23)     |
| <b>Belize</b>                         | Unreported                               |                                         |                                                    |                                                      |            |
| <b>Benin</b>                          | 0                                        | 2                                       | 0                                                  | 0                                                    | (1,24)     |
| <b>Bhutan</b>                         | Unreported                               |                                         |                                                    |                                                      |            |
| <b>Bolivia</b>                        | Unreported                               |                                         |                                                    |                                                      |            |
| <b>Bosnia and Herzegovina</b>         | 1                                        | 8                                       | 12.5                                               | 1.1                                                  | (1,25,26)  |
| <b>Botswana</b>                       | 0                                        | 1                                       | 0                                                  | 0                                                    | (1,27)     |
| <b>Brazil</b>                         | 30                                       | 552                                     | 5.4                                                | 0.3                                                  | (1,28)     |
| <b>Brunei</b>                         | Unreported                               |                                         |                                                    |                                                      |            |
| <b>Bulgaria</b>                       | 2                                        | 192                                     | 1                                                  | 2.4                                                  | (1,29)     |
| <b>Burkina Faso</b>                   | 0                                        | 50                                      | 0                                                  | 0                                                    | (1,30)     |
| <b>Burundi</b>                        | 0                                        | 1                                       | 0                                                  | 0                                                    | (1,24)     |
| <b>Cabo Verde</b>                     | Unreported                               |                                         |                                                    |                                                      |            |
| <b>Cambodia</b>                       | Unreported                               |                                         |                                                    |                                                      |            |
| <b>Cameroon</b>                       | 2                                        | 40                                      | 5                                                  | 1.9                                                  | (1,24,31)  |
| <b>Canada</b>                         | 11                                       | 274                                     | 4                                                  | 0.2                                                  | (1,22,32)  |
| <b>Central African Republic (CAR)</b> | 0                                        | 1                                       | 0                                                  | N/A                                                  | (1,24)     |

|                                          |            |       |     |      |              |
|------------------------------------------|------------|-------|-----|------|--------------|
| <b>Chad</b>                              | 0          | 5     | 0   | 0    | (1,24)       |
| <b>Chile</b>                             | 0          | 743   | 0   | 0    | (1,33)       |
| <b>China</b>                             | 29         | 3,387 | 0.9 | 0.6  | (1,34,35)    |
| <b>Colombia</b>                          | 8          | 560   | 1.4 | 2    | (1,36)       |
| <b>Comoros</b>                           | Unreported |       |     |      |              |
| <b>Congo, Democratic Republic of the</b> | 0          | 39    | 0   | 0    | (1,24)       |
| <b>Congo, Republic of the</b>            | 0          | 4     | 0   | 0    | (1,24)       |
| <b>Costa Rica</b>                        | 1          | 85    | 1.2 | 16.7 | (1,22,37)    |
| <b>Cote d'Ivoire</b>                     | Unreported | 85    |     |      | (1,24)       |
| <b>Croatia</b>                           | 0          | 274   | 0   | 0    | (1,38)       |
| <b>Cuba</b>                              | 0          | 92    | 0   | 0    | (1,39)       |
| <b>Cyprus</b>                            | 0          | 180   | 0   | 0    | (1,40)       |
| <b>Czechia</b>                           | 2          | 716   | 0.3 | 0.7  | (1,41–43)    |
| <b>Denmark</b>                           | 1          | 1022  | 0.1 | 0.2  | (1,41)       |
| <b>Djibouti</b>                          | Unreported |       |     |      |              |
| <b>Dominica</b>                          | Unreported |       |     |      |              |
| <b>Dominican Republic</b>                | 3          | 135   | 2.2 |      | (1,22,44–46) |
| <b>Ecuador</b>                           | 80         | 3416  | 2.3 | 4.8  | (1,47,48)    |
| <b>Egypt*</b>                            | 8          | 268   | 3   | 1.7  | (1,49,50)    |
| <b>El Salvador</b>                       | 0          | 1     | 0   | 0    | (1,51)       |
| <b>Equatorial Guinea</b>                 | 0          | 26    | 0   | 0    | (1,24)       |
| <b>Eritrea</b>                           | Unreported |       |     |      |              |
| <b>Estonia</b>                           | 1          | 128   | 0.8 | 1.8  | (1,52,53)    |
| <b>Eswatini (formerly Swaziland)</b>     | 0          | 8     | 0   | 0    | (1,24)       |
| <b>Ethiopia</b>                          | 0          | 1     | 0   | 0    | (1,54)       |
| <b>Fiji</b>                              | Unreported |       |     |      |              |
| <b>Finland</b>                           | 2          | 31    | 6.5 | 0.8  | (1,55–58)    |
| <b>France</b>                            | 23         | 6019  | 0.4 | 0.1  | (1,59,60)    |
| <b>Gabon</b>                             | 0          | 57    | 0   | 0    | (1,24)       |
| <b>Gambia</b>                            | Unreported |       |     |      |              |
| <b>Georgia</b>                           | 0          | 72    | 0   | 0    | (1,41)       |
| <b>Germany</b>                           | 17         | 10609 | 0.2 | 0.2  | (1,61)       |
| <b>Ghana</b>                             | 1          | 25    | 4   | 5.6  | (1,24)       |
| <b>Greece</b>                            | 0          | 170   | 0   | 0    | (1,41)       |

|                      |            |            |      |      |           |
|----------------------|------------|------------|------|------|-----------|
| <b>Grenada</b>       | Unreported |            |      |      |           |
| <b>Guatemala</b>     | 0          | 16         | 0    | 0    | (1,62)    |
| <b>Guinea</b>        | 0          | 1          | 0    | 0    | (1,63)    |
| <b>Guinea-Bissau</b> | 0          | 15         | 0    | 0    | (1,24)    |
| <b>Guyana</b>        | 1          | Unreported | N/A  | 10   | (1,64)    |
| <b>Haiti</b>         | 0          | 72         | 0    | 0    | (1,65)    |
| <b>Honduras</b>      | 3          | 6          | 50   | 3    | (1,66–68) |
| <b>Hungary</b>       | 1          | 335        | 0.3  | 0.3  | (1,22,69) |
| <b>Iceland</b>       | 0          | 5          | 0    | 0    | (1,70)    |
| <b>India</b>         | 4          | 548        | 0.5  | 0.2  | (1,71)    |
| <b>Indonesia</b>     | 55         | 174        | 31.6 | 5.9  | (1,72,73) |
| <b>Iran</b>          | 119        | 1369       | 8.7  | 1.8  | (1,74)    |
| <b>Iraq</b>          | Unreported |            |      |      |           |
| <b>Ireland</b>       | 5          | 6586       | 0.1  | 0.4  | (1,41,75) |
| <b>Israel</b>        | 0          | 294        | 0    | 0    | (1,41)    |
| <b>Italy</b>         | 220        | 23718      | 0.9  | 0.7  | (1,76,77) |
| <b>Jamaica</b>       | 0          | 5          | 0    | 0    | (1,62)    |
| <b>Japan</b>         | 0          | 513        | 0    | 0    | (1,78)    |
| <b>Jordan</b>        | Unreported |            |      |      |           |
| <b>Kazakhstan</b>    | 17         | 423        | 4    | 56.7 | (1,22,79) |
| <b>Kenya</b>         | 0          | 34         | 0    | 0    | (1,80)    |
| <b>Kiribati</b>      | Unreported |            |      |      |           |
| <b>Kuwait</b>        | 0          | 105        | 0    | 0    | (1,81)    |
| <b>Kyrgyzstan</b>    | 1          | 224        | 0.4  | 8.3  | (1,22,82) |
| <b>Laos</b>          | Unreported |            |      |      |           |
| <b>Latvia</b>        | 0          | 40         | 0    | 0    | (1,83)    |
| <b>Lebanon</b>       | 0          | 12         | 0    | 0    | (1,83)    |
| <b>Lesotho</b>       | Unreported |            |      |      |           |
| <b>Liberia</b>       | 1          | 33         | 3    | 5    | (1,24,84) |
| <b>Libya</b>         | Unreported |            |      |      |           |
| <b>Liechtenstein</b> | Unreported |            |      |      |           |
| <b>Lithuania</b>     | 1          | 236        | 0.4  | 2    | (1,85,86) |
| <b>Luxembourg</b>    | Unreported |            |      |      |           |
| <b>Madagascar</b>    | 0          | 5          | 0    | N/A  | (1,24)    |
| <b>Malawi</b>        | Unreported |            |      |      |           |
| <b>Malaysia</b>      | 3          | 325        | 0.9  | 2.8  | (1,87)    |
| <b>Maldives</b>      | Unreported |            |      |      |           |
| <b>Mali</b>          | 0          | 4          | 0    | 0    | (1,88)    |
| <b>Malta</b>         | 0          | 19         | 0    | 0    | (1,41)    |

|                                             |            |       |     |     |           |
|---------------------------------------------|------------|-------|-----|-----|-----------|
| <b>Marshall Islands</b>                     | Unreported |       |     |     |           |
| <b>Mauritania</b>                           | Unreported |       |     |     |           |
| <b>Mauritius</b>                            | 0          | 30    | 0   | 0   | (1,24)    |
| <b>Mexico*</b>                              | 39         | 3410  | 1.1 | 1.4 | (1,62)    |
| <b>Micronesia</b>                           | Unreported |       |     |     |           |
| <b>Moldova</b>                              | 5          | 1098  | 0.5 | 2.1 | (1,89,90) |
| <b>Monaco</b>                               | Unreported |       |     |     |           |
| <b>Mongolia</b>                             | Unreported |       |     |     |           |
| <b>Montenegro</b>                           | 0          | 25    | 0   | 0   | (1,91)    |
| <b>Morocco</b>                              | 3          | 0     | N/A | 1.6 | (1,92)    |
| <b>Mozambique</b>                           | Unreported |       |     |     |           |
| <b>Myanmar (formerly Burma)</b>             | 0          | 1     | 0   | 0   | (1,93)    |
| <b>Namibia</b>                              | 0          | 2     | 0   | N/A | (1,24)    |
| <b>Nauru</b>                                | Unreported |       |     |     |           |
| <b>Nepal</b>                                | Unreported |       |     |     |           |
| <b>Netherlands</b>                          | 9          | 13884 | 0.1 | 0.2 | (1,41)    |
| <b>New Zealand</b>                          | 0          | 155   | 0   | 0   | (1,94)    |
| <b>Nicaragua</b>                            | Unreported |       |     |     |           |
| <b>Niger</b>                                | 0          | 143   | 0   | 0   | (1,95)    |
| <b>Nigeria</b>                              | 3          | 113   | 2.7 | 2.9 | (1,96,97) |
| <b>North Korea</b>                          | Unreported |       |     |     |           |
| <b>North Macedonia (formerly Macedonia)</b> | Unreported |       |     |     |           |
| <b>Norway</b>                               | Unreported |       |     |     |           |
| <b>Oman</b>                                 | Unreported |       |     |     |           |
| <b>Pakistan</b>                             | 8          | 444   | 1.8 | 1.4 | (1,98)    |
| <b>Palau</b>                                | Unreported |       |     |     |           |
| <b>Palestine</b>                            | 0          | 11    | 0   | 0   | (1,99)    |
| <b>Panama</b>                               | 4          | 0     | N/A | 1.8 | -1,100    |
| <b>Papua New Guinea</b>                     | Unreported |       |     |     |           |
| <b>Paraguay</b>                             | Unreported |       |     |     |           |
| <b>Peru</b>                                 | 1          | 237   | 0.4 | 0.1 | (1,62)    |
| <b>Philippines</b>                          | 34         | 1934  | 1.8 | 5   | (1,101)   |
| <b>Poland</b>                               | 1          | 1600  | 0.1 | 0.1 | (1,102)   |
| <b>Portugal</b>                             | 0          | 2131  | 0   | 0   | (1,41)    |
| <b>Qatar</b>                                | Unreported |       |     |     |           |
| <b>Romania</b>                              | 1          | 2181  | 0   | 0.1 | (1,41)    |

|                                         |            |       |      |     |             |
|-----------------------------------------|------------|-------|------|-----|-------------|
| <b>Russia</b>                           | 144        | 2000  | 7.2  | 8.9 | (1,22,103)  |
| <b>Rwanda</b>                           | Unreported |       |      |     |             |
| <b>Saint Kitts and Nevis</b>            | Unreported |       |      |     |             |
| <b>Saint Lucia</b>                      | 0          | 1     | 0    | N/A | (1,62)      |
| <b>Saint Vincent and the Grenadines</b> | Unreported |       |      |     |             |
| <b>Samoa</b>                            | Unreported |       |      |     |             |
| <b>San Marino</b>                       | 0          | 10    | 0    | 0   | (1,104)     |
| <b>Sao Tome and Principe</b>            | 0          | 32    | 0    | 0   | (1,24)      |
| <b>Saudi Arabia</b>                     | 7          | 7     | 100  | 3.2 | (1,22)      |
| <b>Senegal</b>                          | 0          | 27    | 0    | 0   | (1,24)      |
| <b>Serbia</b>                           | 8          | 642   | 1.2  | 3.9 | (1,22,105)  |
| <b>Seychelles</b>                       | Unreported |       |      |     |             |
| <b>Sierra Leone</b>                     | 0          | 29    | 0    | 0   | (1,24)      |
| <b>Singapore</b>                        | 0          | 66    | 0    | 0   | (1,106)     |
| <b>Slovakia</b>                         | Unreported |       |      |     |             |
| <b>Slovenia</b>                         | 0          | 295   | 0    | 0   | (1,41)      |
| <b>Solomon Islands</b>                  | Unreported |       |      |     |             |
| <b>Somalia</b>                          | 1          | 6     | 16.7 | 2.3 | (1,107,108) |
| <b>South Africa</b>                     | 2          | 511   | 0.4  | 1.2 | (1,22,109)  |
| <b>South Korea</b>                      | 1          | 241   | 0.4  | 0.4 | (1,110,111) |
| <b>South Sudan</b>                      | Unreported |       |      |     |             |
| <b>Spain</b>                            | 37         | 30663 | 0.1  | 0.1 | (1,22,112)  |
| <b>Sri Lanka</b>                        | Unreported |       |      |     |             |
| <b>Sudan</b>                            | Unreported |       |      |     |             |
| <b>Suriname</b>                         | Unreported |       |      |     |             |
| <b>Sweden</b>                           | 1          | 0     | N/A  | 0   | (1,22)      |
| <b>Switzerland</b>                      | Unreported |       |      |     |             |
| <b>Syria</b>                            | Unreported |       |      |     |             |
| <b>Tajikistan</b>                       | 0          | 136   | 0    | 0   | (1,113)     |
| <b>Tanzania</b>                         | 0          | 1     | 0    | 0   | (1,24)      |
| <b>Thailand</b>                         | 0          | 103   | 0    | 0   | (1,114)     |
| <b>Timor-Leste</b>                      | Unreported |       |      |     |             |
| <b>Togo</b>                             | 0          | 6     | 0    | 0   | (1,24)      |
| <b>Tonga</b>                            | Unreported |       |      |     |             |
| <b>Trinidad and Tobago</b>              | 0          | 1     | 0    | 0   | (1,62)      |
| <b>Tunisia</b>                          | 0          | 143   | 0    | 0   | (1,115)     |



|                                   |            |      |     |     |             |
|-----------------------------------|------------|------|-----|-----|-------------|
| <b>Turkey</b>                     | 24         | 7428 | 0.3 | 0.7 | (1,116)     |
| <b>Turkmenistan</b>               | Unreported |      |     |     |             |
| <b>Tuvalu</b>                     | Unreported |      |     |     |             |
| <b>Uganda</b>                     | 0          | 3    | 0   | N/A | (1,24)      |
| <b>Ukraine</b>                    | 19         | 2660 | 0.7 | 5.6 | (1,117)     |
| <b>United Arab Emirates (UAE)</b> | Unreported |      |     |     |             |
| <b>United Kingdom (UK)</b>        | 163        | 2067 | 7.9 | 0.5 | (1,118,119) |
| <b>United States</b>              | 202        | 9282 | 2.2 | 0.3 | (1,22,120)  |
| <b>Uruguay</b>                    | 1          | 100  | 1   | 5.9 | (1,121)     |
| <b>Uzbekistan</b>                 | 0          | 78   | 0   | 0   | (1,122)     |
| <b>Vanuatu</b>                    | Unreported |      |     |     |             |
| <b>Vatican City (Holy See)</b>    | Unreported |      |     |     |             |
| <b>Venezuela</b>                  | 1          | 0    | N/A | 10  | (1,22)      |
| <b>Vietnam</b>                    | 0          | 3    | 0   | N/A | (1,123)     |
| <b>Yemen</b>                      | Unreported |      |     |     |             |
| <b>Zambia</b>                     | 0          | 15   | 0   | 0   | (1,24)      |
| <b>Zimbabwe</b>                   | 0          | 1    | 0   | 0   | (1,24)      |

\*Internal reports from government sources that have yet to be published utilised

## References

- 1 Worldometer. Coronavirus Cases. Worldometer. 2020;1–22.
- 2 ReliefWeb. Afghanistan: COVID-19 Multi-Sectoral Response Operational Situation Report, 6 May 2020 - Afghanistan [Internet]. [Cited 2020 May 8]. Available from: <https://reliefweb.int/report/afghanistan/afghanistan-covid-19-multi-sectoral-response-operational-situation-report-6-may>
- 3 Reuters. Exclusive: Large number of COVID-19 cases among Afghan medics spark alarm in Kabul [Internet]. [Cited 2020 May 8]. Available from: <https://uk.reuters.com/article/uk-health-coronavirus-afghanistan-hospit/exclusive-large-number-of-covid-19-cases-among-afghan-medics-spark-alarm-in-kabul-idUKKBN22J2PW>
- 4 UN Women – Headquarters. “Nurses are the real heroes,” says Albanian doctor in the front line of COVID-19 response [Internet]. [Cited 2020 May 8]. Available from: <https://www.unwomen.org/en/news/stories/2020/4/feature-nurses-in-albania-on-front-line-of-covid-19-response>
- 5 Algeria confirms 8th death from coronavirus [Internet]. [Cited 2020 May 8]. Available from: <https://www.aa.com.tr/en/latest-on-coronavirus-outbreak/algeria-confirms-8th-death-from-coronavirus/1771778>
- 6 Health. KUNA : Algeria confirms 18 deaths from coronavirus, 200 cases among health workers [Internet]. [Cited 2020 May 8]. Available from: <https://www.kuna.net.kw/ArticleDetails.aspx?id=2886827&language=en>

- 7 La defunció d'una dona de 73 anys eleva les víctimes de coronavirus al país fins a 47 [Internet]. [Cited 2020 May 8]. Available from: [https://www.diariandorra.ad/noticies/nacional/2020/05/08/la\\_defuncio\\_una\\_dona\\_anys\\_eleva\\_les\\_victimes\\_coronavirus\\_pais\\_fins\\_74\\_160729\\_1125.html](https://www.diariandorra.ad/noticies/nacional/2020/05/08/la_defuncio_una_dona_anys_eleva_les_victimes_coronavirus_pais_fins_74_160729_1125.html)
- 8 A State of Emergency in Antigua and Barbuda | Caribbean Press Release [Internet]. [Cited 2020 May 8]. Available from: <https://cpressrelease.com/a-state-of-emergency-in-antigua-and-barbuda/>
- 9 Government of Antigua and Barbuda [Internet]. [Cited 2020 May 8]. Available from: <https://ab.gov.ag/>
- 10 Clarín. Coronavirus en Argentina: ya murieron 9 profesionales de la salud y se infectaron 764 [Internet]. [Cited 2020 May 8]. Available from: [https://www.clarin.com/sociedad/coronavirus-argentina-murieron-9-profesionales-salud\\_0\\_v6nQK\\_fNF.html](https://www.clarin.com/sociedad/coronavirus-argentina-murieron-9-profesionales-salud_0_v6nQK_fNF.html)
- 11 Public Radio of Armenia. 320 health workers have contracted Covid-19 in Armenia [Internet]. [Cited 2020 May 8]. Available from: <https://en.armradio.am/2020/05/03/320-health-workers-have-contracted-covid-19-in-armenia/>
- 12 Australia's coronavirus victims: Covid-19 related deaths across the country [Internet]. [Cited 2020 May 8]. Available from: <https://www.theguardian.com/australia-news/2020/apr/21/australia-coronavirus-victims-age-names-deaths-covid-19-australian-death-toll>
- 13 ABC News. Australian healthcare workers riding the coronavirus curve are relieved as infections dwindle [Internet]. [Cited 2020 May 8]. Available from: <https://www.abc.net.au/news/2020-05-04/coronavirus-frontline-health-workers/12198348>
- 14 Profil. Medizinisches Personal: 891 mit Corona infiziert [Internet]. [Cited 2020 May 8]. Available from: <https://www.profil.at/oesterreich/medizinisches-personal-891-mit-corona-infiziert/400885910>
- 15 Schwechat. Coronavirus: Humberger Arzt nach Infektion verstorben [Internet]. [Cited 2020 May 8]. Available from: [https://www.meinbezirk.at/schwechat/c-gesundheit/humberger-arzt-nach-infektion-verstorben\\_a4023873](https://www.meinbezirk.at/schwechat/c-gesundheit/humberger-arzt-nach-infektion-verstorben_a4023873)
- 16 A medical worker infected with coronavirus in Azerbaijan [Internet]. [Cited 2020 May 8]. Available from: <https://ona.az/en/social/one-medical-worker-infected-with-coronavirus-in-azerbaijan-official-13629>
- 17 The Government of the Bahamas [Internet]. [Cited 2020 May 8]. Available from: [https://www.bahamas.gov.bs/wps/portal/public/gov/government!/ut/p/b1/04\\_Sj9CPykyssy0xPLMnMz0vMAfGjzOKNDdx9HR1NLHzdTQ3MDDxDA3wcA8w9jPy9jYAKIoEKDHAARwNC-sP1o\\_AqMTGAKsBjhZ9Hfm6qfkFuhEGWiaMiALGJzU0!/dl4/d5/L2dBISEvZ0FBIS9nQS E h/](https://www.bahamas.gov.bs/wps/portal/public/gov/government!/ut/p/b1/04_Sj9CPykyssy0xPLMnMz0vMAfGjzOKNDdx9HR1NLHzdTQ3MDDxDA3wcA8w9jPy9jYAKIoEKDHAARwNC-sP1o_AqMTGAKsBjhZ9Hfm6qfkFuhEGWiaMiALGJzU0!/dl4/d5/L2dBISEvZ0FBIS9nQS E h/)
- 18 Magnetic Media. Two More COVID-19 Deaths in The Bahamas; 15 Healthcare workers infected [Internet]. [Cited 2020 May 8]. Available from: <https://magneticmediatv.com/2020/04/two-more-covid-19-deaths-in-the-bahamas-15-healthcare-workers-infected/>
- 19 Xinhua. 59 healthcare workers in Bahrain infected with COVID-19 [Internet]. [Cited 2020 May 8]. Available from: [http://www.xinhuanet.com/english/2020-05/07/c\\_139038291.htm](http://www.xinhuanet.com/english/2020-05/07/c_139038291.htm)
- 20 **নীড় পাতা** [Internet]. [Cited 2020 May 8]. Available from: <https://www.dghs.gov.bd/index.php/bd/>
- 21 Bangladesh: 11% COVID-19 cases among health workers [Internet]. [Cited 2020 May 8]. Available from: <https://www.aa.com.tr/en/asia-pacific/bangladesh-11-covid-19-cases-among-health-workers/1826014>

- 22 In Memoriam: Healthcare Workers Who Have Died of COVID-19 [Internet]. [cited 2020 May 8]. Available from: <https://www.medscape.com/viewarticle/927976> (19/04/2020) %0A
- 23 Covid-19 cases and deaths bounce back in Belgium [Internet]. [Cited 2020 May 8]. Available from: <https://www.plenglish.com/index.php?o=rn&id=53781&SEO=covid-19-cases-and-deaths-bounce-back-in-belgium>
- 24 Situation update for the WHO African Region 5 May 2020 [Internet]. [Cited 2020 May 8]. Available from: [https://apps.who.int/iris/bitstream/handle/10665/331989/SITREP\\_COVID-19\\_WHOAFRO\\_20200506-eng.pdf](https://apps.who.int/iris/bitstream/handle/10665/331989/SITREP_COVID-19_WHOAFRO_20200506-eng.pdf)
- 25 COVID-19 UPDATES: Bosnian doctors start getting sick with Covid-19 [Internet]. [cited 2020 May 8]. Available from: <http://ba.n1info.com/English/NEWS/a421350/COVID-19-UPDATES-More-than-450-confirmed-cases-in-Bosnia.html>
- 26 COVID-19 claims first doctor in southern Bosnia [Internet]. [cited 2020 May 8]. Available from: <http://ba.n1info.com/English/NEWS/a426731/COVID-19-claims-first-doctor-in-southern-Bosnia.html%0A>
- 27 Voice of America. Entire Botswana Parliament Under Quarantine After Health Care Worker Test Positive for COVID-19 [Internet]. [cited 2020 May 8]. Available from: <https://www.voanews.com/science-health/coronavirus-outbreak/entire-botswana-parliament-under-quarantine-after-health-care>
- 28 G1. Casos de coronavírus e número de mortes no Brasil em 17 de abril [Internet]. [Cited 2020 May 8]. Available from: <https://g1.globo.com/bemestar/coronavirus/noticia/2020/04/17/casos-de-coronavirus-e-numero-de-mortes-no-brasil-em-17-de-abril.ghtml>
- 29 Covid-19 in Bulgaria: Day 61 [Internet]. [Cited 2020 May 8]. Available from: <https://bnr.bg/en/post/101272049/covid-19-in-bulgaria-day-61>
- 30 ABC News. Burkina Faso struggles against COVID-19 and extremist threat [Internet]. [Cited 2020 May 8]. Available from: <https://abcnews.go.com/International/wireStory/burkina-faso-struggles-covid-19-extremist-threat-70344982>
- 31 Cameroun-Coronavirus : un médecin dans un état préoccupant [Internet]. [Cited 2020 May 8]. Available from: <https://www.journalducameroun.com/cameroun-un-medecin-meurt-des-suites-du-coronavirus/>
- 32 The Globe and Mail. Infected health-care workers the source of coronavirus outbreaks at four Ontario hospitals [Internet]. [Cited 2020 May 8]. Available from: <https://www.theglobeandmail.com/canada/article-infected-health-care-workers-the-source-of-coronavirus-outbreaks-at/>
- 33 Chinadaily.com.cn. Latin America sees continued rise in COVID-19 cases as Argentina takes stricter measures [Internet]. [Cited 2020 May 8]. Available from: <http://www.chinadaily.com.cn/a/202004/16/WS5e97fdf2a3105d50a3d16b42.html>
- 34 Los Angeles Times. Health workers fighting coronavirus in China die of infection, fatigue [Internet]. [Cited 2020 May 8]. Available from: <https://www.latimes.com/world-nation/story/2020-02-25/doctors-fighting-coronavirus-in-china-die-of-both-infection-and-fatigue>
- 35 Report of the WHO-China Joint Mission on Coronavirus Disease 2019 (COVID-19).
- 36 At least 8 health workers killed, 560 infected by coronavirus in Colombia [Internet]. [Cited 2020 May 8]. Available from: <https://colombiareports.com/at-least-8-health-workers-killed-560-infected-by-coronavirus-in-colombia/>
- 37 Wikipedia. COVID-19 pandemic in Costa Rica [Internet]. Available from: [https://en.wikipedia.org/wiki/COVID-19\\_pandemic\\_in\\_Costa\\_Rica](https://en.wikipedia.org/wiki/COVID-19_pandemic_in_Costa_Rica)

- 38 Wikipedia. COVID-19 pandemic in Croatia [Internet]. [Cited 2020 May 8]. Available from: [https://en.wikipedia.org/wiki/COVID-19\\_pandemic\\_in\\_Croatia](https://en.wikipedia.org/wiki/COVID-19_pandemic_in_Croatia)
- 39 Xinhua. Nearly 100 Cuban health workers test positive for COVID-19 [Internet]. [Cited 2020 May 8]. Available from: [http://www.xinhuanet.com/english/2020-04/18/c\\_138988157.htm](http://www.xinhuanet.com/english/2020-04/18/c_138988157.htm)
- 40 Epidemiological Surveillance Unit of the Ministry of Health. National Surveillance Report as of 28/04/2020 [Internet]. [Cited 2020 May 8]. Available from: <https://www.pio.gov.cy/coronavirus/en/pdf/i28042020en.pdf>
- 41 CPME. National updates [Internet]. [Cited 2020 May 8]. Available from: <https://www.cpme.eu/covid-19-section/national-updates/>
- 42 Vláda ČR. Informace ke koronaviru SARS-CoV-2 [Internet]. [Cited 2020 May 8]. Available from: <https://www.vlada.cz/cz/media-centrum/aktualne/aktualni-informace-ke-koronaviru-2019-ncov-179250/>
- 43 Prague nurse infected with COVID-19 dies - Prague, Czech Republic [Internet]. [Cited 2020 May 8]. Available from: <https://news.expats.cz/coronavirus-in-the-czech-republic/prague-nurse-infected-with-covid-19-dies/>
- 44 CNN. Enfermeras dominicanas protestan por falta de insumos [Internet]. [Cited 2020 May 8]. Available from: <https://cnnespanol.cnn.com/2020/04/23/alerta-republica-dominicana-5-543-infectados-por-covid-19-y-enfermeras-protestan-por-falta-de-insumos-de-proteccion-personal/>
- 45 CDN. Revelan hay tres médicos dominicanos confirmados por coronavirus [Internet]. [Cited 2020 May 8]. Available from: <https://cdn.com.do/2020/03/17/revelan-hay-tres-medicos-dominicanos-confirmados-por-coronavirus/#>
- 46 Hoy Digital. Colegio Médico responde al ministro; muestra lista 59 médicos infectados por coronavirus [Internet]. [Cited 2020 May 8]. Available from: <https://hoy.com.do/colegio-medico-responde-al-ministro-muestra-evidencia-59-medicos-infectados-por-coronavirus/>
- 47 NODAL. Ecuador: 80 profesionales de la salud fallecidos por Covid-19 en Guayas [Internet]. [Cited 2020 May 8]. Available from: <https://www.nodal.am/2020/04/colapso-sanitario-en-ecuador-guayas-registra-80-profesionales-de-la-salud-fallecidos-por-covid-19/>
- 48 Tableau Public. COVID19ecu\_MSP - Publicaciones DNEAIS MSP [Internet]. [Cited 2020 May 8]. Available from: [https://public.tableau.com/profile/publicaciones.dneais.msp#!/vizhome/COVID19ecu\\_MSP\\_15866333883550/COVID-19MSP](https://public.tableau.com/profile/publicaciones.dneais.msp#!/vizhome/COVID19ecu_MSP_15866333883550/COVID-19MSP)
- 49 Eighth doctor dies from coronavirus in Egypt: Medical Syndicate [Internet]. [Cited 2020 May 8]. Available from: <http://english.ahram.org.eg/NewsContent/1/64/368590/Egypt/Politics-/Eighth-doctor-dies-from-coronavirus-in-Egypt-Medic.aspx%0A>
- 50 Middle East Monitor. WHO: 100% of Egypt's COVID-19 deaths had underlying health conditions [Internet]. [Cited 2020 May 8]. Available from: <https://www.middleeastmonitor.com/20200414-who-100-of-egypts-covid-19-deaths-had-underlying-health-conditions/>
- 51 Noticias de El Salvador. Personal de cuatro hospitales se infecta con el nuevo virus [Internet]. [Cited 2020 May 8]. Available from: <https://www.elsalvador.com/eldiariodehoy/coronavirus-personal-medico-cuatro-hospitales-infectados-virus/705707/2020/>
- 52 Over 100 health care workers in Estonia have contracted coronavirus [Internet]. [Cited 2020 May 8]. Available from:

[https://www.baltictimes.com/over\\_100\\_health\\_care\\_workers\\_in\\_estonia\\_have\\_contracted\\_coronavirus/](https://www.baltictimes.com/over_100_health_care_workers_in_estonia_have_contracted_coronavirus/)

53 MAY BLOG: Coronavirus in Estonia [Internet]. [Cited 2020 May 8]. Available from: <https://estonianworld.com/life/blog-coronavirus-in-estonia/>

54 Kalamata Koronaios: A doctor tested positive for the virus [Internet]. [cited 2020 May 8]. Available from: <https://www.alphafreepress.gr/2020/03/17/ellada/kalamata-koronaios-giatros-vrethike-thetikos-ston-io/%0A>

55 Yle Uutiset. Helsinki heart surgeon tests positive for coronavirus, 30 hospital workers now quarantined [Internet]. [Cited 2020 May 8]. Available from: [https://yle.fi/uutiset/osasto/news/helsinki\\_heart\\_surgeon\\_tests\\_positive\\_for\\_coronavirus\\_30\\_hospital\\_workers\\_now\\_quarantined/11253410](https://yle.fi/uutiset/osasto/news/helsinki_heart_surgeon_tests_positive_for_coronavirus_30_hospital_workers_now_quarantined/11253410)

56 MTVuutiset.fi. Savon Sanomat: Juha M. Venäläinen kuoli koronavirukseen - toimi pitkään mäkimaajoukkueen lääkärinä [Internet]. [Cited 2020 May 8]. Available from: <https://www.mtvuutiset.fi/artikkeli/savon-sanomat-makimaajoukkueen-pitkaaikainen-laakari-juha-m-venalainen-kuoli-koronavirukseen/7779850>

57 Mediuutiset. Mieslääkärien kuolleisuus koronavirukseen on huolestuttavan suuri [Internet]. [Cited 2020 May 8]. Available from: <https://www.medi uutiset.fi/uutiset/laakarilehti-suomessa-kuollut-ainakin-kaksi-tyoikaistamieslaakaria-koronavirusinfektioon-miessukupuoli-on-itsenainen-riskitekija-vakavalle-koronavirusinfektioille/e680b67f-cfb7-48f8-b8e1-c33074a74c01>

58 Forssan Lehti. Uuden lastensairaalan lasten syöpä- ja elinsiirto-osaston hoitajalla koronatartunta – Yhteensä 24 työntekijää on asetettu karanteeniin [Internet]. [Cited 2020 May 8]. Available from: <https://www.forssanlehti.fi/uutiset/uuden-lastensairaalan-lastensyopa-ja-elinsiirto-osaston-hoitajalla-koronatartunta-yhteensa-24-tyontekijaa-on-asetettu-karanteeniin-2-587481>

59 Coronavirus : Parmi les victimes du Covid-19 en France, les professionnels de santé paient un lourd tribut [Internet]. [Cited 2020 May 8]. Available from: <https://www.20minutes.fr/sante/2758699-20200410-coronavirus-parmi-victimes-covid-19-france-professionnels-sante-paient-lourd-tribu>

60 COVID-19 : point épidémiologique du 23 avril 2020 [Internet]. [Cited 2020 May 8]. Available from: <https://www.santepubliquefrance.fr/maladies-et-traumatismes/maladies-et-infections-respiratoires/infection-a-coronavirus/documents/bulletin-national/covid-19-point-epidemiologique-du-23-avril-2020>

61 Coronavirus Disease 2019 (COVID-19) Daily Situation Report of the Robert Koch Institute [Internet]. [Cited 2020 May 8]. Available from: [https://www.rki.de/DE/Content/InfAZ/N/Neuartiges\\_Coronavirus/Situationsberichte/2020-05-07-en.pdf?\\_\\_blob=publicationFile](https://www.rki.de/DE/Content/InfAZ/N/Neuartiges_Coronavirus/Situationsberichte/2020-05-07-en.pdf?__blob=publicationFile)

62 Epidemic Diseases - COVID-19 Epidemiological Dashboard, Region of the Americas, Pan American Health Organization (PAHO) [Internet]. [Cited 2020 May 8]. Available from: <https://ais.paho.org/phis/viz/COVID-19EpiDashboard.asp>

63 Apanews.net. Guinea's Covid-19 coordinator tests positive [Internet]. [Cited 2020 May 8]. Available from: <https://apanews.net/en/news/guineas-covid-19-coordinator-tests-positive>

64 Kaieteur News. Former paramedic succumbs to COVID-19 – confirmed cases jump to 12 [Internet]. [Cited 2020 May 8]. Available from: <https://www.kaieteurnews.com/2020/04/01/emergency-medical-technician-succumbs-to-covid-19-guyanas-confirmed-cases-jump-to-12/>

65 Surveillance de la COVID-19, Haiti, 2020 [Internet]. [cited 2020 May 8]. Available from: <https://covid19haiti.com/%0A>

- 66 Diez - Diario Deportivo. Coronavirus: Muere doctora en Honduras, infectada de COVID-19 y es la víctima 10 [Internet]. [Cited 2020 May 8]. Available from: <https://www.diez.hn/coronavirus/1368853-441/muere-doctora-honduras-coronavirus-hospital-leonardo-martinez-covid19>
- 67 Diez - Diario Deportivo. Muere por coronavirus enfermera en el hospital Catarino Rivas de San Pedro Sula [Internet]. [Cited 2020 May 8]. Available from: <https://www.diez.hn/coronavirus/1374117-441/muere-enfermera-coronavirus-hospital-catarino-rivas-san-pedro-sula-honduras>
- 68 Diez - Diario Deportivo. Un médico y una enfermera entre los infectados por coronavirus en Honduras [Internet]. [Cited 2020 May 8]. Available from: <https://www.diez.hn/coronavirus/1367860-441/medico-enfermera-infectados-coronavirus-covid-19-honduras>
- 69 Hungary Today. Coronavirus: More and More Healthcare Workers Test Positive, but Percentage Rate EU Average, says Chief Medical Officer [Internet]. [Cited 2020 May 8]. Available from: <https://hungarytoday.hu/coronavirus-more-and-more-healthcare-workers-test-positive-but-percentage-rate-eu-average-says-chief-medical-officer/>
- 70 Iceland Monitor. Five Critical Care Nurses Infected with COVID-19 [Internet]. [Cited 2020 May 8]. Available from: [https://icelandmonitor.mbl.is/news/news/2020/03/09/five\\_critical\\_care\\_nurses\\_infected\\_with\\_covid\\_19/](https://icelandmonitor.mbl.is/news/news/2020/03/09/five_critical_care_nurses_infected_with_covid_19/)
- 71 548 doctors, nurses, paramedics infected with Covid-19 across India: Report [Internet]. [cited 2020 May 8]. Available from: <https://www.hindustantimes.com/india-news/548-docs-nurses-paramedics-infected-with-covid-19-across-india-report/story-o2pM3w2adM4g3PXI6TBlkN.html>
- 72 Ambon hospital suspends operations after 25 medical workers test positive for COVID-19 [Internet]. [cited 2020 May 12]. Available from: <https://www.thejakartapost.com/news/2020/05/12/ambon-hospital-suspends-operations-after-25-medical-workers-test-positive-for-covid-19.html>
- 73 Indonesia: 55 Medical Workers Have Died from COVID-19 [Internet]. [Cited 2020 May 8]. Available from: <https://www.benarnews.org/english/news/indonesian/medical-deaths-05062020171400.html>
- 74 Iran News Wire on Twitter. Iran News Wire on Twitter [Internet]. [Cited 2020 May 8]. Available from: <https://twitter.com/IranNW/status/1251939828934905857>
- 75 Epidemiology of COVID-19 in Ireland [Internet]. [cited 2020 May 8]. Available from: <https://www.hpsc.ie/a-z/respiratory/coronavirus/novelcoronavirus/casesinireland/epidemiologyofcovid-19inireland/may2020/>
- 76 Epidemia COVID-19.
- 77 Sorveglianza Integrata COVID-19 in Italia [Internet]. [cited 2020 May 8]. Available from: [https://www.epicentro.iss.it/coronavirus/bollettino/Infografica\\_6maggio\\_ITA.pdf](https://www.epicentro.iss.it/coronavirus/bollettino/Infografica_6maggio_ITA.pdf)
- 78 NHK WORLD-JAPAN. Coronavirus spreads through hospitals in Japan [Internet]. [Cited 2020 May 8]. Available from: <https://www3.nhk.or.jp/nhkworld/en/news/backstories/1055/>
- 79 World Socialist Web Site. Kazakhstan: Hospital workers demand resignation of government official over spread of COVID-19 [Internet]. [cited 2020 May 8]. Available from: <https://www.wsws.org/en/articles/2020/04/22/kaza-a22.html>
- 80 CGTN Africa. Kenya reports decline in daily COVID-19 infections, but number of infected health workers hits 34 [Internet]. [Cited 2020 May 8]. Available from: <https://africa.cgtn.com/2020/05/08/kenya-reports-decline-daily-covid-19-infections-but-number-of-infected-health-workers-hits-34/>

- 81 الصحة: « 105 حالات إصابة بـ«كورونا».. بين الطواقم الطبية» [Internet]. [Cited 2020 May 8]. Available from: <https://alqabas.com/article/5770510--حالات-إصابة-بكورونا-من-الطواقم-الطبية?id=5770510>
- 82 Three more medical workers contract COVID-19 in Kyrgyzstan [Internet]. [Cited 2020 May 8]. Available from: [https://24.kg/english/152109\\_Three\\_more\\_medical\\_workers\\_contract\\_COVID-19\\_in\\_Kyrgyzstan/](https://24.kg/english/152109_Three_more_medical_workers_contract_COVID-19_in_Kyrgyzstan/)
- 83 Table 1. Global burden of COVID-19 pandemic on healthcare workers [Internet]. [Cited 2020 May 8]. Available from: [https://figshare.com/articles/Table\\_1\\_Global\\_burden\\_of\\_COVID-19\\_pandemic\\_on\\_healthcare\\_workers/12148518/1](https://figshare.com/articles/Table_1_Global_burden_of_COVID-19_pandemic_on_healthcare_workers/12148518/1)
- 84 allAfrica.com. Liberia: He Survived Ebola but Not Corona, First Health Worker Succumbs to COVID-19 [Internet]. [Cited 2020 May 8]. Available from: <https://allafrica.com/stories/202004200344.html>
- 85 LRT. Coronavirus: 771 confirmed cases in Lithuania, 83-year-old doctor the latest victim [Internet]. [Cited 2020 May 8]. Available from: <https://www.lrt.lt/en/news-in-english/19/1160113/coronavirus-771-confirmed-cases-in-lithuania-83-year-old-doctor-the-latest-victim>
- 86 LRT. Coronavirus: Lithuania confirms 2 deaths, 4 new infections [Internet]. [Cited 2020 May 8]. Available from: <https://www.lrt.lt/en/news-in-english/19/1175160/coronavirus-lithuania-confirms-2-deaths-4-new-infections>
- 87 325 medical workers test positive for Covid-19 [Internet]. [Cited 2020 May 8]. Available from: <https://www.nst.com.my/news/nation/2020/04/586972/325-medical-workers-test-positive-covid-19>
- 88 Coronavirus: Four health workers test positive for coronavirus in Mali [Internet]. [Cited 2020 May 8]. Available from: [https://www.panapress.com/Coronavirus-Four-health-workers--a\\_630636881-lang2.html](https://www.panapress.com/Coronavirus-Four-health-workers--a_630636881-lang2.html)
- 89 IPN. COVID-19 claims two more lives [Internet]. [Cited 2020 May 8]. Available from: [https://www.ipn.md/en/covid-19-claims-two-more-lives-7967\\_1073351.html](https://www.ipn.md/en/covid-19-claims-two-more-lives-7967_1073351.html)
- 90 AICI SUNT ȘTIRILE. Two out of ten coronavirus-infected patients are medical workers [Internet]. [Cited 2020 May 8]. Available from: [https://en.publika.md/two-out-of-ten-coronavirus-infected-patients-are-medical-workers-\\_2661500.html](https://en.publika.md/two-out-of-ten-coronavirus-infected-patients-are-medical-workers-_2661500.html)
- 91 Standard. Radojević: Plavljanin umro usled infarkta, trenutno 34 osobe hospitalizovane [Internet]. [Cited 2020 May 8]. Available from: <https://www.standard.co.me/drustvo/uzivo-konferencija-nkt-nove-informacije-o-virusu-covid-19-2/>
- 92 Morocco Mourns 3 Doctors Who Died Fighting COVID-19 [Internet]. [Cited 2020 May 8]. Available from: <https://www.morocoworldnews.com/2020/04/298683/morocco-mourns-3-doctors-who-died-fighting-covid-19/>
- 93 Wikipedia. COVID-19 pandemic in Myanmar [Internet]. [Cited 2020 May 8]. Available from: [https://en.wikipedia.org/wiki/COVID-19\\_pandemic\\_in\\_Myanmar](https://en.wikipedia.org/wiki/COVID-19_pandemic_in_Myanmar)
- 94 Stuff.co.nz. Coronavirus: Healthcare workers make up 1 in 10 of New Zealand's Covid-19 cases [Internet]. [Cited 2020 May 8]. Available from: <https://www.stuff.co.nz/national/health/coronavirus/121343628/coronavirus-healthcare-workers-make-up-1-in-10-of-new-zealands-covid19-cases>
- 95 NIGER: COVID-19 Situation Report [Internet]. [Cited 2020 May 8]. Available from: [https://reliefweb.int/sites/reliefweb.int/files/resources/UNICEF\\_Niger\\_COVID-19\\_Situation\\_Report\\_No.4\\_-\\_27\\_April\\_-03\\_May\\_2020.pdf](https://reliefweb.int/sites/reliefweb.int/files/resources/UNICEF_Niger_COVID-19_Situation_Report_No.4_-_27_April_-03_May_2020.pdf)

- 96 Nigeria: 113 healthcare workers infected with COVID-19 [Internet]. [Cited 2020 May 8]. Available from: <https://www.aa.com.tr/en/africa/nigeria-113-healthcare-workers-infected-with-covid-19/1825398>
- 97 Bloomberg. Africa Virus News: Nigeria Aid Worker Dies of Covid-19, MSF Says [Internet]. [Cited 2020 May 8]. Available from: <https://www.bloomberg.com/news/articles/2020-04-20/aid-worker-dies-of-covid-19-in-nigeria-s-war-torn-northeast>
- 98 Virus cases among Pakistan's medical workers increase [Internet]. [Cited 2020 May 8]. Available from: <https://www.aa.com.tr/en/asia-pacific/virus-cases-among-pakistans-medical-workers-increase/1826007>
- 99 Coronavirus Disease 2019 (COVID-19) WHO Update 28 - Question of Palestine [Internet]. [cited 2020 May 8]. Available from: <https://www.un.org/unispal/document/coronavirus-disease-2019-covid-19-who-update-28/>
- 100 Panamá suma 146 muertes por el COVID-19 y supera los 5.000 casos de contagio [Internet]. [Cited 2020 May 8]. Available from: <https://www.msn.com/es-us/noticias/otras/panamá-suma-146-muertes-por-el-covid-19-y-supera-los-5000-casos-de-contagio/ar-BB137a9B>
- 101 Health workers with COVID-19 now at 1,934; recoveries rise to 449 [Internet]. [cited 2020 May 8]. Available from: <https://www.cnnphilippines.com/news/2020/5/8/health-workers-with-covid-19-1934-.html>
- 102 Physician's Weekly. Coronavirus cases in Poland exceed 10,000 weeks before election [Internet]. [Cited 2020 May 8]. Available from: <https://www.physiciansweekly.com/coronavirus-cases-in-poland/>
- 103 Coronavirus in Russia: The Latest News [Internet]. [Cited 2020 May 8]. Available from: <https://www.themoscowtimes.com/2020/05/08/coronavirus-in-russia-the-latest-news-aug-29-a69117>
- 104 Coronavirus a San Marino: scoperto focolaio nel reparto di Medicina, ma si registrano 5 nuovi guariti [Internet]. [Cited 2020 May 8]. Available from: <https://www.sanmarinortv.sm/news/attualita-c4/coronavirus-a-san-marino-scoperto-focolaio-nel-reparto-di-medicina-ma-si-registrano-5-nuovi-guariti-a186478>
- 105 Serbia reports a total of 5,994 coronavirus cases [Internet]. [Cited 2020 May 8]. Available from: <https://www.srbija.gov.rs/vest/en/154514/serbia-reports-a-total-of-5994-coronavirus-cases.php>
- 106 The Straits Times. 66 healthcare workers infected but none likely in the course of work, Politics News & Top Stories [Internet]. [cited 2020 May 8]. Available from: <https://www.straitstimes.com/politics/66-healthcare-workers-infected-but-none-likely-in-the-course-of-work>
- 107 Somali health workers contract COVID-19 [Internet]. [Cited 2020 May 8]. Available from: <https://www.aa.com.tr/en/africa/somali-health-workers-contract-covid-19/1807013>
- 108 Somaliland Standard. Somalia: Nurse succumbs to Covid-19 [Internet]. [Cited 2020 May 8]. Available from: <http://somalilandstandard.com/somalia-nurse-succumbs-to-covid-19/>
- 109 Over 500 S. African health workers contract COVID-19 [Internet]. [Cited 2020 May 8]. Available from: <https://www.aa.com.tr/en/africa/over-500-s-african-health-workers-contract-covid-19/1831768>
- 110 Kang SK. COVID-19 and MERS Infections in Healthcare Workers in Korea. Vol. 11, Safety and Health at Work. Elsevier Science B.V.; 2020. p. 125–6.
- 111 Ministry of Health & Welfare : News & Welfare Services > Press Release View Content [Internet]. [Cited 2020 May 8]. Available from: [https://www.mohw.go.kr/eng/nw/nw0101vw.jsp?PAR\\_MENU\\_ID=1007&MENU\\_ID=100701&page=1&CONT\\_SEQ=353968](https://www.mohw.go.kr/eng/nw/nw0101vw.jsp?PAR_MENU_ID=1007&MENU_ID=100701&page=1&CONT_SEQ=353968)



- 112 Spain coronavirus deaths climb by lowest daily amount in a month [Internet]. [Cited 2020 May 8]. Available from: <https://nypost.com/2020/04/19/spain-coronavirus-deaths-climb-by-lowest-daily-amount-in-a-month/>
- 113 Daily Mail Pakistan. 136 Tajik medical worker diagnosed with COVID-19 [Internet]. [cited 2020 May 8]. Available from: <http://dailymailnews.pk/2020/04/29/136-tajik-medical-worker-diagnosed-with-covid-19/>
- 114 WHO Thailand Situation Report. 2020.
- 115 ONMNE Tunisie. Prévention maladies nouvelles | Veille sanitaire - maladies à propagation rapide Tunisie [Internet]. [Cited 2020 May 8]. Available from: [http://www.onmne.tn/fr/publications.php?id\\_rub=5&id=123](http://www.onmne.tn/fr/publications.php?id_rub=5&id=123)
- 116 Duvar English. 7,428 health care workers infected with coronavirus, says Turkish health minister [Internet]. [cited 2020 May 8]. Available from: <https://www.duvarenglish.com/health-2/coronavirus/2020/04/29/7428-health-care-workers-infected-with-virus-says-minister/>
- 117 Коронавірус 2019-nCoV [Internet]. [Cited 2020 May 8]. Available from: <https://moz.gov.ua/koronavirus-2019-ncov>
- 118 The Guardian. Doctors, nurses, porters, volunteers: the UK health workers who have died from Covid-19 [Internet]. [cited 2020 May 8]. Available from: <https://www.theguardian.com/world/2020/apr/16/doctors-nurses-porters-volunteers-the-uk-health-workers-who-have-died-from-covid-19>
- 119 Number of key workers getting Covid-19 overtakes positive tests in hospitals [Internet]. [Cited 2020 May 8]. Available from: <https://www.theguardian.com/world/2020/may/05/number-of-key-workers-getting-covid-19-overtakes-positive-tests-in-hospitals>
- 120 MMWR. Characteristics of Health Care Personnel with COVID-19 — United States, February 12–April 9, 2020. 2019.
- 121 Sistema Nacional de Emergencias. Informe de situación en relación al coronavirus COVID-19 en Uruguay del 07/05/2020 [Internet]. [Cited 2020 May 8]. Available from: <https://www.gub.uy/sistema-nacional-emergencias/comunicacion/comunicados/informe-situacion-relacion-coronavirus-covid-19-uruguay-del-07052020>
- 122 CentralAsia. В Андижане 78 медработников заразились коронавирусом от пациентов [Internet]. [Cited 2020 May 8]. Available from: <https://centralasia.media/news:1610428/>
- 123 Bộ Y tế. Trang tin về dịch bệnh viêm đường hô hấp cấp COVID-19 [Internet]. [Cited 2020 May 8]. Available from: <https://ncov.moh.gov.vn/>
