# Supplementary figures and images for: Infection and mortality of healthcare workers worldwide from COVID-19: a systematic review
Source: PubMed Central journal article supplement — BMJ Glob Health. 2020 Dec 4;5(12):e003097. doi: 10.1136/bmjgh-2020-003097 (PMC7722361; doi:10.1136/bmjgh-2020-003097), 2020-12-04

**Appendix S9: Supplementary figures for the COVID-19 infections and deaths over time**

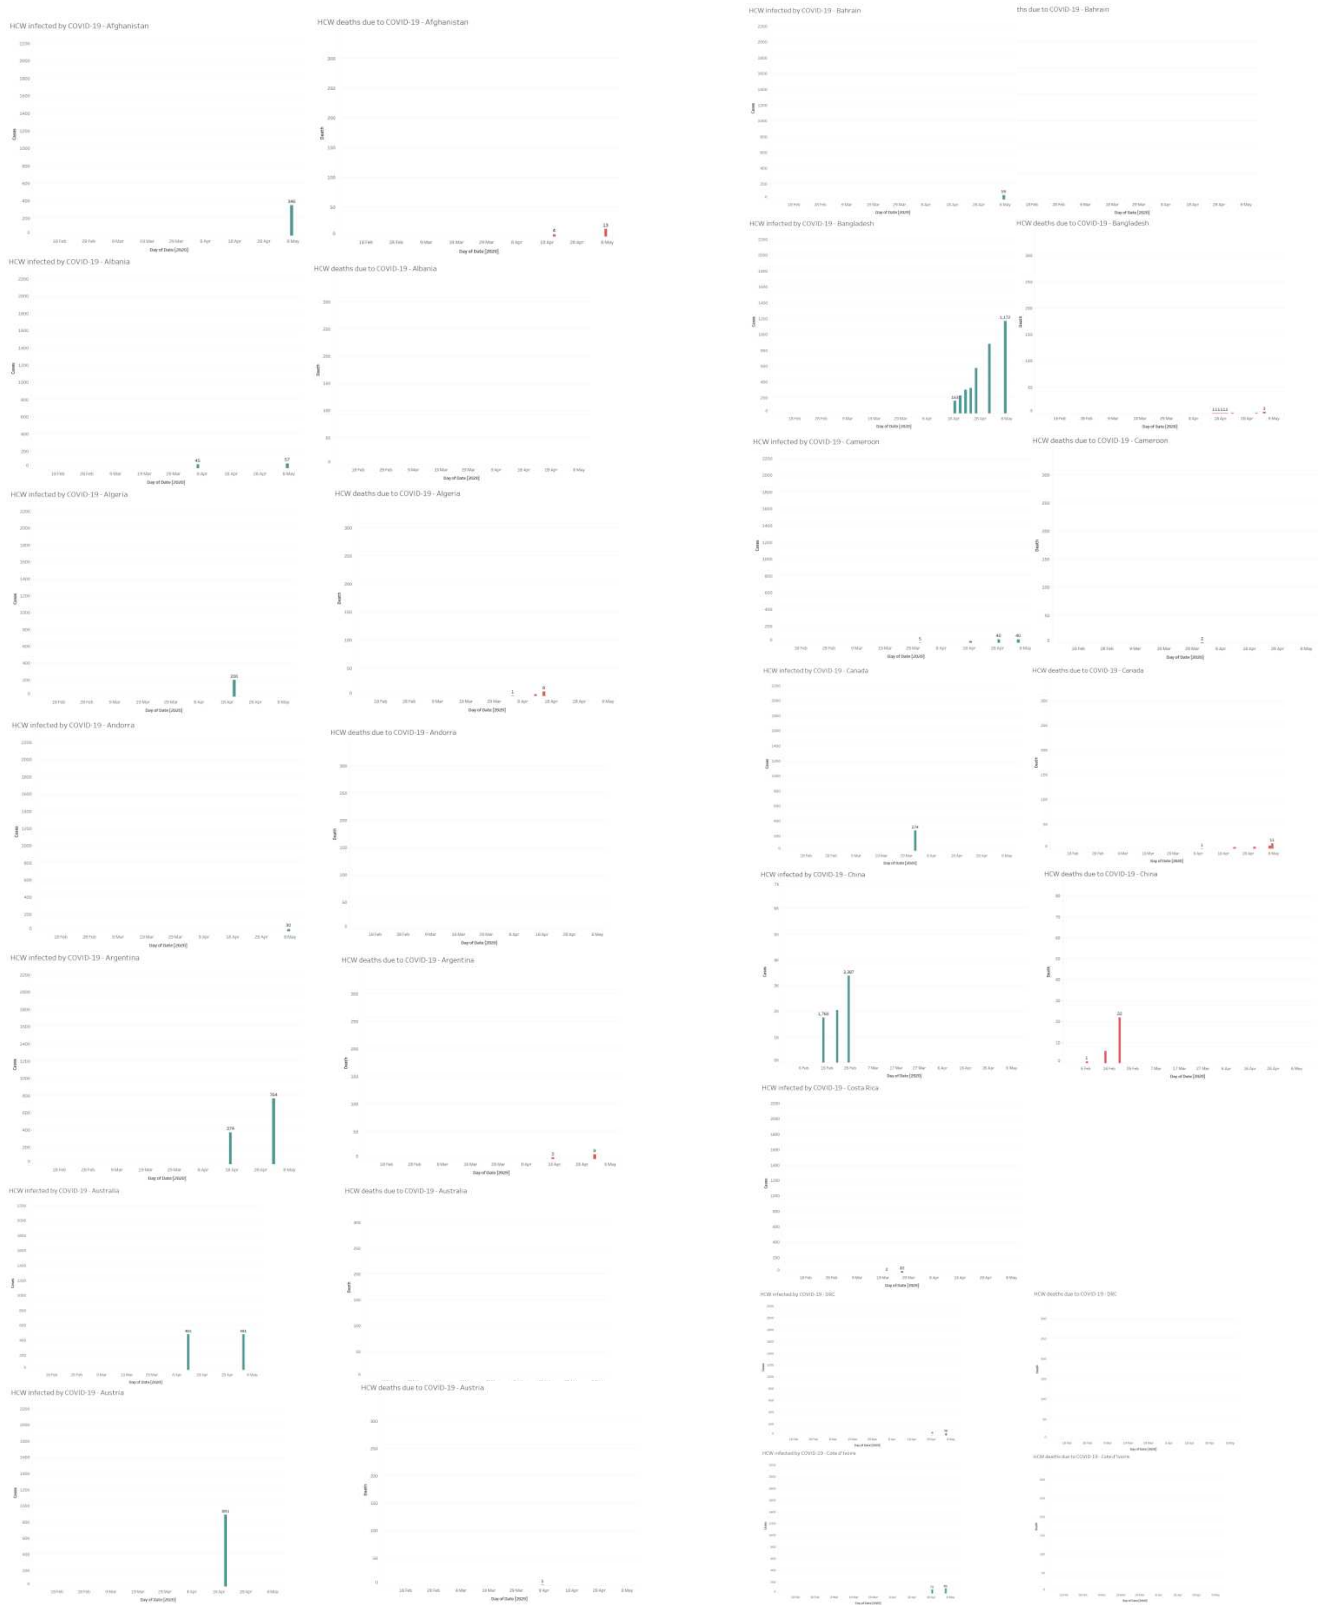



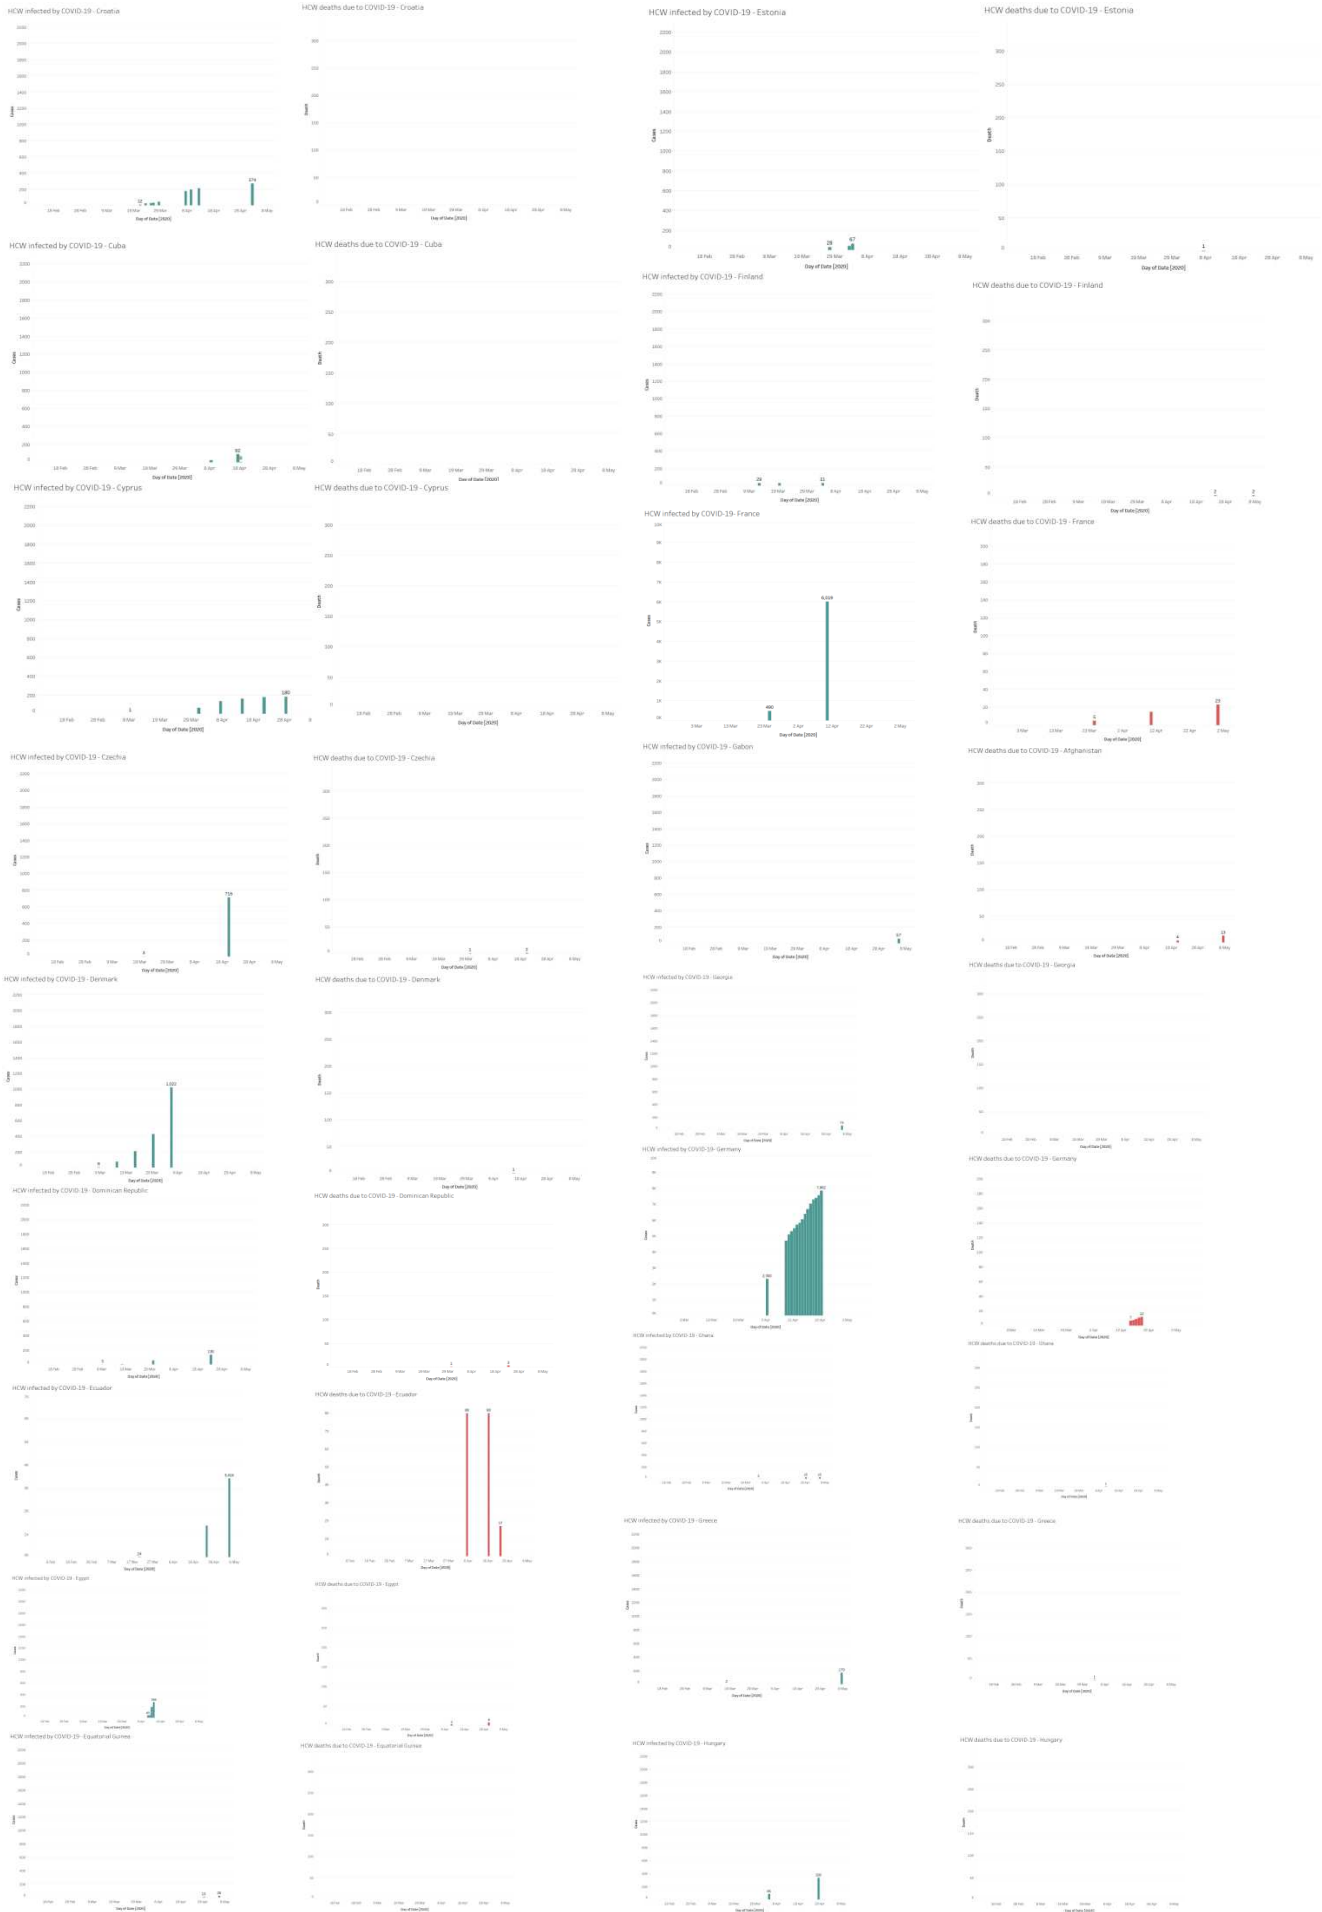

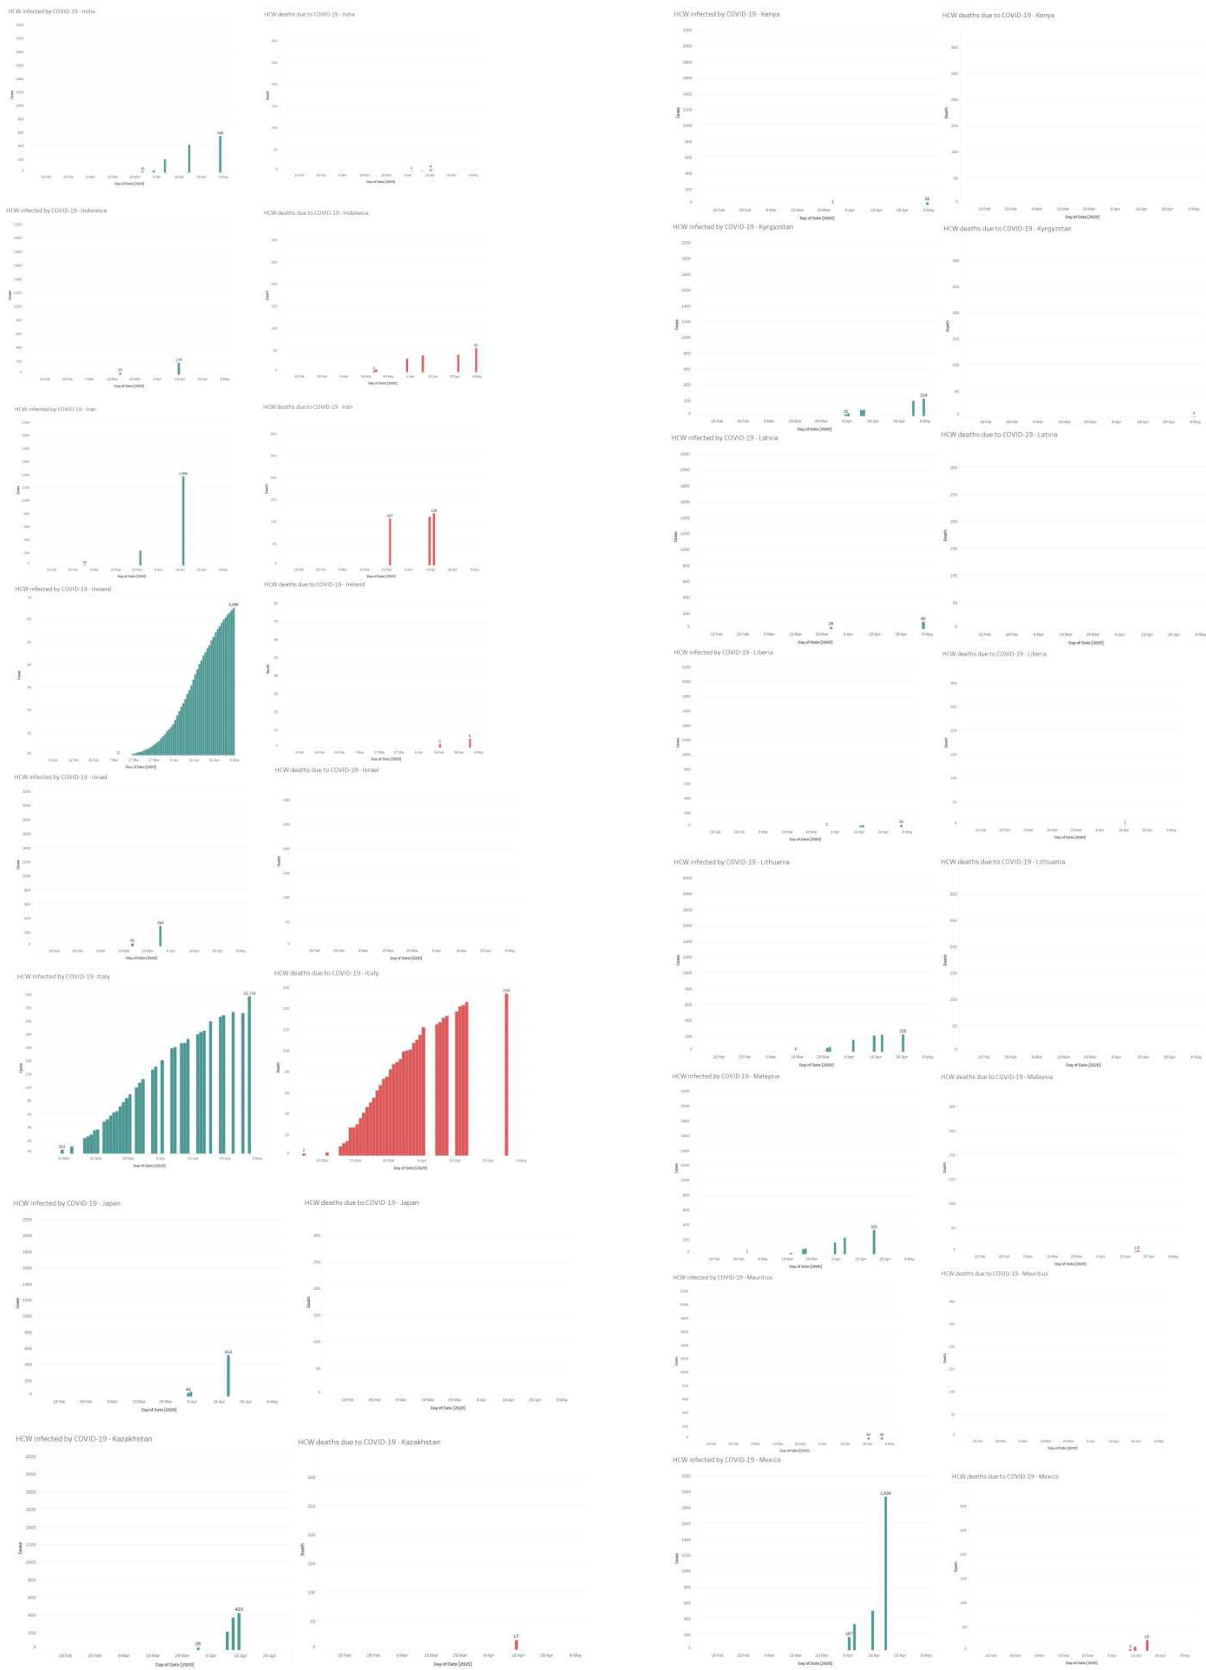

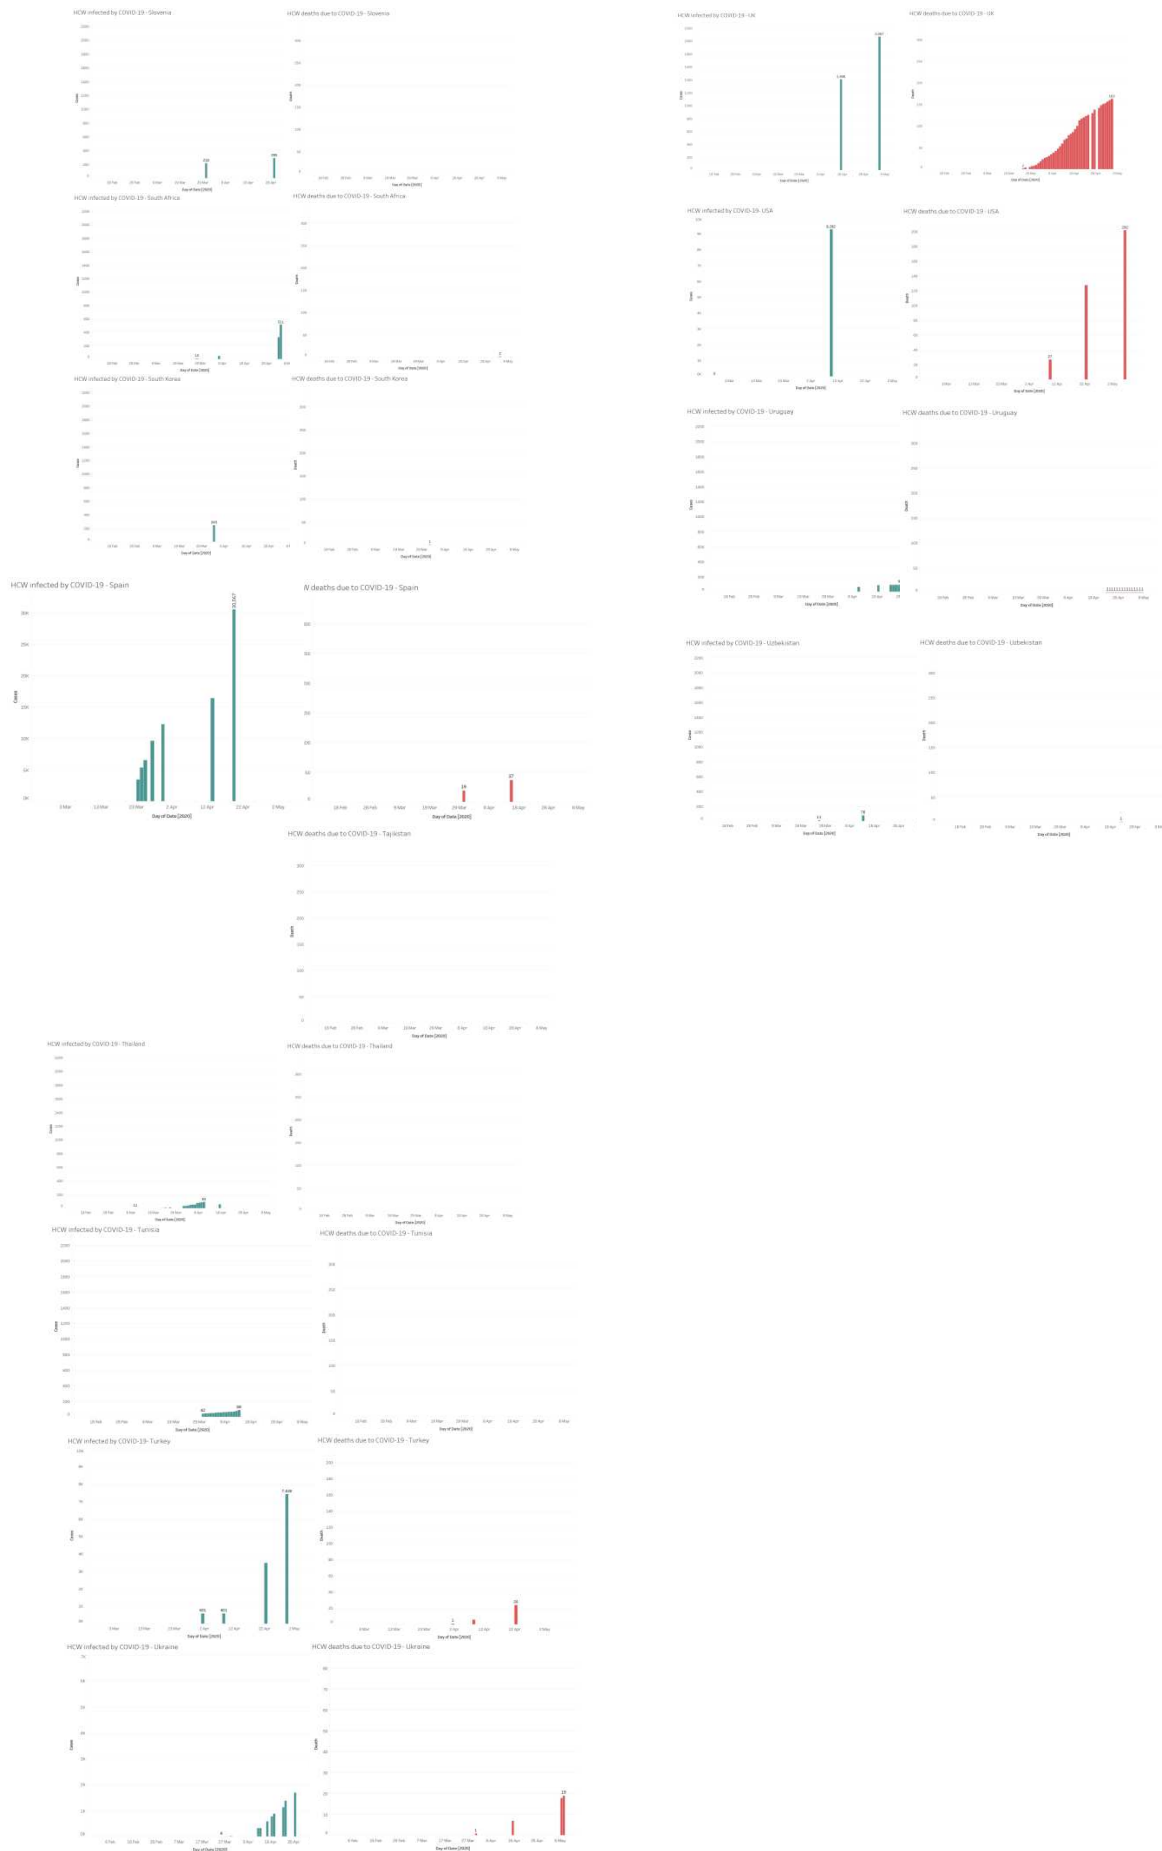

Supplement: bmjgh-2020-003097supp010.pdf [file bmjgh-2020-003097supp010.pdf]
